# Supplementary material for: Metal-free photoinduced hydrogen atom transfer assisted C(sp 3 )–H thioarylation
Source: Royal Society of Chemistry journal article supplement (doi:10.1039/d3gc00359k), 2023-01-01

## Supporting Information

### **Metal-free photoinduced hydrogen atom transfer assisted C(*sp*<sup>3</sup>)–H thioarylation**

Jagrit Grover,<sup>a#</sup> Gaurav Prakash,<sup>a#</sup> Chitralla Teja,<sup>a</sup> Goutam Kumar Lahiri,<sup>\*a</sup> Debabrata Maiti<sup>\*a</sup>

<sup>a</sup>IIT Bombay, Department of Chemistry, Powai, Mumbai 400076, India.

E-mail: lahiri@chem.iitb.ac.in (GKL); dmaiti@iitb.ac.in (DM).

<sup>#</sup> These authors contributed equally.

***Table of contents:***

| <b>S. No.</b> | <b>Content</b>                   | <b>Page No.</b> |
|---------------|----------------------------------|-----------------|
| <b>1.</b>     | General information              | <b>S3</b>       |
| <b>2.</b>     | Synthesis of starting materials. | <b>S3-S4</b>    |
| <b>3.</b>     | Reaction Optimization            | <b>S4-S6</b>    |
| <b>4.</b>     | General procedure                | <b>S7</b>       |
| <b>5.</b>     | Continuous flow reaction set-up  | <b>S7</b>       |
| <b>6.</b>     | Post Synthetic modifications     | <b>S8-S9</b>    |
| <b>7.</b>     | Mechanistic investigations       | <b>S9-S15</b>   |
| <b>8.</b>     | Characterization data            | <b>S16-S43</b>  |
| <b>9.</b>     | References                       | <b>S43</b>      |
| <b>10.</b>    | NMR Spectra                      | <b>S44-S103</b> |

## **1. General Information:**

All required fine chemicals were purchased from Sigma-Aldrich, Alfa-aesar, Spectrochem-India, TCI India, BLD Pharma, and used directly without purification unless stated otherwise. All organic reaction solvents were bought from commercial sources and purified according to the general purification technique. All air and moisture sensitive reactions were carried out under nitrogen atmosphere using standard Glove box technique.  $^1\text{H}$  and  $^{13}\text{C}$  Nuclear Magnetic Resonance (NMR) spectra were acquired at various field strengths as indicated and were referenced to  $\text{CHCl}_3$  (7.26 and 77.20 ppm for  $^1\text{H}$  and  $^{13}\text{C}$  respectively).  $^1\text{H}$  NMR coupling constants are reported in Hertz and refer to apparent multiplicities and not true coupling constants. Data for  $^1\text{H}$  are reported as follows: chemical shift ( $\delta$  ppm), multiplicity (s = singlet, d = doublet, t = triplet, q = quartet, p = pentet, h = hextet, hept = heptet, m = multiplet, br = broad), coupling constant (Hz), and integration. High resolution mass spectrometry (HRMS-ESI) experiments were performed on Agilent 6530 Accurate-Mass Q-TOF LC/MS in ESI mode. FT-IR were recorded on an Agilent Cary 630 instrument and are reported in wavenumbers ( $\text{cm}^{-1}$ ). Analytical TLC: aluminum backed plates pre-coated (0.25 mm) with Merck Silica Gel 60 F254. Compounds were visualized by exposure to UV-light or by dipping the plates in permanganate ( $\text{KMnO}_4$ ) stain followed by heating or by dipping the plates in iodine chamber. Flash column chromatography was performed using Merck Silica Gel (100-200 mesh). All mixed solvent eluents are reported as v/v solutions. All the reactions were conducted in Borosilicate 16 mL glass tubes with threaded end; Kimble Black phenolic screw thread closures with open tops; Thermo Scientific National PTFE/Silicone septa for sample screw thread caps. Custom-made photo setup (with fan): Kessil PR160L Blue LEDs (390 nm) bulb arranged around the reaction tubes (~ 3 cm distance between the light source and the tube). Yield for optimization studies were determined from NMR of the crude reaction mixtures using 1,3,5-trimethoxybenzene (TMB) as internal standard.

## **2. Synthesis of starting materials**

### ***Preparation of thioarylate coupling partners:***

These were prepared according to the procedures known in the literature. All these starting materials are already known in the literatures.

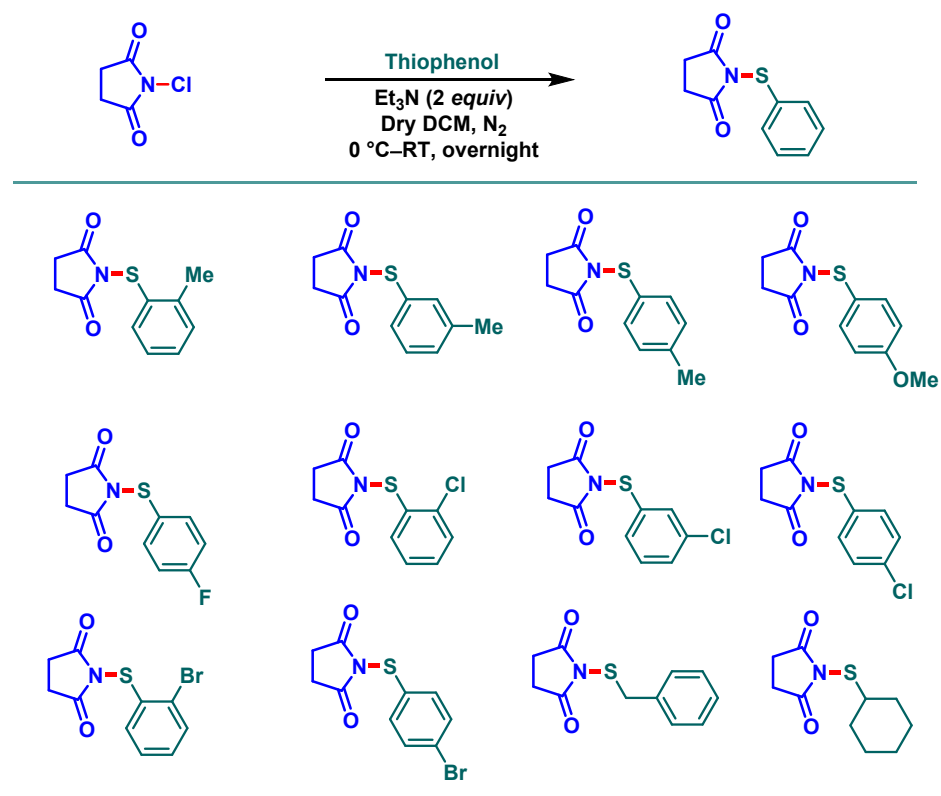

### 3. Optimization of reaction conditions

Yield denoted are GC yields using *n*-decane as internal standard.

**Table S1. Photocatalysts Optimization**

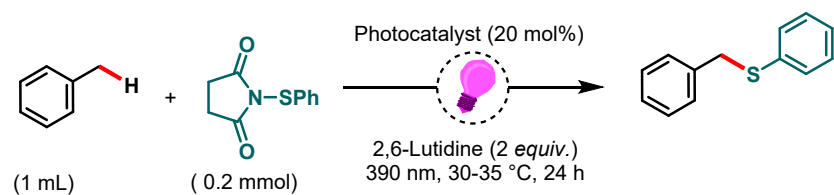



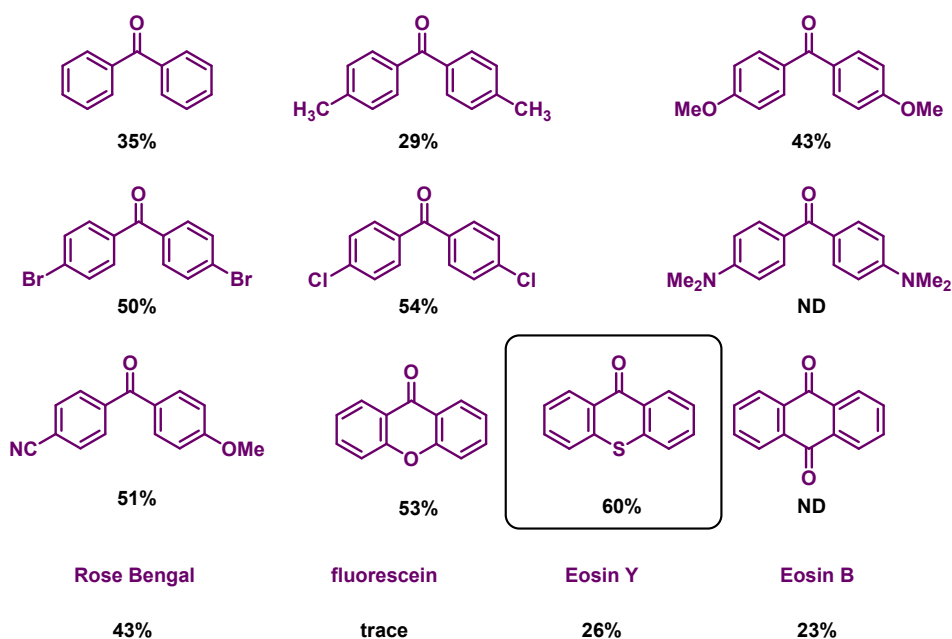

**Table S2. Base Optimization**

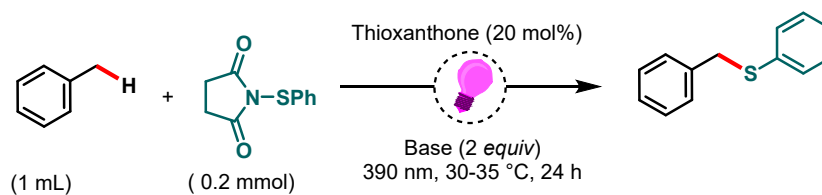

| S. No. | Base                               | Yield      |
|--------|------------------------------------|------------|
| 1.     | Na <sub>2</sub> CO <sub>3</sub>    | 33%        |
| 2.     | K <sub>2</sub> CO <sub>3</sub>     | 41%        |
| 3.     | K <sub>2</sub> HPO <sub>4</sub>    | 58%        |
| 4.     | <b>K<sub>3</sub>PO<sub>4</sub></b> | <b>63%</b> |
| 5.     | DIPEA                              | 51%        |
| 6.     | 2,6-lutidine                       | 60%        |
| 7.     | Tetramethylguanidine (TMG)         | ND         |
| 8.     | DBU                                | 37%        |

**Table S3. Base amount optimization**

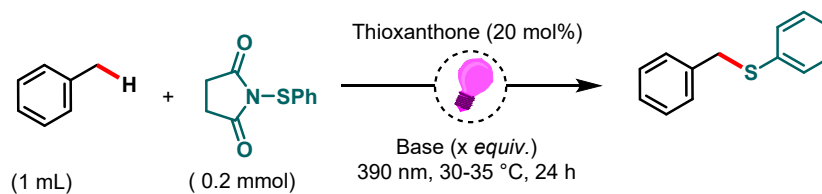

| S. No. | K <sub>3</sub> PO <sub>4</sub> (equiv) | Yield (%) |
|--------|----------------------------------------|-----------|
| 1.     | 1                                      | 41        |
| 2.     | <b>2</b>                               | <b>63</b> |
| 3.     | 3                                      | 58        |
| 4.     | 4                                      | 47        |

**Table S4. Photocatalyst amount optimization**

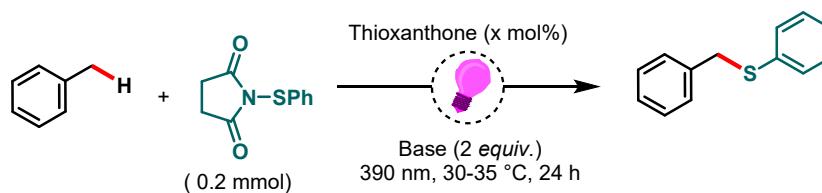

| S. No. | Thioxanthone (mol%) | Yield (%) |
|--------|---------------------|-----------|
| 1.     | 10                  | 42        |
| 2.     | 20                  | 63        |
| 3.     | <b>30</b>           | <b>68</b> |
| 4.     | 40                  | 65        |

**Table S5. Light source optimization**

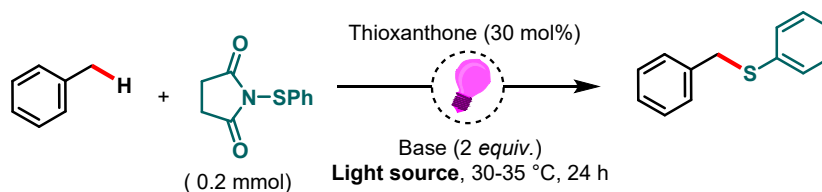

| S. No. | Light         | Yield (%) |
|--------|---------------|-----------|
| 1.     | 370 nm        | 62        |
| 2.     | <b>390 nm</b> | <b>68</b> |
| 3.     | 440 nm        | 7         |
| 4.     | 456 nm        | 9         |
| 5.     | White CFL     | 44        |

**Table S6: Control experiment**

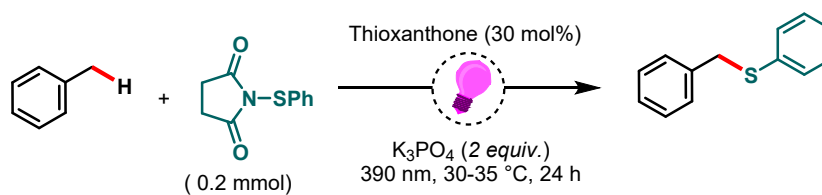

| S. No. | Deviation      | Yield (%) |
|--------|----------------|-----------|
| 1.     | <b>None</b>    | <b>68</b> |
| 2.     | No PC          | ND        |
| 3.     | No Base        | 21        |
| 4.     | No light at RT | trace     |

#### 4. General Procedure for the thioarylation reaction of methylarenes and alkanes under optimized conditions:

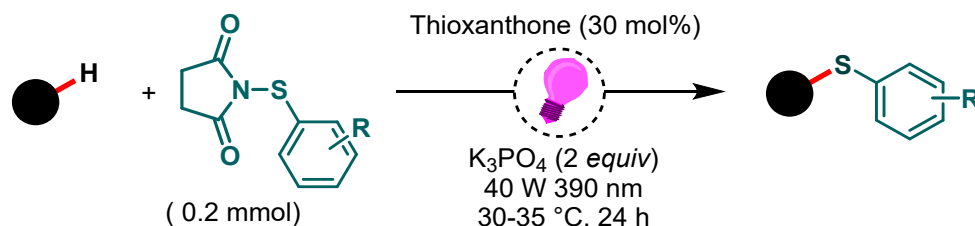

To an oven-dried screw cap reaction tube equipped with a magnetic stir bar was added thioxanthone (12.7 mg, 0.06 equiv.), K<sub>3</sub>PO<sub>4</sub> (84.8 mg, 2.0 equiv.), 1-(phenylthio)pyrrolidine-2,5-dione derivative (0.2 mmol, 1.0 equiv.) inside the Glove box. The tube was sealed with a rubber fitted screw cap followed by sealing with parafilm, taken out from the Glove box. To this reaction vial was added 1 mL of respective methylarene/alkane under positive flow of nitrogen. The reaction vial was irradiated with 40 W, 390 nm Kessil PR-160L Blue LED from 3 cm away for 24 hours under the continuous flow of fan to maintain the temperature at 30-35 °C. The reaction was quenched by exposure to air, followed by water and subsequent extraction with EtOAc (3 x 5 mL). The combined organic layers were dried over Na<sub>2</sub>SO<sub>4</sub>, filtered, and concentrated in vacuum. The crude residue was purified by flash chromatography on silica gel (100-200 mesh size) to afford the desired thioarylated product.

#### 5. Scale-up reaction set-up using continuous flow-photo reactor

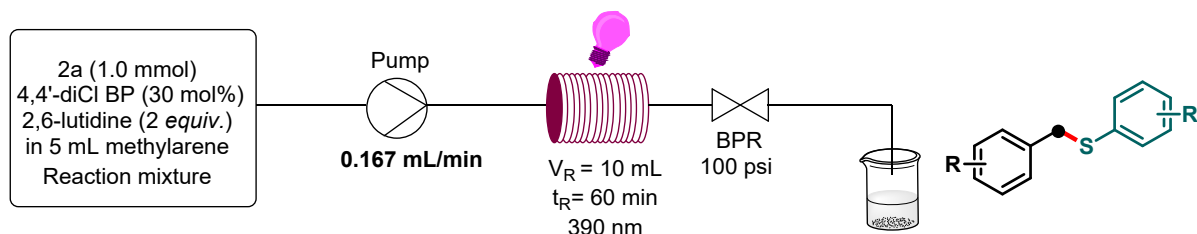

1-(phenylthio)pyrrolidine-2,5-dione (2.0 mmol) (2a), 4,4'-diChlorobenzophenone (0.3 equiv.), 2,6-lutidine (2 equiv.) were dissolved in 5 mL toluene. It was filled into a 10 mL syringe and then loaded onto a syringe pump. The reaction mixture was passed to a micro flow reactor which was illuminated with two 40 W, 390 nm Kessil PR-160L Blue LEDs. A fan was kept to prevent the reactor from heating. 60 min of the residence time was achieved by keeping the flow rate of 0.167 mL per min. The reaction was quenched by exposure to air, followed by water and subsequent extraction with EtOAc (3 x 5 mL). The combined organic layers were dried over Na<sub>2</sub>SO<sub>4</sub>, filtered, and concentrated in vacuum. The crude residue was purified by flash chromatography on silica gel (100-200 mesh size) to afford the desired thioarylated product.

## 6. Post synthetic modifications

Post synthetic modifications were performed *via* literature known procedures.<sup>1-4</sup>

a. Suzuki coupling<sup>1</sup>: An oven-dried screw cap reaction tube was charged with a magnetic stir-bar. [Pd(OAc)<sub>2</sub>] (2.5 mol%), S-Phos (5 mol%), bromo-thioarylated product (0.2 mmol), and 4-methoxy phenyl boronic acid (1.2 *equiv.*) and K<sub>3</sub>PO<sub>4</sub> (3 *equiv.*) were added. Degassed THF (2 ml) was injected in it and the reaction was stirred at room temperature under nitrogen atmosphere. The reaction was stirred continuously for 24 h at 70 °C. Once the reaction was over the mixture was diluted with 5 ml EtOAc and filtered through the celite. The filtrate was evaporated under low pressure and the compound was isolated through silica column (100-200 mesh).

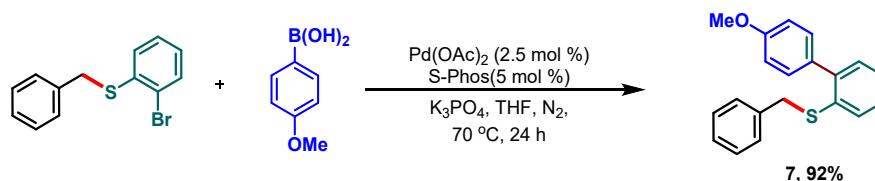

b. Sonogashira coupling<sup>2</sup>: An oven-dried screw cap reaction tube was charged with a magnetic stir-bar. [Pd(PPh<sub>3</sub>)<sub>2</sub>Cl<sub>2</sub>] (2.5 mol%), CuI (5 mol%) and bromo-thioarylated product (0.2 mmol). Degassed Triethylamine (1 ml) was injected in it and the reaction was stirred at room temperature under nitrogen atmosphere. Under nitrogen atmosphere phenylacetylene (1.25 *equiv.*) was added to the reaction mixture slowly. Gradually the reaction turned dark. The reaction was stirred continuously for 24 h at 55 °C. Once the reaction was over the mixture was diluted with 5 ml EtOAc and filtered through the celite. The filtrate was evaporated under low pressure and the compound was isolated through silica column (100-200 mesh).

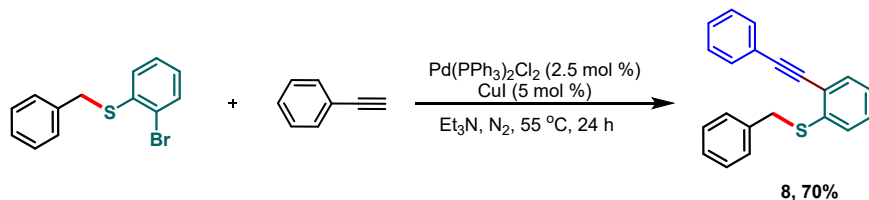

c. Sulfide to sulfoxide<sup>3</sup>: An oven-dried screw cap reaction tube was charged with a magnetic stir-bar. thioarylated product (0.2 mmol) and *meta*-chloroperoxybenzoic acid (1 *equiv.*) were added. DCM (1 ml) was injected in it and the reaction was stirred at room temperature for 2 hours. Once the reaction was over the mixture was diluted with 5 ml DCM and filtered through the celite. The filtrate was evaporated under low pressure and the compound was isolated through silica column (100-200 mesh).

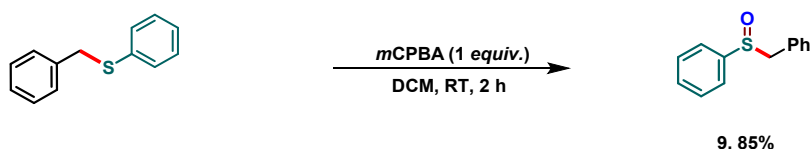

d. Sulfide to unsymmetrical-disulfide<sup>4</sup>: An oven-dried screw cap reaction tube was charged with a magnetic stir-bar. Thioarylated product (0.2 mmol) and  $\text{FeCl}_3 \cdot 6\text{H}_2\text{O}$  (1.5 equiv.) were added. 40% aqueous acetonitrile (5 ml) was added to it and the reaction was irradiated with a high-pressure mercury lamp through a Pyrex filter for about 180 h in air. The reaction mixture was evaporated under low pressure and isolated through silica column (100-200 mesh).

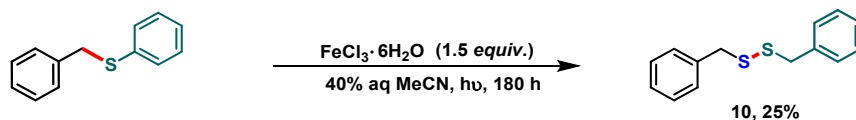

**Failed or low yielding heteroarenes:**

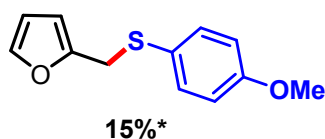

\* determined by GC-MS

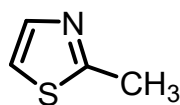

2-methylthiazole

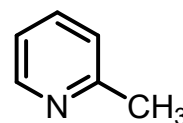

2-methylpyridine

## 7. Mechanistic investigations

### a. Radical trapping experiment with TEMPO and BHT

When the radical scavenger TEMPO (2,2,6,6-tetramethylpiperidin-1-yl)oxyl (3.0 equiv.) or BHT (Butylatedhydroxytoluene) (3.0 equiv.) was added to the standard reaction conditions, no conversion to the desired thioarylated product was observed, suggesting that the reaction proceeds via a radical pathway (Scheme S4a). The TEMPO and BHT adduct formation was detected through HRMS study. All these observations indicate the generation of benzyl and thioaryl radical.

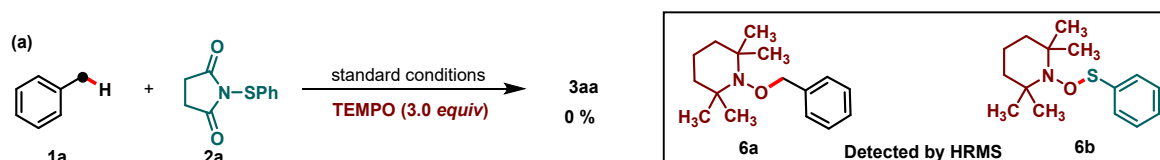

HRMS spectra of the benzylic radical adduct with TEMPO

| Formula     | m/z      | Observed M/Z     | Difference Da     | Difference PPM   | Score |
|-------------|----------|------------------|-------------------|------------------|-------|
| C16 H25 N O | 248.2018 | 248.201845912194 | 0.579846228617953 | 2.34571685826747 | 87.44 |

[illegible]

**Cpd. 1: C<sub>15</sub> H<sub>23</sub> N O S**

| Formula       | m/z      | Observed M/Z     | Difference Da     | Difference PPM    | Score |
|---------------|----------|------------------|-------------------|-------------------|-------|
| C15 H23 N O S | 266.1566 | 266.156562817579 | -0.69627293277108 | -2.62595829008967 | 96.53 |

[illegible]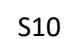

## HRMS spectra of the benzylic radical adduct with BHT

### Compound Details

Cpd. 1: C<sub>22</sub>H<sub>30</sub>O

| Formula                           | m/z      | Observed M/Z     | Difference Da      | Difference PPM    | Score |
|-----------------------------------|----------|------------------|--------------------|-------------------|-------|
| C <sub>22</sub> H <sub>30</sub> O | 311.2363 | 311.236334523362 | -0.860899887243249 | -2.77504050309202 | 83.92 |

### Compound Spectra (Zoomed)

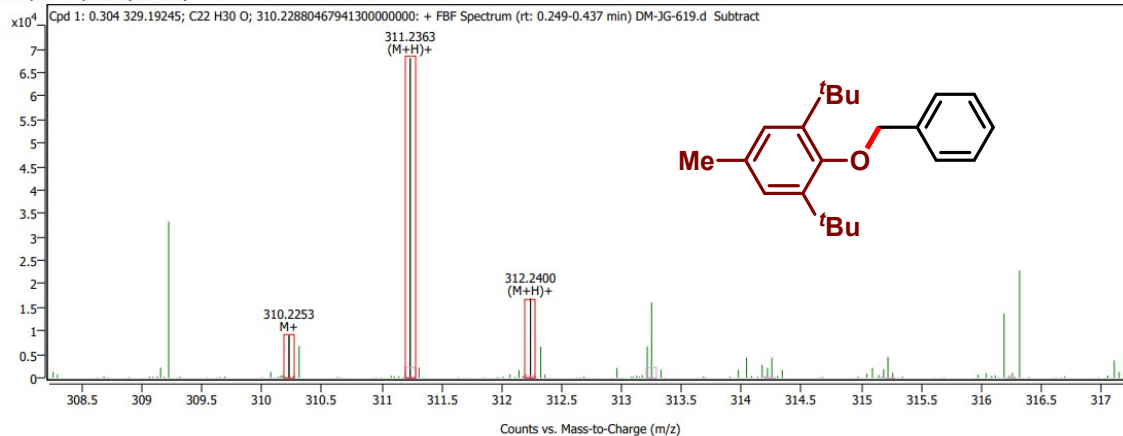

## HRMS spectra of the thioaryl radical adduct with BHT

### Compound Details

Cpd. 1: C<sub>21</sub>H<sub>28</sub>O S

| Formula                             | m/z      | Observed M/Z     | Difference Da      | Difference PPM    | Score |
|-------------------------------------|----------|------------------|--------------------|-------------------|-------|
| C <sub>21</sub> H <sub>28</sub> O S | 329.1924 | 329.192437835529 | -0.841686102887707 | -2.56466114245344 | 73.05 |

### Compound Spectra (Zoomed)

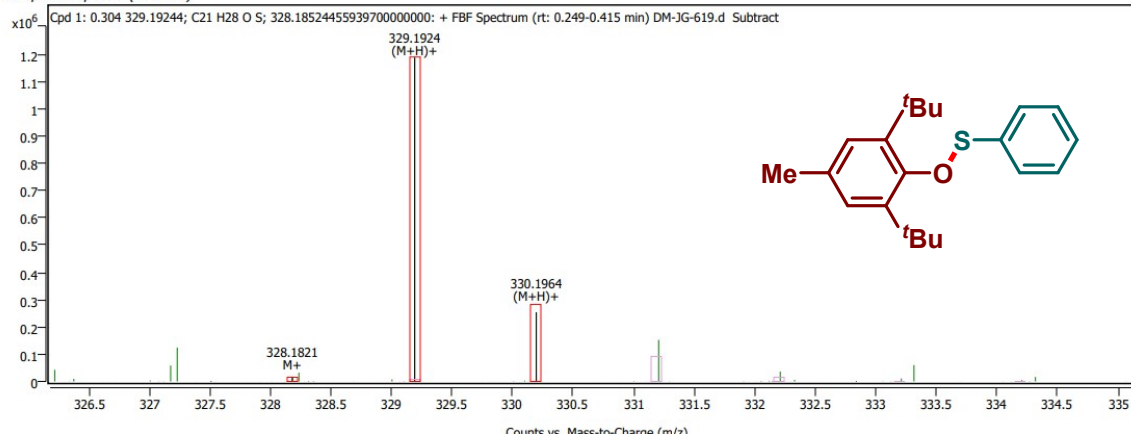

### c. Radical trapping experiment with 4-tert butyl styrene

When *tert*-butyl styrene was added to the standard reaction conditions, no desired thioarylated product was observed rather the thioaryl group added to olefin was detected by HRMS.

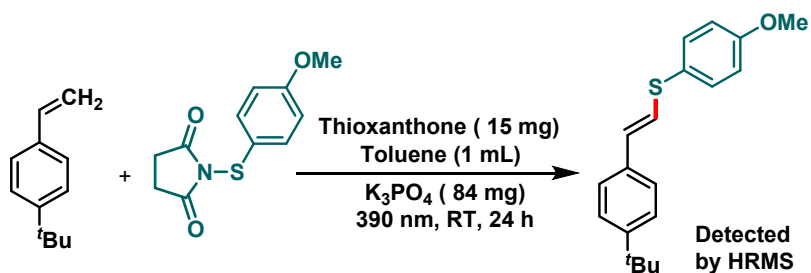

#### Compound Details

Cpd. 1: C<sub>19</sub>H<sub>22</sub>O S

| Formula                             | m/z      | Observed M/Z     | Difference Da      | Difference PPM    | Score |
|-------------------------------------|----------|------------------|--------------------|-------------------|-------|
| C <sub>19</sub> H <sub>22</sub> O S | 299.1460 | 299.146035806869 | -0.738004100696799 | -2.47536807969713 | 80.65 |

#### Compound Spectra (Zoomed)

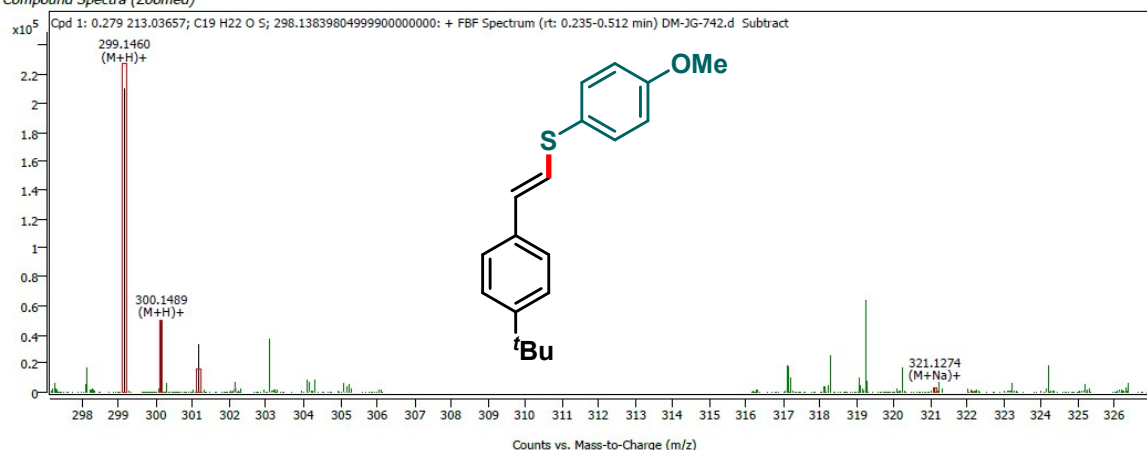

#### d. Radical probing experiment without coupling partner

When no thioaryl coupling partner was added to the standard reaction conditions, 1,2-diphenylethane was observed by GC-MS.

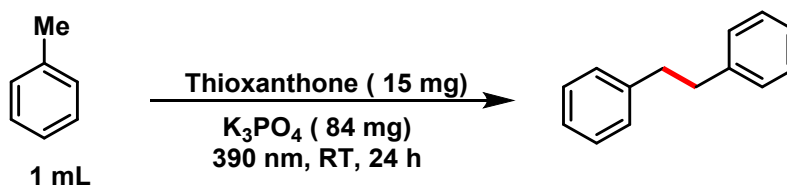

#### e. Intramolecular competitive experiment using 4-ethyl toluene as substrate

When 4-ethyl toluene was used as the substrate, we observed that product distribution was 29:71. 29% on the methyl (1°) and 71% on the methylene carbon (2°).



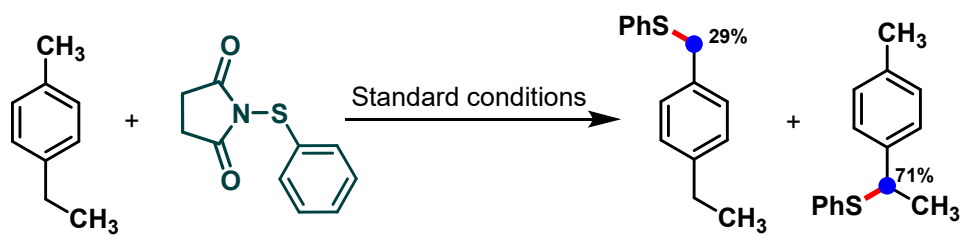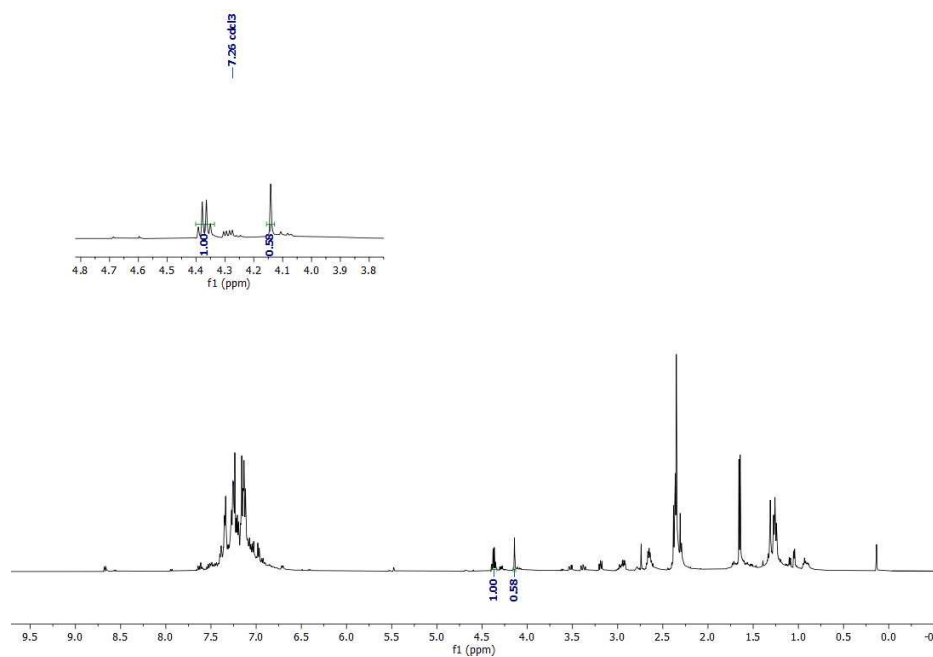

***f. Intramolecular competitive experiment using 4-ethyl toluene as substrate***

When toluene and cyclohexane equimolar mixture was used as the substrate, we observed that thioarylated product formed only with toluene.

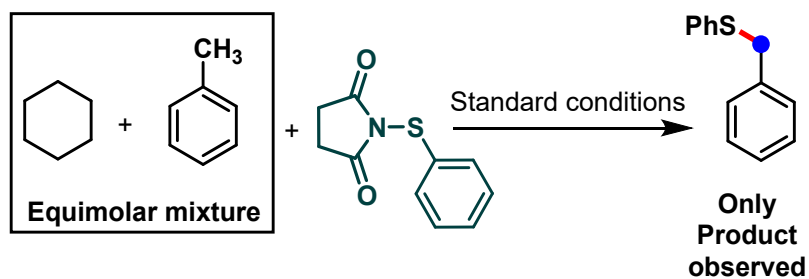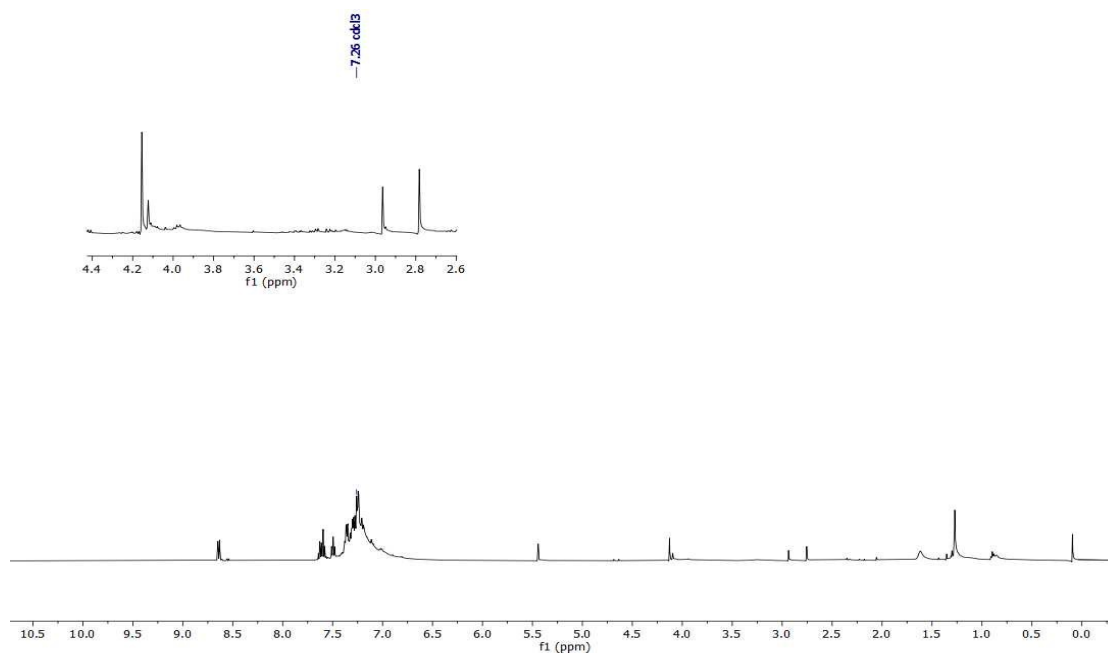

***g. Stern-volmer fluorescence quenching experiments:***

Fluorescence quenching experiments were performed on a Horiba Duetta spectrometer and 1 mm High Precision Cell made of quartz from Hellma Analytics. In a typical experiment, a 10

mM solution of photocatalyst in benzene; thioxanthone in dry and distilled benzene was treated with the appropriate amount of quencher in a screw-top 1.0 cm quartz cuvette. All the reagents were dispensed in stock solutions prepared volumetrically inside a nitrogen filled glove box. All solutions were excited at  $\lambda = 390$  nm and the luminescence was measured over a range of 450 – 700 nm ( $\lambda_{\text{max}} = 474$  nm). It was clearly found that the both toluene (substrate) and thioaryl coupling partner (1-(phenylthio)pyrrolidine-2,5-dione) were able to quench the emission of thioxanthone (Fig. S2 and S3). Notably, dilution using benzene could not quench the emission of the photocatalyst.

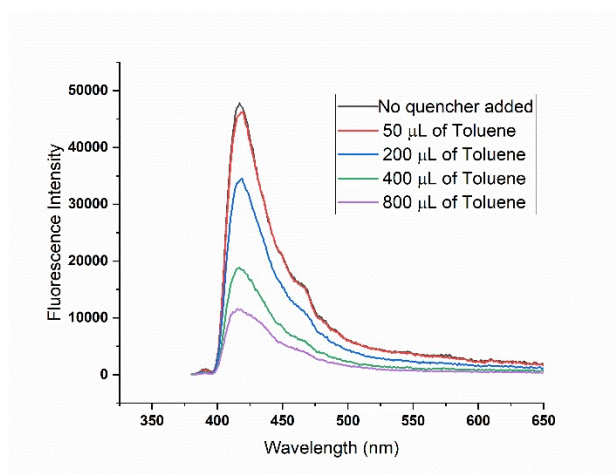

**Figure S1.** Emission Quenching of thioxanthone using toluene

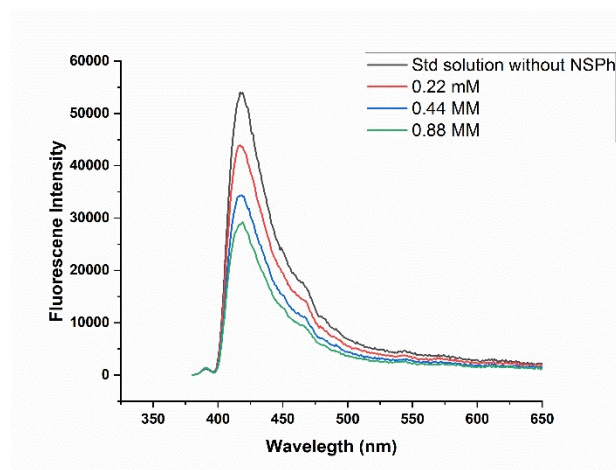

**Figure S2.** Emission Quenching of thioxanthone using NSPh

## 8. Characterization data

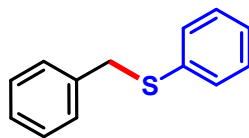

**Benzyl(phenyl)sulfane (3aa).**

The title compound 3aa was prepared following the general procedure 4.

**Eluent:** petroleum ether (100%).

**Physical State:** Colourless liquid

**Isolated Yield:** 68%

**<sup>1</sup>H NMR** (400 MHz, CDCl<sub>3</sub>) δ 7.32 (d, *J* = 1.6 Hz, 1H), 7.31 – 7.27 (m, 5H), 7.27 – 7.22 (m, 3H), 7.21 – 7.15 (m, 1H), 4.12 (s, 2H).

**<sup>13</sup>C NMR** (101 MHz, CDCl<sub>3</sub>) δ 137.64, 136.54, 130.03, 129.49, 129.00, 128.67, 127.35, 126.53, 39.25.

**GCMS (m/z):** calcd. 200.0660 for C<sub>13</sub>H<sub>12</sub>S found 200.0.

**IR (thin film, cm<sup>-1</sup>):** 735, 908, 1089, 1220, 740, 920, 1089, 1227, 2832.

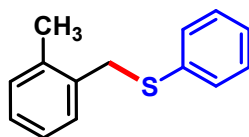

**(2-methylbenzyl)(phenyl)sulfane (3ab)**

The title compound 3ab was prepared following the general procedure 4.

**Eluent:** petroleum ether (100%).

**Physical State:** Colourless liquid

**Isolated Yield:** 65%

**<sup>1</sup>H NMR** (500 MHz, CDCl<sub>3</sub>) δ 7.35 – 7.31 (m, 2H), 7.26 (d, *J* = 4.5 Hz, 2H), 7.23 – 7.19 (m, 1H), 7.18 – 7.13 (m, 3H), 7.12 – 7.07 (m, 1H), 4.11 (s, 2H), 2.39 (s, 3H).

**<sup>13</sup>C NMR** (101 MHz, CDCl<sub>3</sub>) δ 136.93, 136.80, 135.23, 130.65, 130.42, 129.96, 129.02, 127.70, 126.64, 126.19, 37.60, 19.37.

**GCMS (m/z):** calcd. 214.0816 for C<sub>14</sub>H<sub>14</sub>S found 214.0.

**IR (thin film, cm<sup>-1</sup>):** 740, 920, 1089, 1227, 1574, 1750, 2927, 3062.

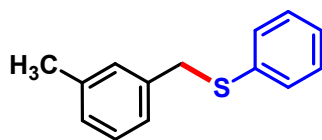

**(3-methylbenzyl)(phenyl)sulfane (3ac)**

The title compound 3ac was prepared following the general procedure 4.

**Eluent:** petroleum ether (100%).

**Physical State:** Colourless liquid

**Isolated Yield:** 68%

**<sup>1</sup>H NMR** (500 MHz, CDCl<sub>3</sub>) δ 7.33 – 7.29 (m, 2H), 7.27 (s, 1H), 7.23 (d, *J* = 9.9 Hz, 1H), 7.20 – 7.15 (m, 2H), 7.13 – 7.07 (m, 2H), 7.05 (d, *J* = 7.5 Hz, 1H), 4.09 (s, 2H), 2.32 (s, 3H).

**<sup>13</sup>C NMR** (101 MHz, CDCl<sub>3</sub>) δ 138.35, 137.43, 136.79, 129.86, 129.76, 129.00, 128.56, 128.15, 126.43, 126.04, 39.18, 21.53.

**GCMS (m/z):** calcd. 214.0816 for C<sub>14</sub>H<sub>14</sub>S found 214.0.

**IR (thin film, cm<sup>-1</sup>):** 737, 945, 1075, 1240, 1765, 2920.

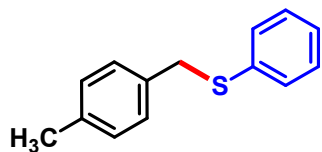

**(4-methylbenzyl)(phenyl)sulfane (3ad)**

The title compound 3ad was prepared following the general procedure 4.

**Eluent:** petroleum ether (100%).

**Physical State:** Colourless liquid

**Isolated Yield:** 70%

**<sup>1</sup>H NMR** (500 MHz, CDCl<sub>3</sub>) δ 7.33 – 7.29 (m, 2H), 7.27 (s, 1H), 7.24 (d, *J* = 8.0 Hz, 1H), 7.21 – 7.14 (m, 3H), 7.09 (d, *J* = 7.8 Hz, 2H), 4.09 (s, 2H), 2.32 (s, 3H).

**<sup>13</sup>C NMR** (126 MHz, CDCl<sub>3</sub>) δ 137.03, 136.81, 134.49, 129.81, 129.37, 128.99, 128.88, 126.38, 38.87, 21.29.

**GCMS (m/z):** calcd. 214.0816 for C<sub>14</sub>H<sub>14</sub>S found 214.0.

**IR (thin film, cm<sup>-1</sup>):** 757, 965, 1085, 1247, 1774, 2932.

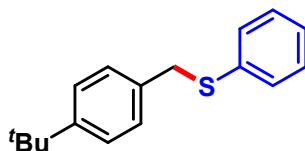

**(4-(tert-butyl)benzyl)(phenyl)sulfane (3ae)**

The title compound 3ae was prepared following the general procedure 4.

**Eluent:** petroleum ether:ethyl acetate (100:0).

**Physical State:** Colourless liquid

**Isolated Yield:** 68%

**<sup>1</sup>H NMR** (400 MHz, CDCl<sub>3</sub>) δ 7.40 – 7.33 (m, 4H), 7.33 – 7.26 (m, 5H), 4.16 (s, 2H), 1.35 (s, 9H).

**<sup>13</sup>C NMR** (101 MHz, CDCl<sub>3</sub>) δ 150.34, 137.07, 134.40, 129.50, 129.00, 128.66, 126.27, 125.64, 38.63, 34.67, 31.51.

**GCMS (m/z):** calcd. 256.1286 for C<sub>17</sub>H<sub>20</sub>S, found 256.1

**IR (thin film, cm<sup>-1</sup>):** 762, 971, 1081, 1257, 1781, 2941.

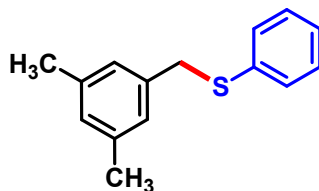

**(3,5-dimethylbenzyl)(phenyl)sulfane (3af)**

The title compound 3af was prepared following the general procedure 4.

**Eluent:** petroleum ether (100%).

**Physical State:** Colourless liquid

**Isolated Yield:** 70%

**<sup>1</sup>H NMR** (500 MHz, CDCl<sub>3</sub>) δ 7.32 (d, *J* = 7.4 Hz, 2H), 7.28 (s, 1H), 7.25 (s, 1H), 7.21 – 7.14 (m, 1H), 6.92 (s, 2H), 6.88 (s, 1H), 4.06 (s, 2H), 2.28 (s, 6H).

**<sup>13</sup>C NMR** (101 MHz, CDCl<sub>3</sub>) δ 138.24, 137.24, 137.03, 129.69, 129.07, 128.99, 126.82, 126.35, 39.12, 21.40.

**HRMS:** [ESI, (+) ve]: calcd. 227.0894 for C<sub>15</sub>H<sub>15</sub>S found: 227.0887.

**IR (thin film, cm<sup>-1</sup>):** 728, 904, 1025, 1090, 1479, 1606, 2253, 2920.

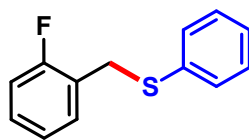

**(2-fluorobenzyl)(phenyl)sulfane (3ag)**

The title compound 3ag was prepared following the general procedure 4.

**Eluent:** petroleum ether (100%).

**Physical State:** Colourless liquid

**Isolated Yield:** 47%

**<sup>1</sup>H NMR** (500 MHz, CDCl<sub>3</sub>) δ 7.39 – 7.35 (m, 2H), 7.29 (dd, *J* = 8.3, 6.5 Hz, 3H), 7.27 – 7.20 (m, 2H), 7.10 – 7.01 (m, 2H), 4.17 (s, 2H).

**<sup>13</sup>C NMR** (126 MHz, CDCl<sub>3</sub>) δ 161.88, 159.91, 135.84, 130.98, 130.95, 130.62, 129.09, 129.03, 129.00, 126.83, 125.02, 124.90, 124.18, 124.15, 115.59, 115.42, 32.32, 32.30.

**HRMS:** [ESI, (+) ve]: cald. 217.0486 for C<sub>13</sub>H<sub>10</sub>FS found 217.0482.

**IR (thin film, cm<sup>-1</sup>):** 736, 906, 1088, 1185, 1232, 1489, 1795, 1948, 2249, 2933, 3062.

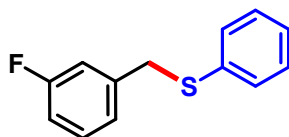

**(3-fluorobenzyl)(phenyl)sulfane (3ah)**

The title compound 3ah was prepared following the general procedure 4.

**Eluent:** petroleum ether (100%).

**Physical State:** Colourless liquid

**Isolated Yield:** 44%

**<sup>1</sup>H NMR** (500 MHz, CDCl<sub>3</sub>) δ 7.37 (dd, *J* = 8.2, 1.5 Hz, 2H), 7.34 – 7.29 (m, 2H), 7.30 – 7.27 (m, 1H), 7.27 – 7.23 (m, 1H), 7.15 – 7.04 (m, 2H), 6.98 (td, *J* = 8.5, 2.6 Hz, 1H), 4.14 (s, 2H).

**<sup>13</sup>C NMR** (126 MHz, CDCl<sub>3</sub>) δ 163.86, 161.91, 140.30, 140.25, 135.82, 130.20, 130.03, 129.97, 129.03, 126.75, 124.56, 124.54, 115.88, 115.70, 114.29, 114.12, 38.76, 38.74.

**HRMS:** [ESI, (+) ve]: cald. 217.0486 for C<sub>13</sub>H<sub>10</sub>FS found 217.0478.

**IR (thin film, cm<sup>-1</sup>):** 732, 785, 909, 1045, 1241, 1373, 1446, 1734, 2256, 2985.

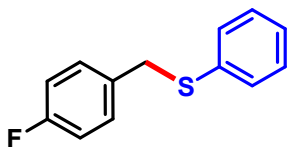

**(3-fluorobenzyl)(phenyl)sulfane (3ai)**

The title compound 3ai was prepared following the general procedure 4.

**Eluent:** petroleum ether (100%).

**Physical State:** Colourless liquid

**Isolated Yield:** 51%

**<sup>1</sup>H NMR** (400 MHz, CDCl<sub>3</sub>) δ 7.32 – 7.27 (m, 3H), 7.22 – 7.16 (m, 3H), 6.99 – 6.90 (m, 2H), 4.07 (s, 2H).

**<sup>13</sup>C NMR** (126 MHz, CDCl<sub>3</sub>) δ 162.95, 161.00, 135.86, 133.28, 133.26, 130.38, 130.32, 130.22, 128.89, 126.60, 115.41, 115.24, 38.46.

**HRMS:** [ESI, (+) ve]: cald. 217.0486 for C<sub>13</sub>H<sub>10</sub>FS found 217.0471.

**IR (thin film, cm<sup>-1</sup>):** 754, 96, 1063, 1232, 1451, 1734, 2276, 2960.

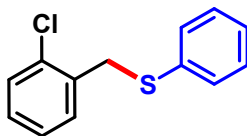

**(2-chlorobenzyl)(phenyl)sulfane (3aj)**

The title compound 3aj was prepared following the general procedure 4.

**Eluent:** petroleum ether (100%).

**Physical State:** Colourless liquid

**Isolated Yield:** 56%

**<sup>1</sup>H NMR** (400 MHz, CDCl<sub>3</sub>) δ 7.35 (ddd, *J* = 12.3, 7.8, 2.1 Hz, 3H), 7.31 – 7.18 (m, 4H), 7.18 – 7.09 (m, 2H), 4.22 (d, *J* = 2.1 Hz, 2H)

**<sup>13</sup>C NMR** (101 MHz, CDCl<sub>3</sub>) δ 135.87, 135.32, 134.17, 130.82, 130.76, 129.76, 129.01, 128.70, 126.88, 126.85, 37.08.

**HRMS:** [ESI, (+) ve]: cald. 233.0191 for C<sub>13</sub>H<sub>10</sub>ClS found 233.0171.

**IR (thin film, cm<sup>-1</sup>):** 691, 758, 928, 1038, 1215, 1476, 1581, 2401, 3020.



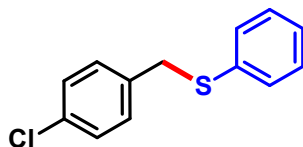

**(4-chlorobenzyl)(phenyl)sulfane (3ak)**

The title compound 3ak was prepared following the general procedure 4.

**Eluent:** petroleum ether (100%).

**Physical State:** Colourless liquid

**Isolated Yield:** 59%

**<sup>1</sup>H NMR** (400 MHz, CDCl<sub>3</sub>) δ 7.31 – 7.27 (m, 3H), 7.25 (d, *J* = 1.7 Hz, 2H), 7.24 – 7.17 (m, 4H), 4.06 (s, 2H).

**<sup>13</sup>C NMR** (101 MHz, CDCl<sub>3</sub>) δ 136.34, 135.85, 133.13, 130.49, 130.30, 129.10, 128.79, 126.88, 38.77.

**HRMS:** [ESI, (+) ve]: cald. 233.0191 for C<sub>13</sub>H<sub>10</sub>ClS found 233.0170.

**IR (thin film, cm<sup>-1</sup>):** 813, 907, 1011, 1095, 1215, 1389, 1475, 1573, 1883, 2925, 3030.

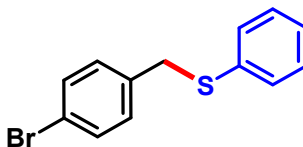

**(4-bromobenzyl)(phenyl)sulfane (3al)**

The title compound 3al was prepared following the general procedure 4.

**Eluent:** petroleum ether (100%).

**Physical State:** Colourless liquid.

**Isolated Yield:** 55%

**<sup>1</sup>H NMR** (400 MHz, CDCl<sub>3</sub>) δ 7.39 (d, *J* = 8.4 Hz, 2H), 7.31 – 7.22 (m, 4H), 7.22 – 7.16 (m, 1H), 7.13 (d, *J* = 8.4 Hz, 2H), 4.04 (s, 2H).

**<sup>13</sup>C NMR** (101 MHz, CDCl<sub>3</sub>) δ 136.84, 135.78, 131.73, 130.64, 130.45, 129.10, 126.87, 121.20, 38.78.

**HRMS:** [ESI, (+) ve]: cald. 276.9687 for C<sub>13</sub>H<sub>10</sub>BrS observed 278.9698.

**IR (thin film, cm<sup>-1</sup>):** 853, 1011, 1235, 1391, 1470, 1887, 2965, 3070.

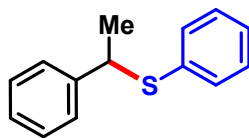

**Phenyl(1-phenylethyl)sulfane (3am)**

The title compound 3am was prepared following the general procedure 4.

**Eluent:** petroleum ether (100%).

**Physical State:** Colourless liquid

**Isolated Yield:** 69%

**<sup>1</sup>H NMR** (500 MHz, CDCl<sub>3</sub>) δ 7.42 – 7.34 (m, 6H), 7.33 – 7.25 (m, 4H), 4.44 (q, *J* = 7.0 Hz, 1H), 1.73 (d, *J* = 7.0 Hz, 3H).

**<sup>13</sup>C NMR** (126 MHz, CDCl<sub>3</sub>) δ 143.33, 135.27, 132.58, 128.80, 128.51, 127.40, 127.25, 127.22, 48.10, 22.47.

**GCMS (m/z):** calcd. 214.0816 for C<sub>14</sub>H<sub>14</sub>S found 214.0.

**IR (thin film, cm<sup>-1</sup>):** 695, 840, 968, 1088, 1221, 1450, 1583, 1802, 1875, 1947, 2970, 3061.

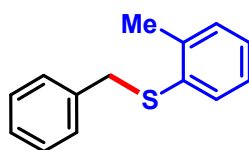

**benzyl(o-tolyl)sulfane (3an)**

The title compound 3an was prepared following the general procedure 4.

**Eluent:** petroleum ether (100%).

**Physical State:** Colourless liquid

**Isolated Yield:** 62%

**<sup>1</sup>H NMR** (500 MHz, CDCl<sub>3</sub>) δ 7.41 – 7.28 (m, 6H), 7.24 – 7.14 (m, 3H), 4.14 (s, 2H), 2.40 (s, 3H).

**<sup>13</sup>C NMR** (126 MHz, CDCl<sub>3</sub>) δ 138.01, 137.40, 135.91, 130.17, 129.06, 129.00, 128.61, 127.31, 126.54, 126.23, 38.43, 20.44.

**GCMS (m/z):** calcd. 214.0816 for C<sub>14</sub>H<sub>14</sub>S found 214.0.

**IR (thin film, cm<sup>-1</sup>):** 695, 854, 916, 1199, 1387, 1476, 1570, 1768, 1947, 2925.

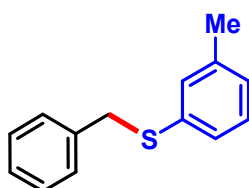

**benzyl(m-tolyl)sulfane (3ao)**

The title compound 3ao was prepared following the general procedure 4.

**Eluent:** petroleum ether (100%).

**Physical State:** Colourless liquid

**Isolated Yield:** 64%

**<sup>1</sup>H NMR** (400 MHz, CDCl<sub>3</sub>) δ 7.33 – 7.27 (m, 5H), 7.24 (d, *J* = 8.2 Hz, 3H), 7.13 – 7.04 (m, 1H), 4.09 (s, 2H), 2.33 (s, 3H).

**<sup>13</sup>C NMR** (101 MHz, CDCl<sub>3</sub>) δ 138.67, 137.64, 136.32, 130.46, 128.97, 128.80, 128.58, 127.27, 127.25, 126.75, 39.07, 21.43.

**GCMS (m/z):** calcd. 214.0816 for C<sub>14</sub>H<sub>14</sub>S found 214.0.

**IR (thin film, cm<sup>-1</sup>):** 685, 876, 976, 1180, 1371, 1416, 1538, 1771, 1949, 2968.

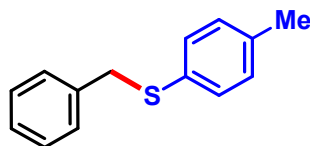**benzyl(m-tolyl)sulfane (3ap)**

The title compound 3ap was prepared following the general procedure 4.

**Eluent:** petroleum ether (100%).

**Physical State:** Colourless liquid

**Isolated Yield:** 65%

**<sup>1</sup>H NMR** (400 MHz, CDCl<sub>3</sub>) δ 7.33 – 7.27 (m, 4H), 7.24 (d, *J* = 8.2 Hz, 3H), 7.13 – 7.04 (m, 2H), 4.09 (s, 2H), 2.33 (s, 3H).

**<sup>13</sup>C NMR** (101 MHz, CDCl<sub>3</sub>) δ 137.96, 136.71, 132.64, 130.86, 129.77, 128.99, 128.59, 127.23, 39.94, 21.21.

**GCMS (m/z):** calcd. 214.0816 for C<sub>14</sub>H<sub>14</sub>S found 214.0.

**IR (thin film, cm<sup>-1</sup>):** 695, 854, 998, 1081, 1238, 1319, 1493, 1591, 1756, 1944, 2920, 3029.

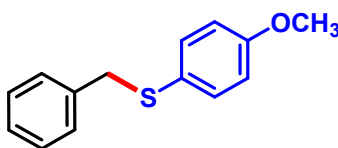**benzyl(4-methoxyphenyl)sulfane (3aq)**

The title compound 3aq was prepared following the general procedure 4.

**Eluent:** petroleum ether:ethyl acetate (99:1).

**Physical State:** Colourless liquid

**Isolated Yield:** 72%

**<sup>1</sup>H NMR** (500 MHz, CDCl<sub>3</sub>) δ 7.33 (ddd, *J* = 7.4, 5.3, 1.9 Hz, 4H), 7.28 (td, *J* = 7.3, 1.5 Hz, 3H), 6.86 (d, *J* = 8.8 Hz, 2H), 4.06 (s, 2H), 3.80 (s, 3H).

**<sup>13</sup>C NMR** (126 MHz, CDCl<sub>3</sub>) δ 159.19, 138.15, 134.00, 128.91, 128.37, 126.99, 126.11, 114.45, 55.23, 41.15.

**GCMS (m/z):** calcd. 230.0765 for C<sub>14</sub>H<sub>14</sub>OS found 230.0.

**IR (thin film, cm<sup>-1</sup>):** 737, 824, 1030, 1177, 1247, 1498, 1580, 1712, 1888, 2050, 2530, 2949.

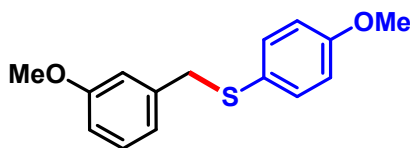

**(3-methoxybenzyl)(4-methoxyphenyl)sulfane (3ar)**

The title compound 3ar was prepared following the general procedure 4.

**Eluent:** petroleum ether:ethyl acetate (96:4).

**Physical State:** Colourless liquid

**Isolated Yield:** 71%

**<sup>1</sup>H NMR** (400 MHz, CDCl<sub>3</sub>) δ 7.29 (d, *J* = 8.7 Hz, 2H), 7.19 (t, *J* = 7.7 Hz, 1H), 6.91 – 6.58 (m, 5H), 3.99 (s, 2H), 3.78 (d, *J* = 1.1 Hz, 3H), 3.76 (d, *J* = 1.1 Hz, 3H).

**<sup>13</sup>C NMR** (101 MHz, CDCl<sub>3</sub>) δ 159.60, 159.25, 139.72, 134.05, 129.39, 126.16, 121.29, 114.49, 114.21, 112.86, 55.33, 55.18, 41.24.

**HRMS:** [ESI, (+) ve] Cald. 260.0871 for C<sub>15</sub>H<sub>16</sub>O<sub>2</sub>S found 260.0852.

**IR (thin film, cm<sup>-1</sup>):** 706, 782, 910, 1102, 1243, 1455, 1491, 1590, 1732, 2043, 2530, 2835.

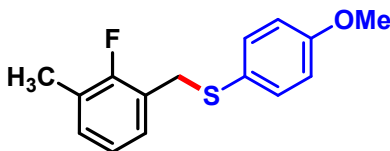

**(2-fluoro-3-methylbenzyl)(4-methoxyphenyl)sulfane (3as)**

The title compound 3as was prepared following the general procedure 4.

**Eluent:** petroleum ether:ethyl acetate (96:4).

**Physical State:** Colourless liquid

**Isolated Yield:** 64%

$^1\text{H}$  NMR (500 MHz,  $\text{CDCl}_3$ )  $\delta$  7.28 (d,  $J = 8.7$  Hz, 2H), 7.04 (td,  $J = 7.1, 2.7$  Hz, 1H), 6.95 – 6.86 (m, 2H), 6.80 (d,  $J = 8.7$  Hz, 2H), 4.00 (d,  $J = 1.1$  Hz, 2H), 3.79 (s, 3H), 2.25 (d,  $J = 2.1$  Hz, 3H).

$^{13}\text{C}$  NMR (126 MHz,  $\text{CDCl}_3$ )  $\delta$  160.42, 159.57, 158.46, 134.73, 130.51, 130.47, 128.49, 128.46, 125.98, 125.08, 124.93, 123.50, 123.46, 114.58, 55.49, 34.70, 34.68, 14.75, 14.72.

**HRMS:** [ESI, (+) ve] Cald. 262.0828  $\text{C}_{15}\text{H}_{15}\text{FOS}$  found 262.0830.

**IR (thin film,  $\text{cm}^{-1}$ ):** 735, 788, 919, 1051, 1247, 1375, 1449, 1732, 2256, 2987.

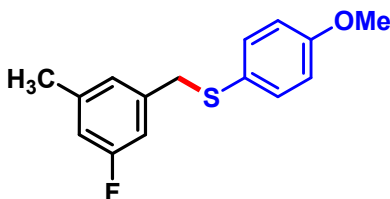

**(3-fluoro-5-methylbenzyl)(4-methoxyphenyl)sulfane (3at)**

The title compound 3at was prepared following the general procedure 4.

**Eluent:** petroleum ether:ethyl acetate (96:4).

**Physical State:** Colourless liquid

**Isolated Yield:** 68%

$^1\text{H}$  NMR (500 MHz,  $\text{CDCl}_3$ )  $\delta$  7.31 (d,  $J = 8.9$  Hz, 2H), 6.85 (d,  $J = 8.8$  Hz, 2H), 6.82 (s, 1H), 6.77 (dd,  $J = 9.5, 5.8$  Hz, 2H), 3.96 (s, 2H), 3.81 (s, 3H), 2.32 (s, 3H).

$^{13}\text{C}$  NMR (126 MHz,  $\text{CDCl}_3$ )  $\delta$  163.76, 161.81, 159.45, 140.40, 140.35, 140.33, 140.28, 134.23, 125.85, 125.43, 125.41, 114.72, 114.60, 114.56, 112.90, 112.73, 55.37, 40.92, 40.91, 21.32, 21.30.

**HRMS:** [ESI, (+) ve] Cald. 262.0828  $\text{C}_{15}\text{H}_{15}\text{FOS}$  found 262.0830.

**IR (thin film,  $\text{cm}^{-1}$ ):** 777, 791, 921, 1049, 1235, 1378, 1452, 1752, 2210, 2991.

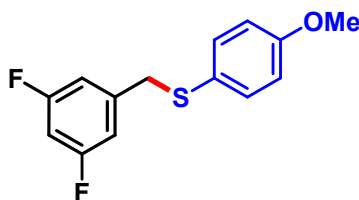

**(3,5-difluorobenzyl)(4-methoxyphenyl)sulfane (3au)**

The title compound 3au was prepared following the general procedure 4.

**Eluent:** petroleum ether:ethyl acetate (96:4).

**Physical State:** Colourless liquid

**Isolated Yield:** 51%

**<sup>1</sup>H NMR** (400 MHz, CDCl<sub>3</sub>) δ 7.25 (d, *J* = 8.8 Hz, 2H), 6.81 (d, *J* = 8.8 Hz, 2H), 6.74 – 6.59 (m, 3H), 3.91 (s, 2H), 3.78 (s, 3H).

**<sup>13</sup>C NMR** (101 MHz, CDCl<sub>3</sub>) δ 164.22, 164.09, 161.75, 161.63, 159.73, 142.46, 134.63, 124.99, 114.74, 111.92, 111.85, 111.74, 111.67, 102.81, 102.55, 102.30, 55.41, 40.87.

**HRMS:** [ESI, (+) ve] Cald. 267.0650 C<sub>14</sub>H<sub>13</sub>F<sub>2</sub>OS found 267.0652.

**IR (thin film, cm<sup>-1</sup>):** 788, 915, 1074, 1228, 1373, 1452, 1752, 2212, 2993.

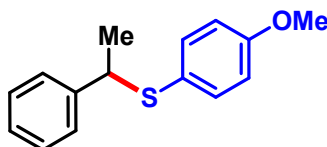

#### (4-methoxyphenyl)(1-phenylethyl)sulfane (3av)

The title compound 3av was prepared following the general procedure 4.

**Eluent:** petroleum ether:ethyl acetate (99:1).

**Physical State:** Colourless liquid

**Isolated Yield:** 71%

**<sup>1</sup>H NMR** (500 MHz, CDCl<sub>3</sub>) δ 7.28 – 7.21 (m, 2H), 7.25 – 7.18 (m, 5H), 6.76 (d, *J* = 8.7 Hz, 2H), 4.17 (q, *J* = 7.0 Hz, 1H), 3.77 (s, 3H), 1.60 (d, *J* = 7.0 Hz, 3H).

**<sup>13</sup>C NMR** (126 MHz, CDCl<sub>3</sub>) δ 159.77, 143.55, 136.18, 128.44, 127.51, 127.17, 125.29, 114.36, 55.44, 49.30, 21.97.

**HRMS:** [ESI, (+) ve]: Cald. 244.0922 for C<sub>15</sub>H<sub>16</sub>OS found 244.0915.

**IR (thin film, cm<sup>-1</sup>):** 698, 967, 1102, 1245, 1373, 1454, 1591, 1678, 1733, 1883, 2044, 2855, 3027.

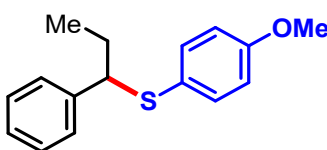

#### (4-methoxyphenyl)(1-phenylpropyl)sulfane (3aw)

The title compound 3aw was prepared following the general procedure 4.

**Eluent:** petroleum ether:ethyl acetate (99:1).

**Physical State:** Colourless liquid

**Isolated Yield:** 72%

**<sup>1</sup>H NMR** (400 MHz, CDCl<sub>3</sub>) δ 7.27 – 7.22 (m, 2H), 7.22 – 7.14 (m, 5H), 6.74 (d, *J* = 8.9 Hz, 2H), 3.88 (dd, *J* = 8.8, 6.2 Hz, 1H), 3.76 (s, 3H), 2.05 – 1.84 (m, 2H), 0.92 (t, *J* = 7.3 Hz, 3H).

**$^{13}\text{C}$  NMR** (101 MHz,  $\text{CDCl}_3$ )  $\delta$  159.48, 142.14, 135.91, 130.93, 129.46, 128.20, 127.93, 126.90, 114.15, 56.63, 55.26, 28.80, 12.35.

**HRMS:** [ESI, (+) ve]: Cald. 258.1078 for  $\text{C}_{16}\text{H}_{18}\text{OS}$  found 259.1132.

**IR (thin film,  $\text{cm}^{-1}$ ):** 756, 830, 916, 1176, 1243, 1460, 1609, 1885, 1949, 2048, 2315, 2543, 2835, 2956.

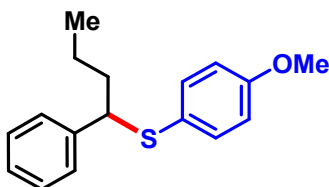

**(4-methoxyphenyl)(1-phenylbutyl)sulfane (3ax)**

The title compound 3ax was prepared following the general procedure 4.

**Eluent:** petroleum ether:ethyl acetate (99:1).

**Physical State:** Colourless liquid

**Isolated Yield:** 69%

**$^1\text{H}$  NMR** (400 MHz,  $\text{CDCl}_3$ )  $\delta$  7.23 (dd,  $J = 7.0, 1.3$  Hz, 2H), 7.22 – 7.06 (m, 5H), 6.73 (d,  $J = 8.8$  Hz, 2H), 3.96 (dd,  $J = 8.6, 6.6$  Hz, 1H), 3.76 (s, 3H), 2.00 – 1.80 (m, 2H), 1.44 – 1.21 (m, 2H), 0.88 (t,  $J = 7.4$  Hz, 3H).

**$^{13}\text{C}$  NMR** (101 MHz,  $\text{CDCl}_3$ )  $\delta$  159.63, 142.62, 136.05, 129.49, 128.34, 128.04, 127.02, 114.29, 55.41, 54.79, 37.95, 20.99, 13.95.

**HRMS:** [ESI, (+) ve]: Cald. 271.1157 for  $\text{C}_{17}\text{H}_{19}\text{OS}$  found 271.1160.

**IR (thin film,  $\text{cm}^{-1}$ ):** 777, 830, 1182, 1477, 1621, 1951, 2021, 2547, 2835, 2956.

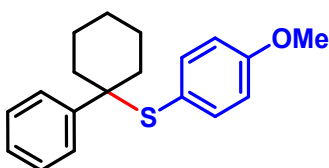

**(4-methoxyphenyl)(1-phenylcyclohexyl)sulfane (3ay)**

The title compound 3ay was prepared following the general procedure 4.

**Eluent:** petroleum ether:ethyl acetate (99:1).

**Physical State:** Colourless liquid

**Isolated Yield:** 74%

**$^1\text{H}$  NMR** (400 MHz,  $\text{CDCl}_3$ )  $\delta$  7.25 – 7.20 (m, 4H), 7.19 – 7.14 (m, 1H), 6.89 (d,  $J = 8.7$  Hz, 2H), 6.66 (d,  $J = 8.7$  Hz, 2H), 3.75 (s, 3H), 2.28 – 2.16 (m, 2H), 2.08 – 1.92 (m, 2H), 1.88 – 1.71 (m, 2H), 1.52 – 1.35 (m, 4H).

**<sup>13</sup>C NMR** (101 MHz, CDCl<sub>3</sub>) δ 160.28, 144.61, 138.73, 128.00, 127.20, 126.30, 122.76, 113.75, 55.37, 55.16, 36.33, 26.11, 23.05.

**HRMS:** [ESI, (+) ve]: cald. 297.1312 for C<sub>19</sub>H<sub>21</sub>OS found 297.1307.

**IR (thin film, cm<sup>-1</sup>):** 667, 751, 828, 895, 1032, 1113, 1173, 1245, 1285, 1446, 1492, 1591, 1889, 2044, 2856, 2932, 3021.

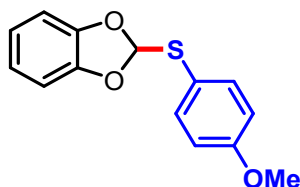

**2-((4-methoxyphenyl)thio)benzo[d][1,3]dioxole (3az)**

The title compound 3az was prepared following the general procedure 4.

**Eluent:** petroleum ether:ethyl acetate (98:2).

**Physical State:** Colourless liquid

**Isolated Yield:** 72%

**<sup>1</sup>H NMR** (400 MHz, CDCl<sub>3</sub>) δ 7.53 (d, *J* = 8.7 Hz, 2H), 7.38 (s, 1H), 6.87 – 6.84 (m, 4H), 6.84 (d, *J* = 3.1 Hz, 2H), 3.79 (s, 3H).

**<sup>13</sup>C NMR** (101 MHz, CDCl<sub>3</sub>) δ 160.76, 146.28, 137.51, 122.30, 119.15, 117.20, 114.75, 109.21, 55.50.

**HRMS:** [ESI, (+) ve]: cald 260.0507 for C<sub>14</sub>H<sub>12</sub>O<sub>3</sub>S found 260.0511.

**IR (thin film, cm<sup>-1</sup>):** 790, 917, 1112, 1257, 1475, 1570, 2143, 2532, 2735.

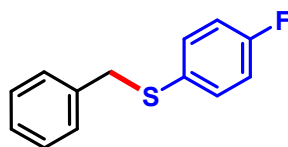

**benzyl(4-fluorophenyl)sulfane (3ba)**

The title compound 3ba was prepared following the general procedure 4.

**Eluent:** petroleum ether (100%).

**Physical State:** Colourless liquid

**Isolated Yield:** 59%

**<sup>1</sup>H NMR** (400 MHz, CDCl<sub>3</sub>) δ 7.33 – 7.20 (m, 7H), 6.96 (t, *J* = 8.7 Hz, 2H), 4.05 (s, 2H).

**<sup>13</sup>C NMR** (101 MHz, CDCl<sub>3</sub>) δ 163.45, 161.00, 137.66, 133.57, 133.50, 130.91, 130.88, 128.99, 128.60, 127.33, 116.15, 115.93, 40.56.

**HRMS:** [ESI, (+) ve]: Cald. 217.04867 for C<sub>13</sub>H<sub>10</sub>FS found 217.0485.

**IR (thin film, cm<sup>-1</sup>):** 826, 906, 1090, 1226, 1489, 1589, 1888, 2250, 2924, 3031.



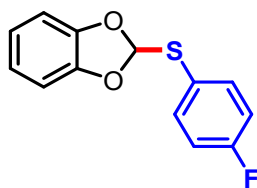

**2-((4-fluorophenyl)thio)benzo[d][1,3]dioxole (3bb)**

The title compound 3bb was prepared following the general procedure 4.

**Eluent:** petroleum ether (100%).

**Physical State:** White solid.

**Isolated Yield:** 76%

**<sup>1</sup>H NMR** (500 MHz, CDCl<sub>3</sub>) δ 7.58 (dd, *J* = 8.7, 5.4 Hz, 2H), 7.42 (s, 1H), 7.00 (t, *J* = 8.6 Hz, 2H), 6.84 (s, 4H).

**<sup>13</sup>C NMR** (126 MHz, CDCl<sub>3</sub>) δ 164.68, 162.69, 146.17, 137.82, 137.76, 122.46, 116.75, 116.73, 116.41, 116.24, 109.25.

**HRMS:** [ESI, (+) ve]: Cald. 248.0307 for C<sub>13</sub>H<sub>9</sub>FO<sub>2</sub>S found 248.0305.

**IR (thin film, cm<sup>-1</sup>):** 790, 927, 1109, 1261, 1458, 1570, 2043, 2532, 2652.

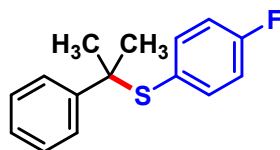

**(4-fluorophenyl)(2-phenylpropan-2-yl)sulfane (3bc)**

The title compound 3bc was prepared following the general procedure 4.

**Eluent:** petroleum ether:ethyl acetate (100:0).

**Physical State:** Colourless liquid

**Isolated Yield:** 61%

**<sup>1</sup>H NMR** (500 MHz, CDCl<sub>3</sub>) δ 7.38 (dd, *J* = 7.7, 1.7 Hz, 2H), 7.31 – 7.25 (m, 2H), 7.24 – 7.16 (m, 1H), 7.13 – 7.01 (m, 2H), 6.86 (t, *J* = 8.7 Hz, 2H), 1.68 (s, 6H).

**<sup>13</sup>C NMR** (126 MHz, CDCl<sub>3</sub>) δ 146.21, 138.76, 138.69, 128.09, 126.80, 126.73, 115.58, 115.41, 29.90, 29.63.

**GCMS (m/z):** cald. 246.0878 for C<sub>15</sub>H<sub>15</sub>FS found 246.0.

**IR (thin film, cm<sup>-1</sup>):** 833, 916, 1078, 1233, 1491, 1578, 1878, 2247, 2932, 3034.

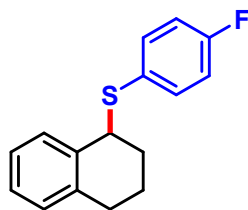

**(4-fluorophenyl)(1,2,3,4-tetrahydronaphthalen-1-yl)sulfane (3bd)**

The title compound 3bd was prepared following the general procedure 4.

**Eluent:** petroleum ether:ethyl acetate (100:0).

**Physical State:** Colourless liquid

**Isolated Yield:** 64%

**<sup>1</sup>H NMR** (400 MHz, CDCl<sub>3</sub>) δ 7.50 – 7.42 (m, 2H), 7.36 (dd, *J* = 6.7, 2.3 Hz, 1H), 7.19 – 7.12 (m, 2H), 7.12 – 7.07 (m, 1H), 7.07 – 6.96 (m, 2H), 4.45 (t, *J* = 4.1 Hz, 1H), 2.94 – 2.60 (m, 2H), 2.36 – 2.10 (m, 1H), 2.02 – 1.87 (m, 2H), 1.86 – 1.67 (m, 1H).

**<sup>13</sup>C NMR** (126 MHz, CDCl<sub>3</sub>) δ 163.61, 161.64, 137.74, 135.56, 135.40, 135.34, 130.94, 130.61, 129.47, 127.32, 125.86, 116.27, 116.10, 48.91, 29.25, 28.55, 18.72.

**GCMS (m/z):** cald. 258.0878 for C<sub>16</sub>H<sub>15</sub>FS found 258.0.

**IR (thin film, cm<sup>-1</sup>):** 835, 9017, 1074, 1231, 1479, 1589, 1887, 2247, 2946, 3052.

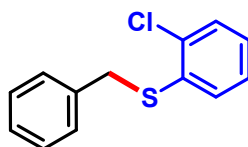

**benzyl(2-chlorophenyl)sulfane (3be)**

The title compound 3be was prepared following the general procedure 4.

**Eluent:** petroleum ether (100%).

**Physical State:** Colourless liquid

**Isolated Yield:** 61%

**<sup>1</sup>H NMR** (400 MHz, CDCl<sub>3</sub>) δ 7.46 – 7.27 (m, 7H), 7.18 (dtd, *J* = 21.9, 7.4, 1.6 Hz, 2H), 4.20 (s, 2H).

**<sup>13</sup>C NMR** (101 MHz, CDCl<sub>3</sub>) δ 136.32, 135.89, 133.55, 129.64, 129.13, 129.11, 128.96, 128.62, 127.44, 127.13, 126.83, 37.46.

**HRMS:** [ESI, (+) ve]: Cald. 233.0192 for C<sub>13</sub>H<sub>10</sub>ClS found 233.0198.

**IR (thin film, cm<sup>-1</sup>):** 743, 907, 1034, 1114, 1237, 1256, 1451, 1494, 1575, 1899, 2925.

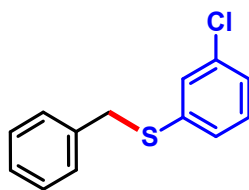

**benzyl(3-chlorophenyl)sulfane (3bf)**

The title compound 3bf was prepared following the general procedure 4.

**Eluent:** petroleum ether (100%).

**Physical State:** Colourless liquid

**Isolated Yield:** 64%

**<sup>1</sup>H NMR** (500 MHz, CDCl<sub>3</sub>) δ 7.40 (d, *J* = 5.1 Hz, 5H), 7.37 – 7.32 (m, 1H), 7.23 (d, *J* = 6.2 Hz, 3H), 4.20 (s, 2H).

**<sup>13</sup>C NMR** (126 MHz, CDCl<sub>3</sub>) δ 138.76, 136.81, 134.62, 129.90, 128.92, 128.68, 127.49, 127.33, 126.33, 38.64

**HRMS:** [ESI, (+) ve]: Cald. 233.0192 for C<sub>13</sub>H<sub>10</sub>ClS found 233.0196.

**IR (thin film, cm<sup>-1</sup>):** 697, 763, 864, 909, 995, 1084, 1164, 1238, 1402, 1460, 1576, 1752, 1945, 2925.

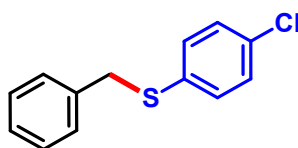

**benzyl(4-chlorophenyl)sulfane (3bg)**

The title compound 3bg was prepared following the general procedure 4.

**Eluent:** petroleum ether (100%).

**Physical State:** White solid.

**Isolated Yield:** 60%

**<sup>1</sup>H NMR** (400 MHz, CDCl<sub>3</sub>) δ 7.35 – 7.27 (m, 5H), 7.24 (s, 4H), 4.11 (s, 2H).

**<sup>13</sup>C NMR** (101 MHz, CDCl<sub>3</sub>) δ 137.20, 134.82, 132.53, 131.45, 129.05, 128.91, 128.66, 127.43, 39.35.

**HRMS:** [ESI, (+) ve]: Cald. 233.0192 for C<sub>13</sub>H<sub>10</sub>ClS observed 233.0196.

**IR (thin film, cm<sup>-1</sup>):** 745, 985, 1164, 1252, 1460, 1581, 1777, 1947, 2951.

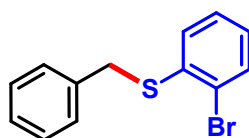

**benzyl(2-bromophenyl)sulfane (3bh)**

The title compound 3bh was prepared following the general procedure 4.

**Eluent:** petroleum ether (100%).

**Physical State:** Colourless liquid

**Isolated Yield:** 59%

**<sup>1</sup>H NMR** (400 MHz, CDCl<sub>3</sub>) δ 7.57 – 7.54 (m, 1H), 7.37 (d, *J* = 7.0 Hz, 2H), 7.34 – 7.24 (m, 3H), 7.21 (dd, *J* = 6.4, 1.6 Hz, 2H), 7.03 (ddd, *J* = 8.5, 6.5, 2.5 Hz, 1H), 4.16 (s, 2H).

**<sup>13</sup>C NMR** (101 MHz, CDCl<sub>3</sub>) δ 138.02, 136.26, 133.06, 129.10, 128.95, 128.75, 127.86, 127.58, 127.04, 123.78, 38.04.

**HRMS:** [ESI, (+) ve]: Cald. 277.9765 for C<sub>13</sub>H<sub>11</sub>BrS observed 277.9768.

**IR (thin film, cm<sup>-1</sup>):** 767, 921, 1110, 1217, 1452, 1517, 1890, 2923, 3029.

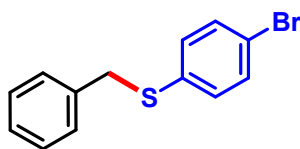

**benzyl(4-bromophenyl)sulfane (3bi)**

The title compound 3bi was prepared following the general procedure 4.

**Eluent:** petroleum ether (100%).

**Physical State:** White solid.

**Isolated Yield:** 58%

**<sup>1</sup>H NMR** (500 MHz, CDCl<sub>3</sub>) δ 7.41 (d, *J* = 8.5 Hz, 2H), 7.38 – 7.33 (m, 4H), 7.33 – 7.28 (m, 1H), 7.20 (d, *J* = 8.5 Hz, 2H), 4.13 (s, 2H).

**<sup>13</sup>C NMR** (126 MHz, CDCl<sub>3</sub>) δ 137.04, 135.57, 131.89, 131.35, 128.84, 128.61, 127.38, 120.29, 39.00.

**HRMS:** [ESI, (+) ve]: Cald. 277.9765 for C<sub>13</sub>H<sub>11</sub>BrS observed 277.9762.

**IR (thin film, cm<sup>-1</sup>):** 758, 908, 1215, 1334, 1472, 1563, 1886, 2923, 3029.

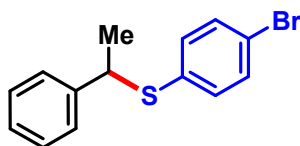

**(4-bromophenyl)(1-phenylethyl)sulfane (3bj)**

The title compound 3bj was prepared following the general procedure 4.

**Eluent:** petroleum ether (100%).

**Physical State:** Colourless liquid

**Isolated Yield:** 64%

**<sup>1</sup>H NMR** (500 MHz, CDCl<sub>3</sub>) δ 7.39 (td, *J* = 5.4, 2.4 Hz, 2H), 7.37 – 7.33 (m, 4H), 7.32 – 7.26 (m, 1H), 7.23 – 7.15 (m, 2H), 4.44 – 4.33 (m, 1H), 1.75 – 1.61 (m, 3H).

**<sup>13</sup>C NMR** (126 MHz, CDCl<sub>3</sub>) δ 142.94, 142.92, 134.39, 134.06, 131.86, 131.84, 128.59, 128.57, 127.42, 127.40, 127.37, 127.35, 121.42, 48.16, 22.36.

**HRMS:** [ESI, (+) ve]: Calcd. 291.9921 for C<sub>14</sub>H<sub>13</sub>BrS observed 291.9923.

**IR (thin film, cm<sup>-1</sup>):** 698, 815, 1090, 1384, 1563, 1802, 1946, 2866, 3028.

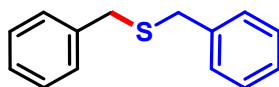

**dibenzylsulfane (3bk)**

The title compound 3bk was prepared following the general procedure 4.

**Eluent:** petroleum ether (100%).

**Physical State:** Colourless liquid

**Isolated Yield:** 61%

**<sup>1</sup>H NMR** (400 MHz, CDCl<sub>3</sub>) δ 7.41 – 7.27 (m, 10H), 3.65 (s, 4H).

**<sup>13</sup>C NMR** (101 MHz, CDCl<sub>3</sub>) δ 138.28, 129.14, 128.60, 127.10, 35.72.

**GCMS (m/z):** calcd. 214.0816 for C<sub>14</sub>H<sub>14</sub>S found 214.3.

**IR (thin film, cm<sup>-1</sup>):** 906, 1028, 1070, 1196, 1236, 1320, 1452, 1493, 1601, 1805, 1878, 1947, 2248, 2916, 3029.

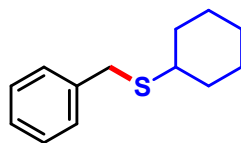

**benzyl(cyclohexyl)sulfane (3bl)**

The title compound 3bl was prepared following the general procedure 4.

**Eluent:** petroleum ether:ethyl acetate (100:0).

**Physical State:** Colourless liquid

**Isolated Yield:** 32%

**<sup>1</sup>H NMR** (400 MHz, CDCl<sub>3</sub>) δ 7.40 – 7.27 (m, 4H), 7.25 – 7.17 (m, 1H), 3.75 (s, 2H), 2.56 (ddt, *J* = 10.5, 7.5, 3.7 Hz, 1H), 2.05 – 1.81 (m, 2H), 1.75 (td, *J* = 6.4, 3.5 Hz, 2H), 1.43 – 1.06 (m, 6H).

**<sup>13</sup>C NMR** (101 MHz, CDCl<sub>3</sub>) δ 139.13, 128.92, 128.61, 126.93, 43.08, 34.76, 33.55, 26.17, 26.04.

**GCMS (m/z):** cald. 206.1129 for C<sub>13</sub>H<sub>18</sub>S observed 206.1.

**IR (thin film, cm<sup>-1</sup>):** 691, 886, 1090, 1263, 1339, 1583, 1877, 1945, 2852, 3059.

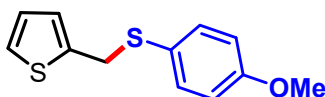

**2-(((4-methoxyphenyl)thio)methyl)thiophene (3bm)**

The title compound 3bm was prepared following the general procedure 4.

**Eluent:** petroleum ether:ethyl acetate (98:2).

**Physical State:** Colourless liquid

**Isolated Yield:** 67%

**<sup>1</sup>H NMR** (500 MHz, CDCl<sub>3</sub>) δ 7.35 – 7.28 (m, 3H), 6.82 (d, *J* = 8.6 Hz, 2H), 6.78 (d, *J* = 3.7 Hz, 1H), 6.48 (d, *J* = 3.7 Hz, 1H), 4.08 (s, 1H), 3.79 (s, 3H).

**<sup>13</sup>C NMR** (126 MHz, CDCl<sub>3</sub>) δ 159.64, 143.40, 134.77, 134.58, 129.35, 126.39, 114.60, 111.15, 55.33, 36.03.

**GCMS (m/z):** cald. 236.0330 for C<sub>12</sub>H<sub>12</sub>OS<sub>2</sub> observed 236.0.

**IR (thin film, cm<sup>-1</sup>):** 677, 878, 1071, 1250, 1341, 1574, 1874, 2895, 3066.

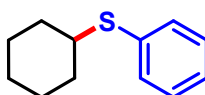

**cyclohexyl(phenyl)sulfane (5aa)**

The title compound 5aa was prepared following the general procedure 4.

**Eluent:** petroleum ether (100%).

**Physical State:** Colourless liquid

**Isolated Yield:** 47%

**<sup>1</sup>H NMR** (400 MHz, CDCl<sub>3</sub>) δ 7.44 – 7.38 (m, 2H), 7.29 (dd, *J* = 8.2, 6.6 Hz, 2H), 7.25 – 7.19 (m, 1H), 3.24 – 3.02 (m, 1H), 2.07 – 1.93 (m, 2H), 1.84 – 1.72 (m, 2H), 1.70 – 1.55 (m, 1H), 1.50 – 1.15 (m, 5H).

**<sup>13</sup>C NMR** (101 MHz, CDCl<sub>3</sub>) δ 135.30, 131.99, 128.88, 126.71, 46.69, 33.48, 26.20, 25.91.

**GCMS (m/z):** calcd. 192.0973 for C<sub>12</sub>H<sub>16</sub>S found 192.0.

**IR (thin film, cm<sup>-1</sup>):** 691, 886, 1090, 1263, 1339, 1583, 1877, 1945, 2852, 3059.

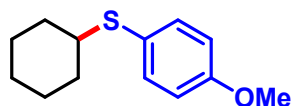

**cyclohexyl(4-methoxyphenyl)sulfane (5ab)**

The title compound 5ab was prepared following the general procedure 4.

**Eluent:** petroleum ether:ethyl acetate (99:1).

**Physical State:** Colourless liquid

**Isolated Yield:** 51%

**<sup>1</sup>H NMR** (500 MHz, CDCl<sub>3</sub>) δ 7.38 (d, *J* = 8.6 Hz, 2H), 6.83 (d, *J* = 8.7 Hz, 2H), 3.80 (s, 3H), 2.99 – 2.81 (m, 1H), 1.92 (d, *J* = 11.3 Hz, 2H), 1.82 – 1.69 (m, 2H), 1.35 – 1.19 (m, 6H).

**<sup>13</sup>C NMR** (126 MHz, CDCl<sub>3</sub>) δ 159.48, 135.77, 125.15, 114.46, 55.49, 48.10, 33.55, 26.30, 25.95.

**HRMS:** [ESI, (+) ve]: Cald 222.1078 for C<sub>13</sub>H<sub>18</sub>OS observed 221.1003.

**IR (thin film, cm<sup>-1</sup>):** 677, 749, 1051, 1107, 1217, 1584, 2024, 2815, 3100.

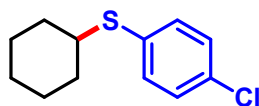

**(4-chlorophenyl)(cyclohexyl)sulfane (5ac)**

The title compound 5ac was prepared following the general procedure 4.

**Eluent:** petroleum ether (100%).

**Physical State:** Colourless liquid

**Isolated Yield:** 45%

**<sup>1</sup>H NMR** (400 MHz, CDCl<sub>3</sub>) δ 7.37 – 7.32 (m, 2H), 7.28 (d, *J* = 1.1 Hz, 2H), 3.29 – 2.87 (m, 1H), 1.98 (ddt, *J* = 9.1, 3.6, 2.0 Hz, 2H), 1.89 – 1.73 (m, 2H), 1.52 – 1.12 (m, 6H).

**<sup>13</sup>C NMR** (101 MHz, CDCl<sub>3</sub>) δ 133.44, 129.53, 129.50, 129.07, 47.08, 33.42, 26.20, 25.88.

**GCMS (m/z):** calcd. 226.0583 for C<sub>12</sub>H<sub>15</sub>ClS found 226.0.

**IR (thin film, cm<sup>-1</sup>):** 668, 762, 928, 1012, 1095, 1214, 1475, 2401, 2855, 2932, 3020.

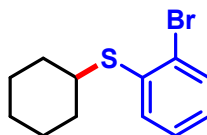

**(2-bromophenyl)(cyclohexyl)sulfane (5ad)**

The title compound 5ad was prepared following the general procedure 4.

**Eluent:** petroleum ether (100%).

**Physical State:** Colourless liquid

**Isolated Yield:** 43%

**<sup>1</sup>H NMR** (400 MHz, CDCl<sub>3</sub>) δ 7.56 (dd, *J* = 8.0, 1.4 Hz, 1H), 7.36 (dd, *J* = 7.9, 1.6 Hz, 1H), 7.26 – 7.21 (m, 1H), 7.04 (ddd, *J* = 7.9, 7.3, 1.6 Hz, 1H), 3.38 – 3.15 (m, 1H), 2.14 – 1.93 (m, 2H), 1.90 – 1.74 (m, 2H), 1.52 – 1.16 (m, 6H).

**<sup>13</sup>C NMR** (101 MHz, CDCl<sub>3</sub>) δ 133.35, 131.05, 128.91, 127.86, 127.73, 127.31, 45.79, 33.13, 26.19, 25.94.

**HRMS:** [ESI, (+) ve]: Calcd. 269.0000 for C<sub>12</sub>H<sub>14</sub>BrS observed 270.9957.

**IR (thin film, cm<sup>-1</sup>):** 670, 777, 974, 1254, 1457, 2499, 2847, 3027.

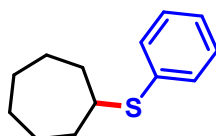

#### cycloheptyl(phenyl)sulfane (5ae)

The title compound 5ae was prepared following the general procedure 4.

**Eluent:** petroleum ether (100%).

**Physical State:** Colourless liquid

**Isolated Yield:** 49%

**<sup>1</sup>H NMR** (400 MHz, CDCl<sub>3</sub>) δ 7.42 (dd, *J* = 7.5, 1.7 Hz, 2H), 7.32 (dd, *J* = 8.4, 6.8 Hz, 2H), 7.27 – 7.20 (m, 1H), 3.38 (tt, *J* = 9.0, 4.2 Hz, 1H), 2.19 – 1.98 (m, 2H), 1.85 – 1.71 (m, 2H), 1.72 – 1.58 (m, 6H), 1.56 – 1.45 (m, 2H).

**<sup>13</sup>C NMR** (101 MHz, CDCl<sub>3</sub>) δ 136.37, 131.29, 128.90, 126.43, 48.06, 34.77, 28.38, 26.08.

**GCMS (m/z):** calcd. 206.1129 for C<sub>13</sub>H<sub>18</sub>S found 206.1.

**IR (thin film, cm<sup>-1</sup>):** 751, 886, 1090, 1263, 1341, 1882, 1950, 2872, 3061.

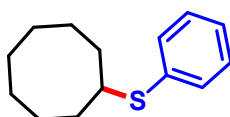

#### cyclooctyl(phenyl)sulfane (5af)

The title compound 5af was prepared following the general procedure 4.

**Eluent:** petroleum ether (100%).

**Physical State:** Colourless liquid

**Isolated Yield:** 51%

**<sup>1</sup>H NMR** (400 MHz, CDCl<sub>3</sub>) δ 7.42 – 7.36 (m, 2H), 7.29 (t, *J* = 7.6 Hz, 2H), 7.25 – 7.16 (m, 1H), 3.41 (tt, *J* = 8.9, 3.8 Hz, 1H), 1.98 (ddt, *J* = 15.0, 8.4, 3.4 Hz, 2H), 1.82 – 1.73 (m, 2H), 1.73 – 1.65 (m, 2H), 1.64 – 1.46 (m, 8H).



$^{13}\text{C}$  NMR (101 MHz,  $\text{CDCl}_3$ )  $\delta$  136.28, 131.51, 128.93, 126.52, 47.79, 32.10, 27.27, 25.99, 25.31.

GCMS ( $m/z$ ): calcd. 220.1286 for  $\text{C}_{14}\text{H}_{20}\text{S}$  found 220.1.

IR (thin film,  $\text{cm}^{-1}$ ): 753, 887, 1091, 1271, 1352, 1891, 1970, 2901, 3066.

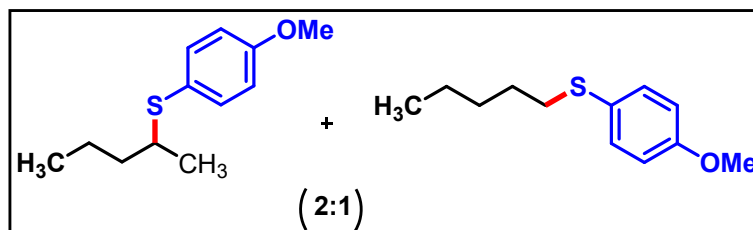

(4-methoxyphenyl)(pentan-2-yl)sulfane + (4-methoxyphenyl)(pentyl)sulfane (2:1) (5ag)

The title compound 5ag was prepared following the general procedure 4.

**Eluent:** petroleum ether:ethyl acetate (99:1).

**Physical State:** Colourless liquid

**Isolated Yield:** 45%

$^1\text{H}$  NMR (500 MHz,  $\text{CDCl}_3$ )  $\delta$  7.38 (d,  $J$  = 8.8 Hz, 2H), 6.84 (d,  $J$  = 8.8 Hz, 2H), 3.80 (s, 3H), 3.01 (m, 0.74H), 2.78(t, 0.33H), 1.54 – 1.38 (m, 5H), 1.21 (d,  $J$  = 6.7 Hz, 2H), 1.00 (t,  $J$  = 7.4 Hz, 1H), 0.90 (t,  $J$  = 7.1 Hz, 2H).

$^{13}\text{C}$  NMR (126 MHz,  $\text{CDCl}_3$ )  $\delta$  159.49, 159.37, 135.81, 135.67, 125.41, 115.19, 114.48, 55.49, 44.54, 38.92, 26.73, 21.27, 20.43, 14.10, 11.40.

HRMS: [ESI, (+) ve]: Cald. 210.1078 for  $\text{C}_{12}\text{H}_{18}\text{OS}$  observed 210.1062.

IR (thin film,  $\text{cm}^{-1}$ ): 668, 751, 1035, 1102, 1214, 1478, 1592, 2043, 2872, 2961, 3136.

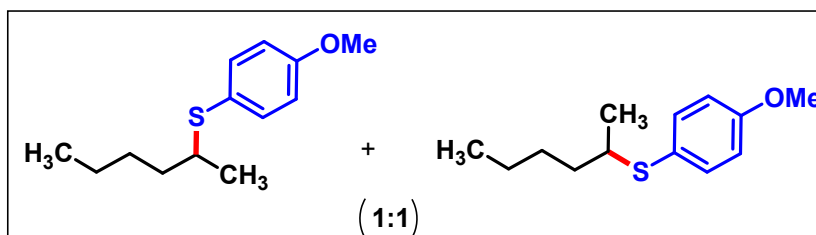

hexan-2-yl(4-methoxyphenyl)sulfane:hexan-2-yl(4-methoxyphenyl)sulfane (1:1) (5ah)

The title compound 5ah was prepared following the general procedure 4.

**Eluent:** petroleum ether:ethyl acetate (99:1).

**Physical State:** Colourless liquid

**Isolated Yield:** 43%

**<sup>1</sup>H NMR** (400 MHz, CDCl<sub>3</sub>) δ 7.38 (d, *J* = 3.4 Hz, 1H), 7.36 (d, *J* = 3.4 Hz, 1H), 6.84 (d, *J* = 3.4 Hz, 1H), 6.82 (d, *J* = 3.3 Hz, 1H), 3.80 (d, *J* = 1.3 Hz, 3H), 3.09 – 2.93 (m, 0.5H), 2.88 – 2.71 (m, 0.5H), 1.48 (tt, *J* = 4.5, 1.3 Hz, 1H), 1.43 – 1.36 (m, 2H), 1.33 – 1.23 (m, 3H), 1.21 (d, *J* = 6.7 Hz, 2H), 0.99 (t, *J* = 7.4 Hz, 1H), 0.89 (t, *J* = 7.2 Hz, 3H).

**<sup>13</sup>C NMR** (101 MHz, CDCl<sub>3</sub>) δ 159.50, 159.39, 135.80, 135.69, 125.69, 125.47, 114.49, 55.49, 52.00, 44.82, 36.45, 36.25, 29.44, 27.28, 22.76, 21.30, 20.23, 14.21, 14.18, 11.29.

**HRMS:** [ESI, (+) ve]: cald. 223.1157 for C<sub>13</sub>H<sub>20</sub>OS observed 223.1141.

**IR (thin film, cm<sup>-1</sup>):** 679, 1041, 1275, 1471, 1587, 2015, 2961, 3130.

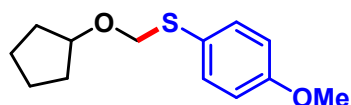

**((cyclopentyloxy)methyl)(4-methoxyphenyl)sulfane (5ai)**

The title compound 5ai was prepared following the general procedure 4.

**Eluent:** petroleum ether:ethyl acetate (98:2).

**Physical State:** Colourless liquid

**Isolated Yield:** 65%

**<sup>1</sup>H NMR** (400 MHz, CDCl<sub>3</sub>) δ 7.43 (d, *J* = 8.9 Hz, 2H), 6.84 (d, *J* = 8.8 Hz, 2H), 4.84 (s, 1H), 4.42 – 4.29 (m, 1H), 3.79 (s, 3H), 1.82 – 1.60 (m, 6H), 1.57 – 1.50 (m, 2H).

**<sup>13</sup>C NMR** (101 MHz, CDCl<sub>3</sub>) δ 159.36, 133.76, 126.44, 114.65, 78.87, 75.42, 55.48, 32.19, 23.70.

**HRMS:** [ESI, (+) ve]: cald. [M + H]<sup>+</sup>: 239.1100 for C<sub>13</sub>H<sub>19</sub>O<sub>2</sub>S Found 239.1098

**IR (thin film, cm<sup>-1</sup>):** 698, 749, 1051, 1107, 1217, 1584, 2024, 2815, 3100.

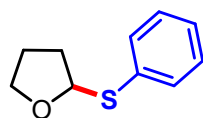

**2-(phenylthio)tetrahydrofuran (5aj)**

The title compound 5aj was prepared following the general procedure 4.

**Eluent:** petroleum ether:ethyl acetate (100:0).

**Physical State:** Colourless liquid

**Isolated Yield:** 65%

**<sup>1</sup>H NMR** (400 MHz, CDCl<sub>3</sub>) δ 7.57 – 7.49 (m, 2H), 7.36 – 7.28 (m, 2H), 7.27 – 7.20 (m, 1H), 5.66 (dd, *J* = 7.2, 3.8 Hz, 1H), 4.09 – 3.88 (m, 2H), 2.37 (dtd, *J* = 12.2, 7.3, 4.7 Hz, 1H), 2.09 – 1.82 (m, 3H).

**<sup>13</sup>C NMR** (101 MHz, CDCl<sub>3</sub>) δ 135.79, 131.08, 128.87, 126.83, 87.18, 67.32, 32.71, 24.92.

**HR-ESI-MS (m/z):** calcd. for C<sub>10</sub>H<sub>12</sub>OSNa [M + Na]<sup>+</sup>: 203.0501, found 203.0502.

**IR (thin film, cm<sup>-1</sup>):** 698, 750, 1032, 1177, 1235, 1575, 2024, 2817, 3117.

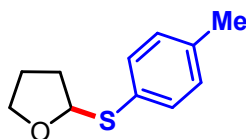

**2-(*p*-tolylthio)tetrahydrofuran (5ak)**

The title compound 5ak was prepared following the general procedure 4.

**Eluent:** petroleum ether:ethyl acetate (100:0).

**Physical State:** Colourless liquid

**Isolated Yield:** 68%

**<sup>1</sup>H NMR** (400 MHz, CDCl<sub>3</sub>) δ 7.47 – 7.31 (m, 2H), 7.11 (dd, *J* = 8.2, 3.1 Hz, 2H), 5.57 (dd, *J* = 7.2, 3.8 Hz, 1H), 4.06 – 3.90 (m, 2H), 2.39 – 2.35 (m, 1H), 2.32 (s, 3H), 2.07 – 1.79 (m, 3H).

**HR-ESI-MS (m/z):** calcd. for C<sub>11</sub>H<sub>14</sub>OSNa [M + Na]<sup>+</sup>: 217.0658, found 217.0663

**IR (thin film, cm<sup>-1</sup>):** 691, 732, 1025, 1171, 1555, 2014, 2857, 3129.

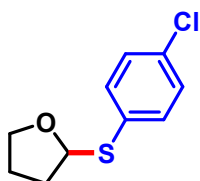

**2-((4-chlororophenyl)thio)tetrahydrofuran (5al)**

The title compound 5al was prepared following the general procedure 4.

**Eluent:** petroleum ether:ethyl acetate (100:0).

**Physical State:** Colourless liquid

**Isolated Yield:** 61%

**<sup>1</sup>H NMR** (400 MHz, CDCl<sub>3</sub>) δ 7.43 (d, *J* = 8.6 Hz, 2H), 7.25 (d, *J* = 8.6 Hz, 2H), 5.60 (dd, *J* = 7.3, 3.8 Hz, 1H), 4.17 – 3.69 (m, 2H), 2.35 (ddt, *J* = 12.1, 6.9, 3.1 Hz, 1H), 2.13 – 1.78 (m, 3H).

**<sup>13</sup>C NMR** (101 MHz, CDCl<sub>3</sub>) δ 134.38, 133.00, 132.48, 129.00, 87.32, 67.38, 32.69, 24.91.

**HR-ESI-MS (m/z):** calcd. for C<sub>10</sub>H<sub>11</sub>ClOSNa [M + Na]<sup>+</sup>: 237.0111, found 237.0109.

**IR (thin film, cm<sup>-1</sup>):** 671, 735, 1023, 1175, 1246, 1575, 2021, 2845, 3121.

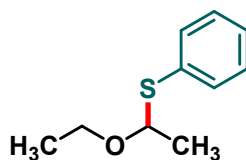

**(1-ethoxyethyl)(phenyl)sulfane (5am)**

The title compound 5am was prepared following the general procedure 4.

**Eluent:** petroleum ether:ethyl acetate (100:0).

**Physical State:** Colourless liquid

**Isolated Yield:** 73%

**<sup>1</sup>H NMR** (500 MHz, CDCl<sub>3</sub>) δ 7.48 (dd, *J* = 7.9, 1.8 Hz, 2H), 7.34 – 7.25 (m, 3H), 4.90 (q, *J* = 6.3 Hz, 1H), 4.01 – 3.91 (m, 1H), 3.56 – 3.45 (m, 1H), 1.51 (d, *J* = 6.2 Hz, 3H), 1.23 (t, *J* = 7.0 Hz, 3H).

**<sup>13</sup>C NMR** (126 MHz, CDCl<sub>3</sub>) δ 133.86, 133.01, 128.71, 127.54, 84.54, 63.39, 22.71, 14.94.

**HR-ESI-MS (m/z):** calcd 182.0765 for C<sub>9</sub>H<sub>12</sub>OS [M]<sup>+</sup> : found 182.0764.

**IR (thin film, cm<sup>-1</sup>):** 694, 798, 1054, 1178, 1541, 2017, 2861, 3133.

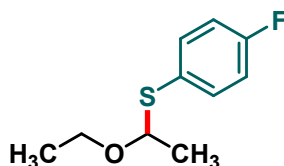

**(1-ethoxyethyl)(4-fluorophenyl)sulfane (5an)**

The title compound 5an was prepared following the general procedure 4.

**Eluent:** petroleum ether:ethyl acetate (100:0).

**Physical State:** Colourless liquid

**Isolated Yield:** 71%

**<sup>1</sup>H NMR** (500 MHz, CDCl<sub>3</sub>) δ 7.44 (dd, *J* = 8.7, 5.5 Hz, 2H), 7.00 (t, *J* = 8.7 Hz, 2H), 4.80 (q, *J* = 6.2 Hz, 1H), 3.95 (dq, *J* = 9.3, 7.1 Hz, 1H), 3.48 (dq, *J* = 9.3, 7.0 Hz, 1H), 1.45 (d, *J* = 6.4 Hz, 3H), 1.22 (t, *J* = 7.0 Hz, 3H).

**<sup>13</sup>C NMR** (126 MHz, CDCl<sub>3</sub>) δ 163.85, 161.88, 136.59, 136.52, 127.66, 127.63, 115.97, 115.80, 84.59, 63.56, 22.66, 15.00.

**HRMS:** [ESI, (+) ve]: calcd for 200.0671 for [M]<sup>+</sup> : C<sub>10</sub>H<sub>13</sub>FOS found 200.0669.

**IR (thin film, cm<sup>-1</sup>):** 678, 741, 1059, 1157, 1541, 2022, 2897, 3152

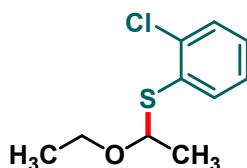

**(1-ethoxyethyl)(2-chlorophenyl)sulfane (5ao)**

The title compound 5ao was prepared following the general procedure 4.

**Eluent:** petroleum ether:ethyl acetate (100:0).

**Physical State:** Colourless liquid

**Isolated Yield:** 68%

**<sup>1</sup>H NMR** (500 MHz, CDCl<sub>3</sub>) δ 7.67 – 7.57 (m, 1H), 7.40 (dd, *J* = 7.1, 2.3 Hz, 1H), 7.24 – 7.10 (m, 2H), 5.08 – 5.03 (m, 1H), 3.98 – 3.81 (m, 1H), 3.64 – 3.42 (m, 1H), 1.57 (dd, *J* = 6.4, 0.8 Hz, 3H), 1.20 (t, *J* = 7.0 Hz, 3H).

**<sup>13</sup>C NMR** (126 MHz, CDCl<sub>3</sub>) δ 136.81, 134.52, 133.32, 129.91, 128.46, 127.07, 84.43, 63.12, 22.41, 15.08.

**HRMS:** [ESI, (+) ve]: calcd. 239.0268 for C<sub>10</sub>H<sub>13</sub>ClOSNa [M + Na]<sup>+</sup> found 239.0256.

**IR (thin film, cm<sup>-1</sup>):** 681, 733, 1063, 1175, 1526, 2027, 2888, 3175

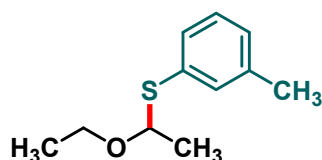**(1-ethoxyethyl)(*m*-tolyl)sulfane (5ap)**

The title compound 5ap was prepared following the general procedure 4.

**Eluent:** petroleum ether:ethyl acetate (100:0).

**Physical State:** Colourless liquid

**Isolated Yield:** 74%

**<sup>1</sup>H NMR** (500 MHz, CDCl<sub>3</sub>) δ 7.32 (d, *J* = 8.1 Hz, 2H), 7.20 (t, *J* = 7.5 Hz, 1H), 7.10 (d, *J* = 7.6 Hz, 1H), 4.91 (q, *J* = 6.3 Hz, 1H), 3.98 (dq, *J* = 9.2, 7.1 Hz, 1H), 3.52 (dq, *J* = 9.3, 7.0 Hz, 1H), 2.35 (s, 3H), 1.54 (d, *J* = 6.3 Hz, 3H), 1.26 (t, *J* = 7.0 Hz, 3H).

**<sup>13</sup>C NMR** (126 MHz, CDCl<sub>3</sub>) δ 138.39, 134.44, 132.83, 130.83, 128.56, 128.39, 84.55, 63.35, 22.79, 21.35, 14.99.

**HRMS:** [ESI, (+) ve]: calcd. 197.0989 for C<sub>11</sub>H<sub>17</sub>OS for [M+H]<sup>+</sup> found 197.0987

**IR (thin film, cm<sup>-1</sup>):** 687, 729, 1052, 1167, 1523, 2019, 2879, 3154

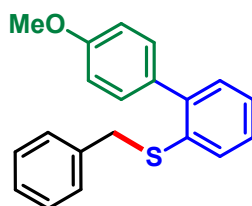**benzyl(4'-methoxy-[1,1'-biphenyl]-2-yl)sulfane (7)**

The title compound 7 was prepared according to the literature procedure.<sup>1</sup>

**Eluent:** petroleum ether:ethyl acetate (98:2).

**Physical State:** White solid.

**Isolated Yield:** 92%

**<sup>1</sup>H NMR** (400 MHz, CDCl<sub>3</sub>) δ 7.42 – 7.38 (m, 1H), 7.36 (d, *J* = 8.6 Hz, 2H), 7.30 – 7.19 (m, 8H), 6.97 (d, *J* = 8.7 Hz, 2H), 3.97 (s, 2H), 3.86 (s, 3H).

**<sup>13</sup>C NMR** (101 MHz, CDCl<sub>3</sub>) δ 159.10, 142.17, 137.14, 135.52, 133.19, 130.69, 130.54, 129.04, 128.90, 128.55, 127.87, 127.67, 127.24, 126.07, 114.31, 113.57, 55.38, 38.53.

**HRMS:** [ESI, (+) ve]: Calcd. 306.1078 for C<sub>20</sub>H<sub>18</sub>OS found 306.1082.

**IR (thin film, cm<sup>-1</sup>):** 732, 827, 905, 1031, 1102., 1174, 1244, 1285, 1460, 1492, 1592, 1677, 1885, 2044, 2251, 2963, 3028.

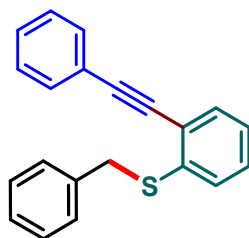

#### benzyl(2-(phenylethynyl)phenyl)sulfane (8)

The title compound 8 was prepared according to the literature procedure.<sup>2</sup>

**Eluent:** petroleum ether (100%).

**Physical State:** Colourless liquid.

**Isolated Yield:** 70%

**<sup>1</sup>H NMR** (400 MHz, CDCl<sub>3</sub>) δ 7.62 – 7.54 (m, 2H), 7.41 – 7.33 (m, 5H), 7.33 – 7.27 (m, 4H), 7.25 – 7.15 (m, 3H), 4.23 (s, 2H).

**<sup>13</sup>C NMR** (101 MHz, CDCl<sub>3</sub>) δ 139.68, 137.00, 132.77, 131.82, 129.11, 128.79, 128.69, 128.60, 128.50, 128.37, 128.04, 127.41, 125.70, 123.35, 95.67, 87.42, 37.71.

**HRMS:** [ESI, (+) ve]: calcd. 300.0973 for C<sub>21</sub>H<sub>16</sub>S observed 300.0957.

**IR (thin film, cm<sup>-1</sup>):** 2943, 2210, 1617, 1463, 1323, 1125, 1064, 842.

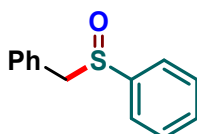

#### (benzylsulfinyl)benzene (9)

The title compound 9 was prepared according to the literature procedure.<sup>3</sup>

**Eluent:** petroleum ether:ethyl acetate (60:40).

**Physical State:** White solid

**Isolated Yield:** 85%

**<sup>1</sup>H NMR** (400 MHz, CDCl<sub>3</sub>) δ 7.53 – 7.30 (m, 5H), 7.28 – 7.11 (m, 3H), 6.95 (dd, *J* = 8.0, 1.7 Hz, 2H), 4.22 – 3.74 (m, 2H).

**<sup>13</sup>C NMR** (101 MHz, CDCl<sub>3</sub>) δ 142.75, 131.16, 130.36, 129.14, 128.85, 128.43, 128.23, 124.41, 63.51.

**GCMS (m/z):** Calcd. 216.0609 for C<sub>13</sub>H<sub>12</sub>OS found 216.2.

**IR (thin film, cm<sup>-1</sup>):** 775, 930, 1072, 1247, 1372, 2876.

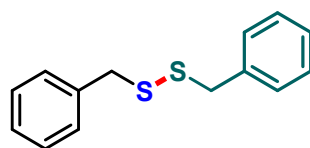

### 1,2-dibenzyl disulfane (10)

The title compound 10 was prepared according to the literature procedure.<sup>4</sup>

**Eluent:** petroleum ether (100%).

**Physical State:** White solid

**Isolated Yield:** 25%

**<sup>1</sup>H NMR** (400 MHz, CDCl<sub>3</sub>) δ 7.36 – 7.28 (m, 6H), 7.27 – 7.23 (m, 4H), 3.62 (s, 4H).

**<sup>13</sup>C NMR** (101 MHz, CDCl<sub>3</sub>) δ 137.53, 129.59, 128.65, 127.60, 43.43.

**GCMS (m/z):** Calcd. 246.0537 for C<sub>14</sub>H<sub>14</sub>S<sub>2</sub> found 246.3.

**IR (thin film, cm<sup>-1</sup>):** 755, 918, 1082, 1227, 2832, 2875.

## 7. References

1. Bag, S.; Patra, T.; Modak, A.; Deb, A.; Maity, S.; Dutta, U.; Dey, A.; Kancharla, R.; Maji, A.; Hazra, A.; Bera, M.; Maiti, D. Remote Para-C–H Functionalization of Arenes by a D-Shaped Biphenyl Template-Based Assembly. *J. Am. Chem. Soc.* 2015, *137* (37), 11888–11891.
2. Liu, M.; Sun, J.; Erbay, T. G.; Ni, H.-Q.; Martín-Montero, R.; Liu, P.; Engle, K. M. PdII-Catalyzed C(Alkenyl)–H Activation Facilitated by a Transient Directing Group\*\*. *Angewandte Chemie International Edition* 2022, *61* (25), e202203624.
3. Pospíšil, J.; Markó, I. E. Total Synthesis of Jerangolid D. *J. Am. Chem. Soc.* 2007, *129* (12), 3516–3517.
4. Seguchi, K.; Hirota, S. Photo-oxidation of aryl ethers in the presence of ferric chloride. *Chem. Lett.* 1982, *11* (3), 385–386.

# ***NMR Spectra***



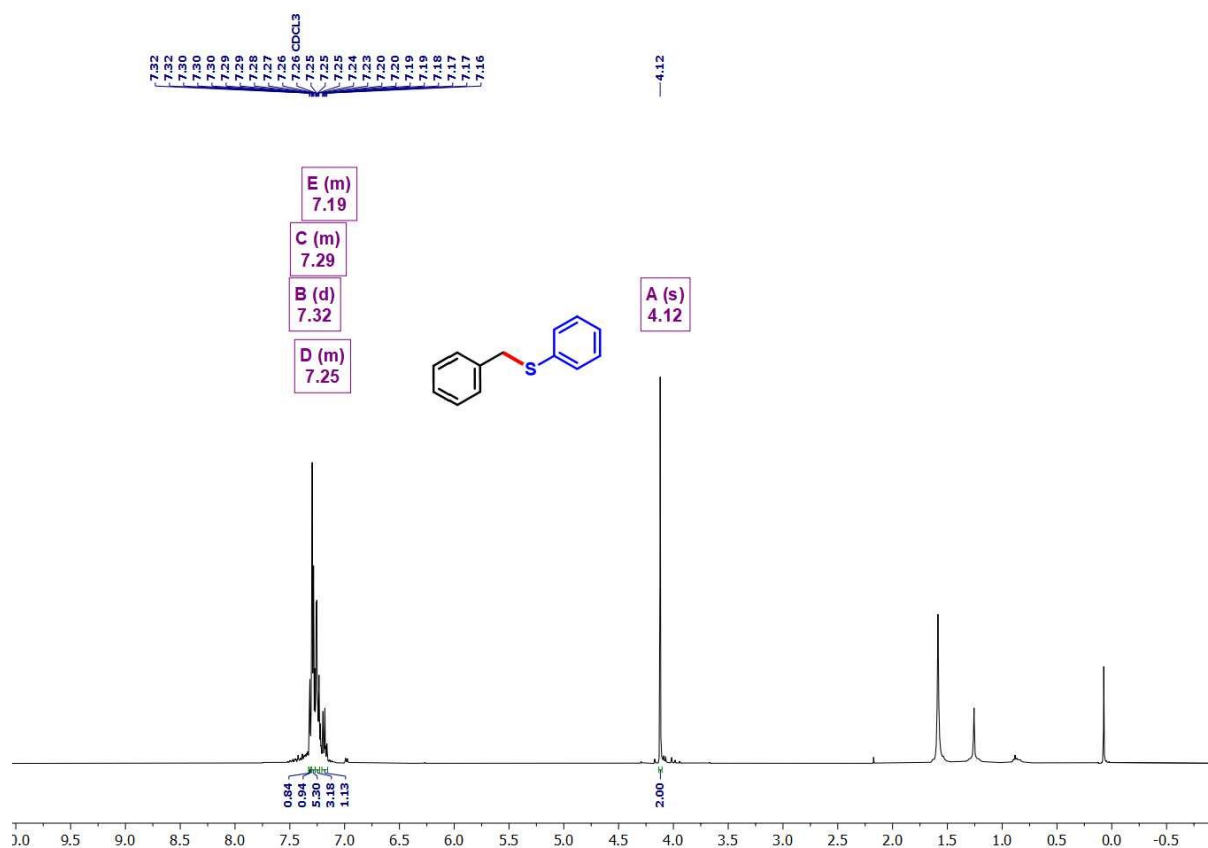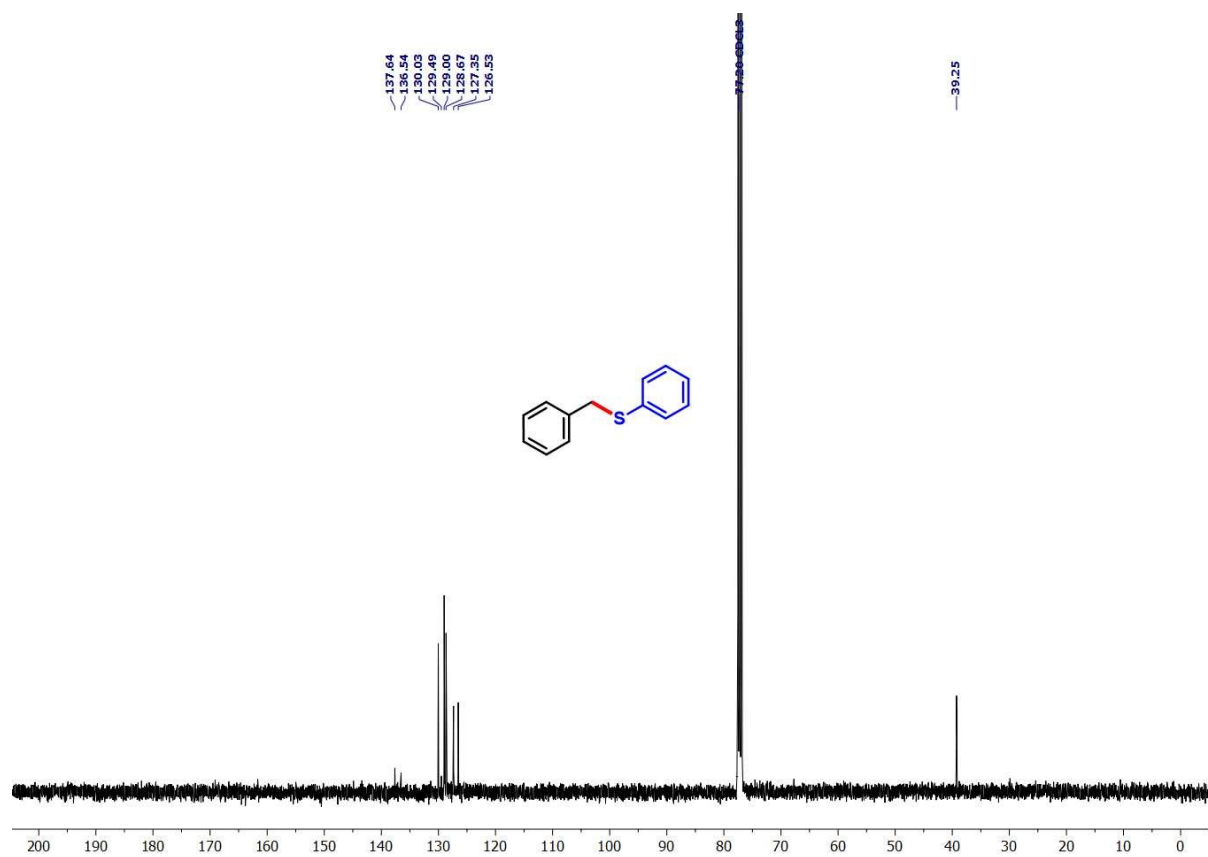

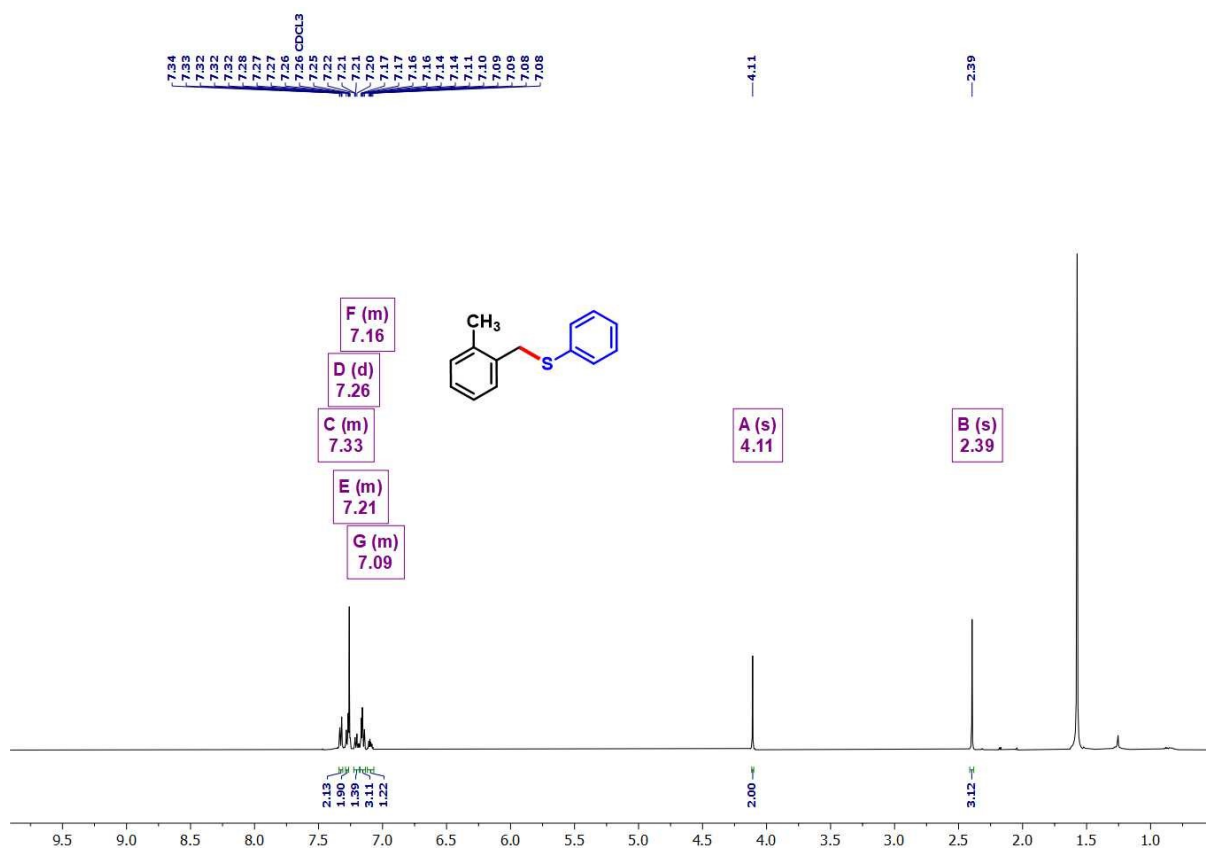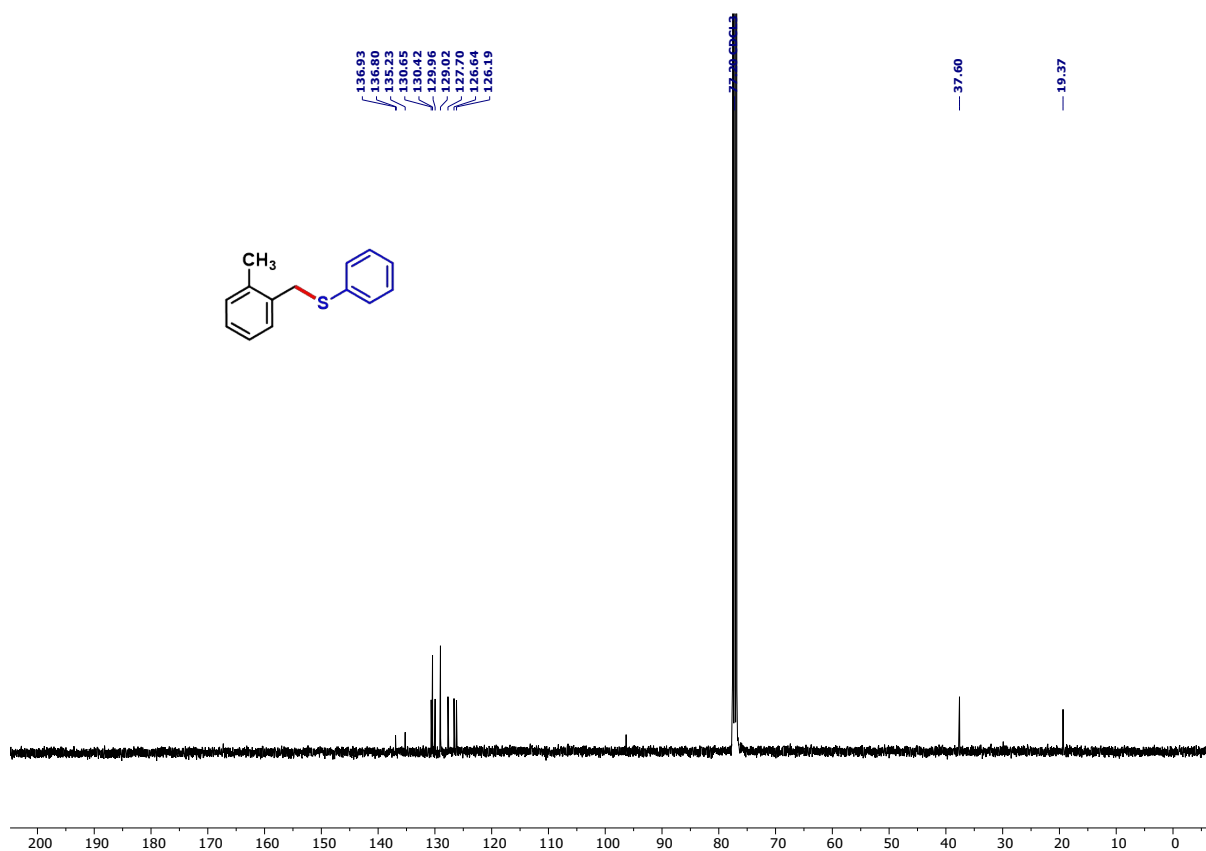

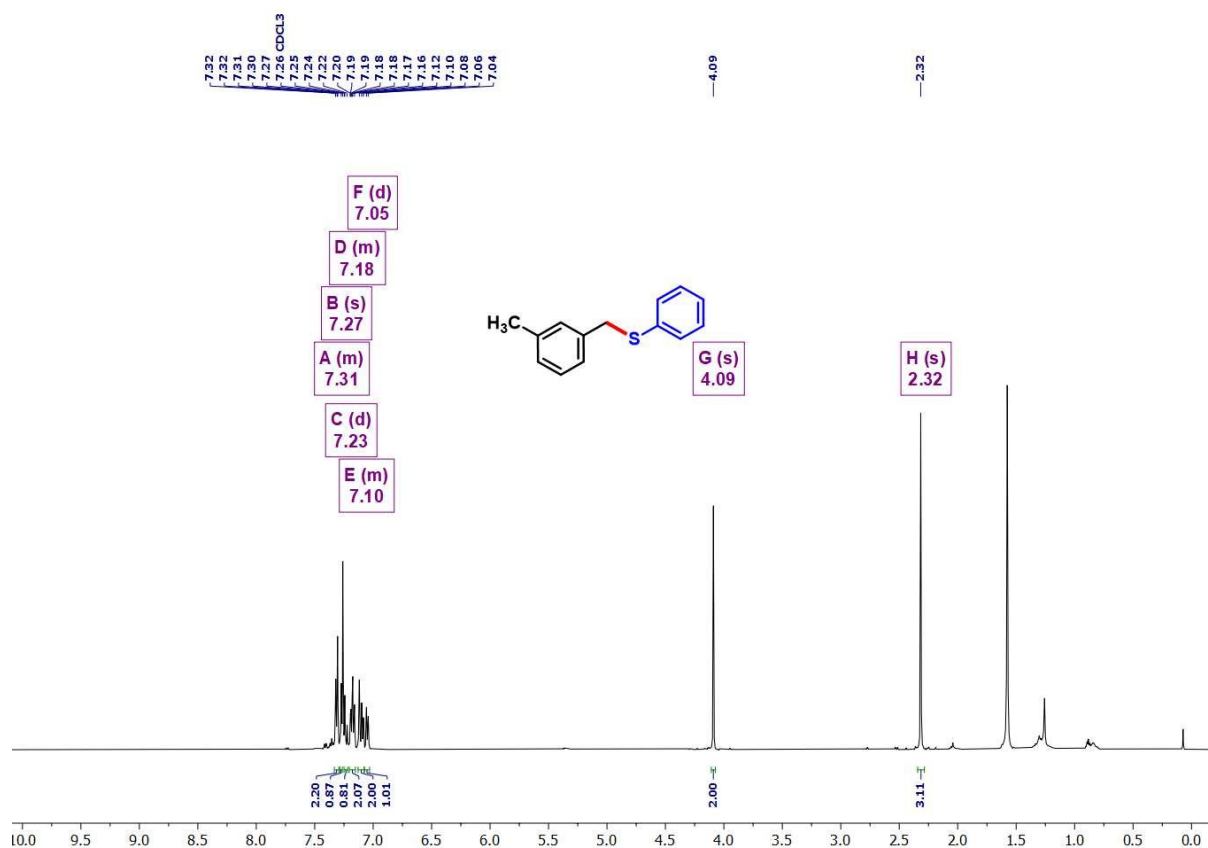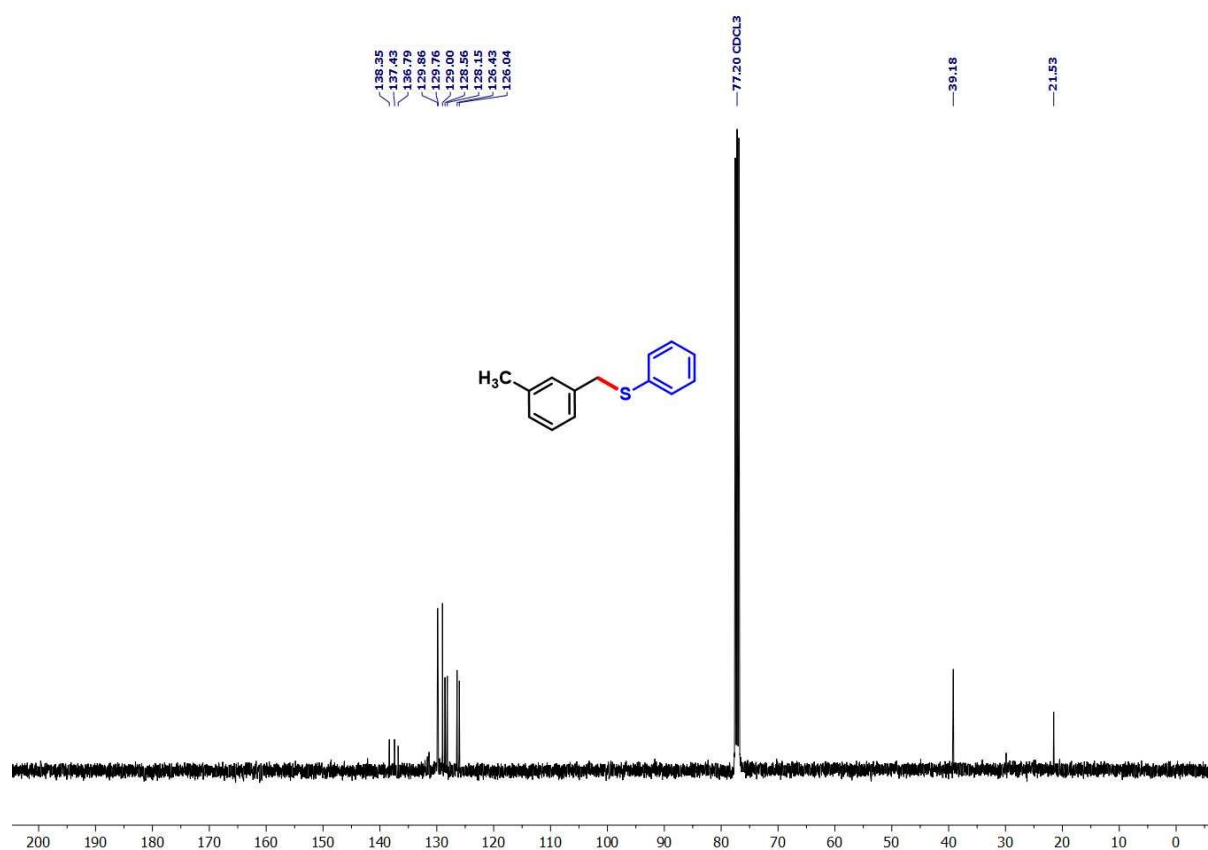

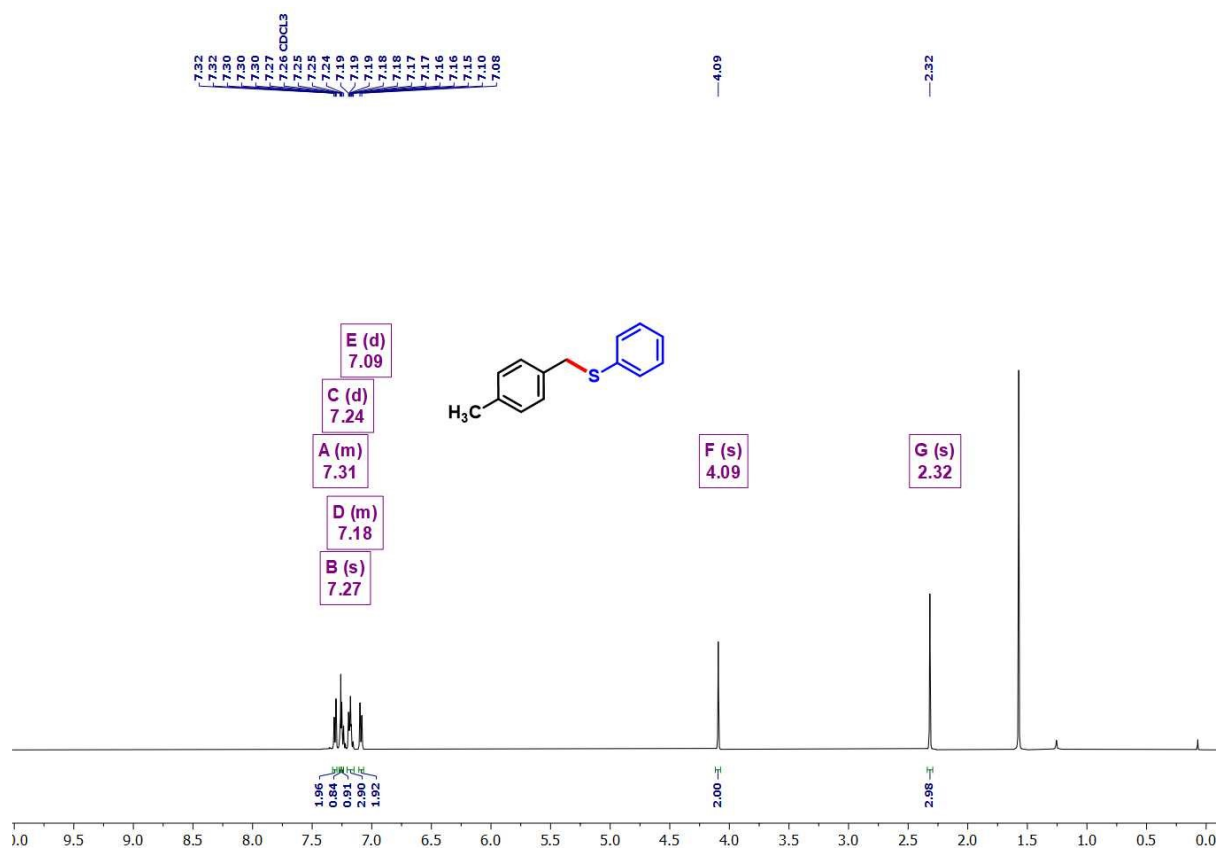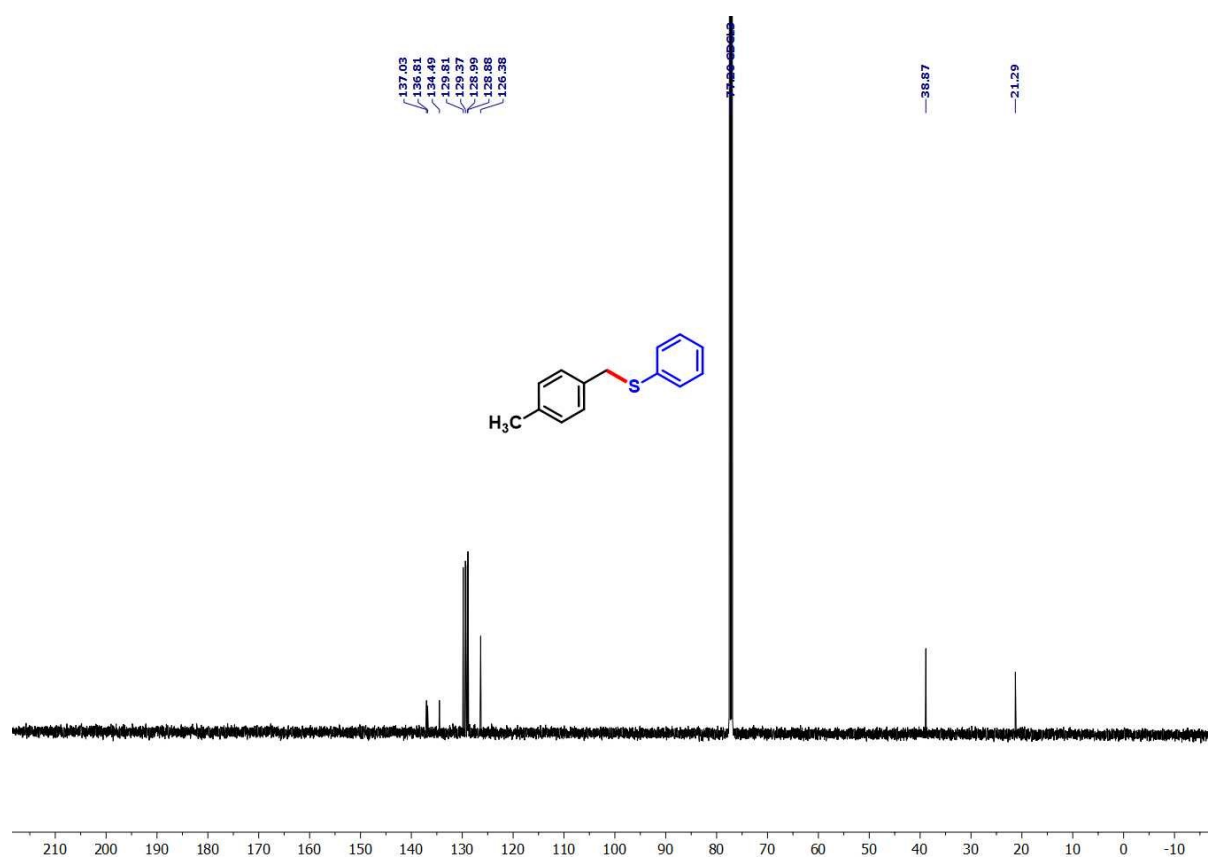

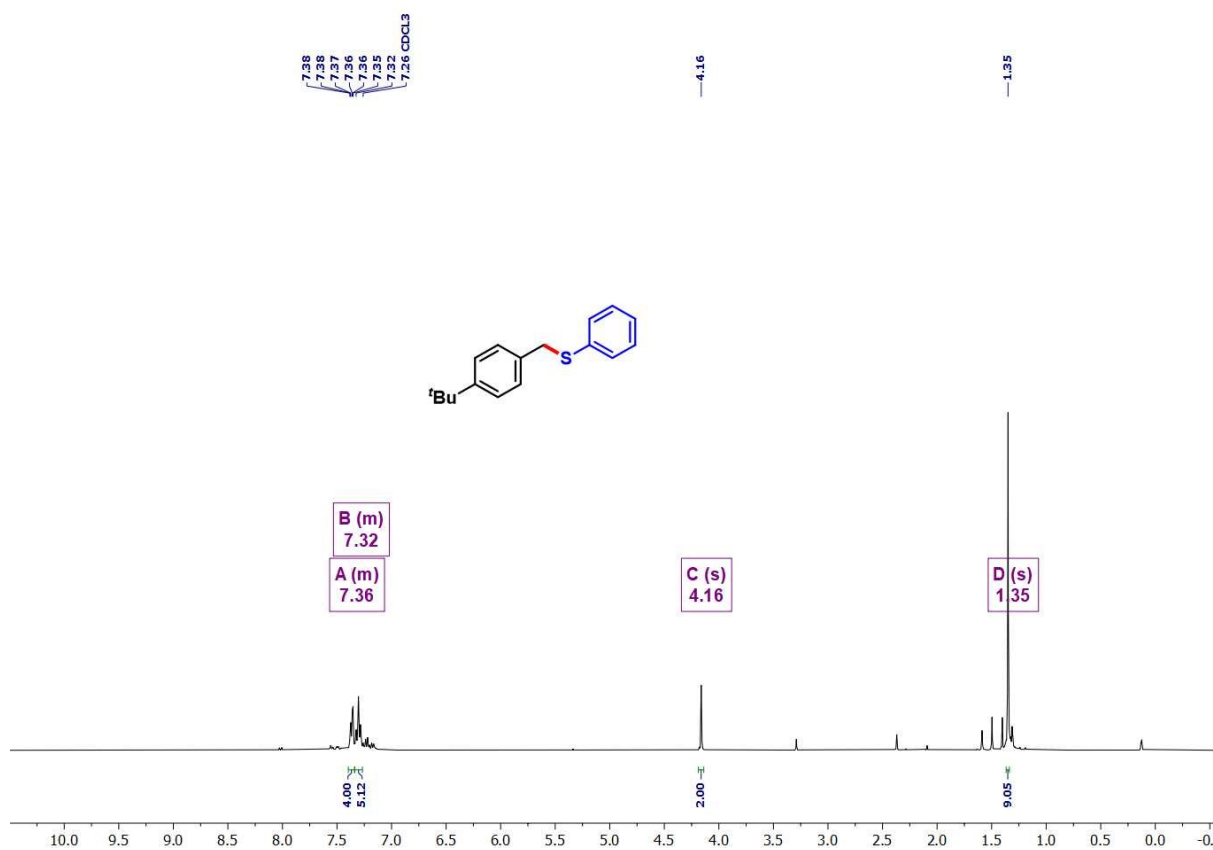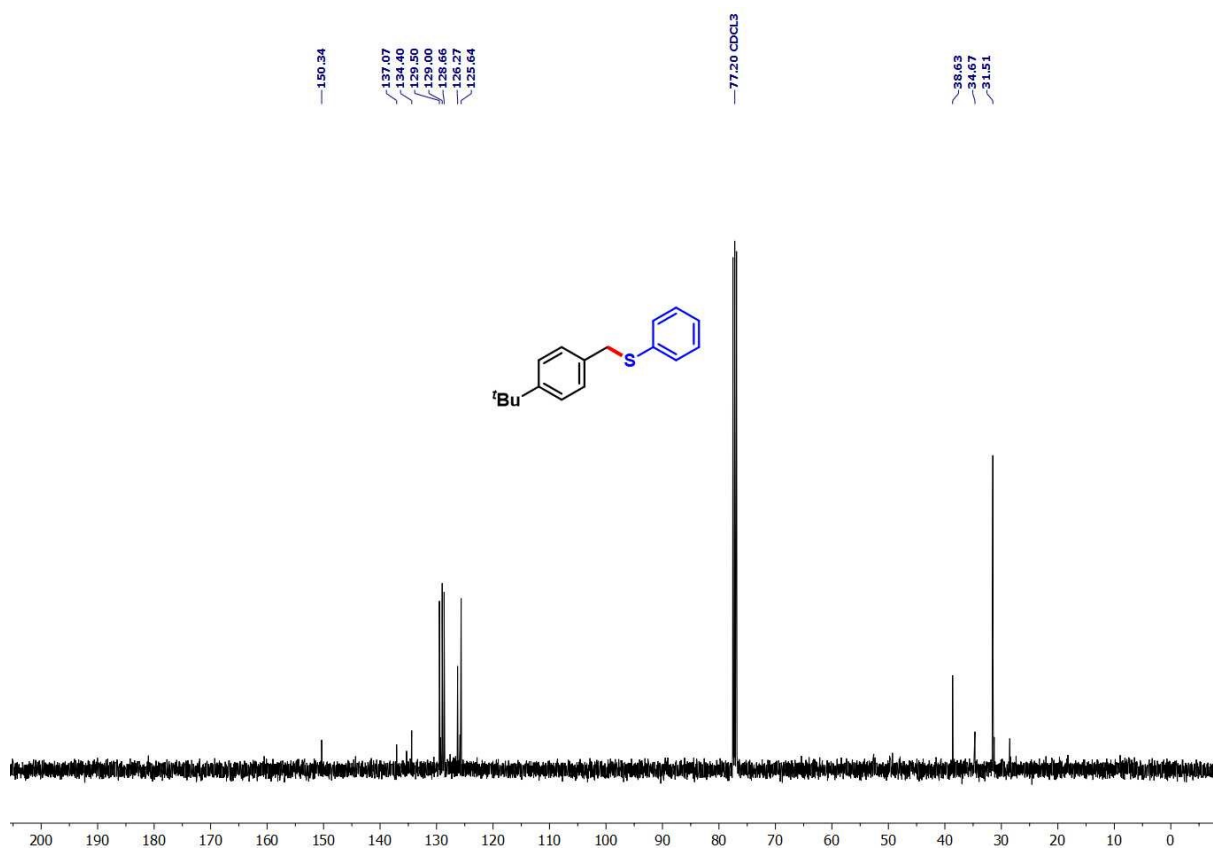

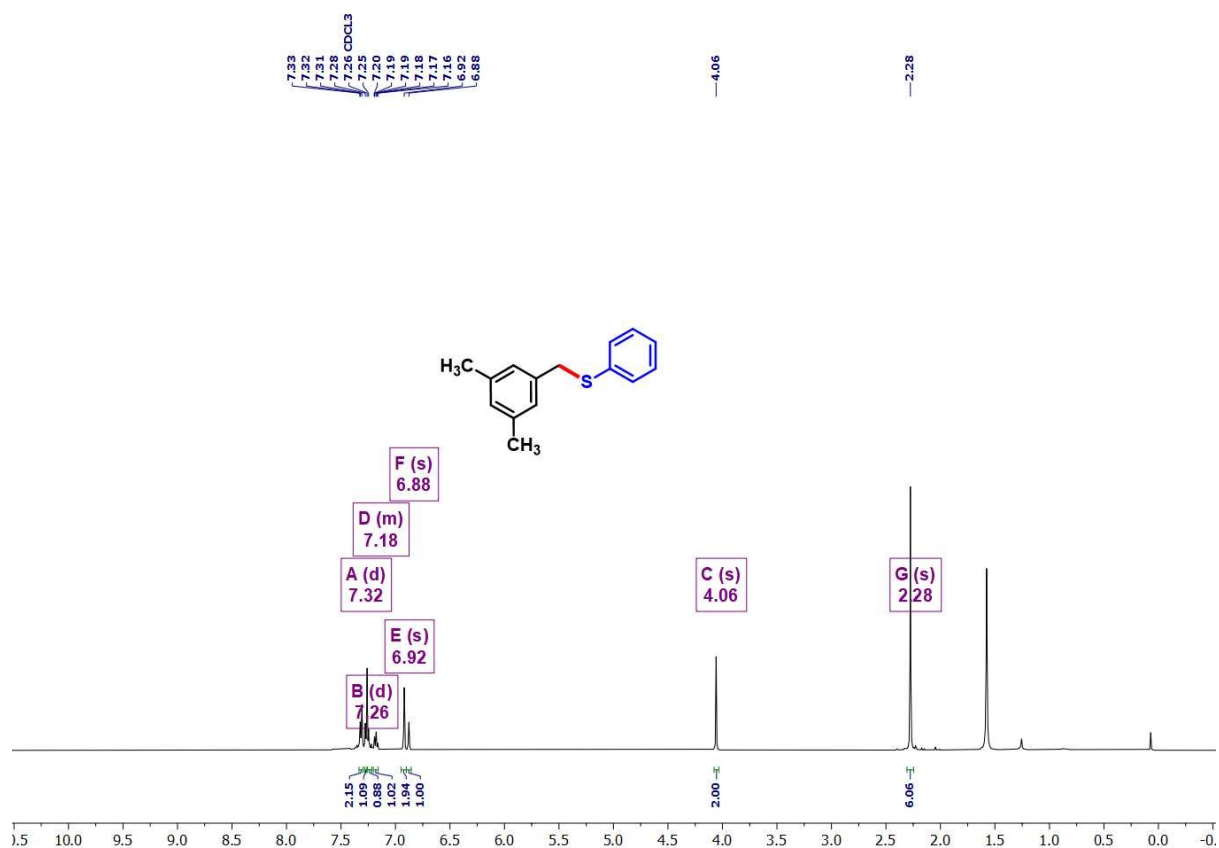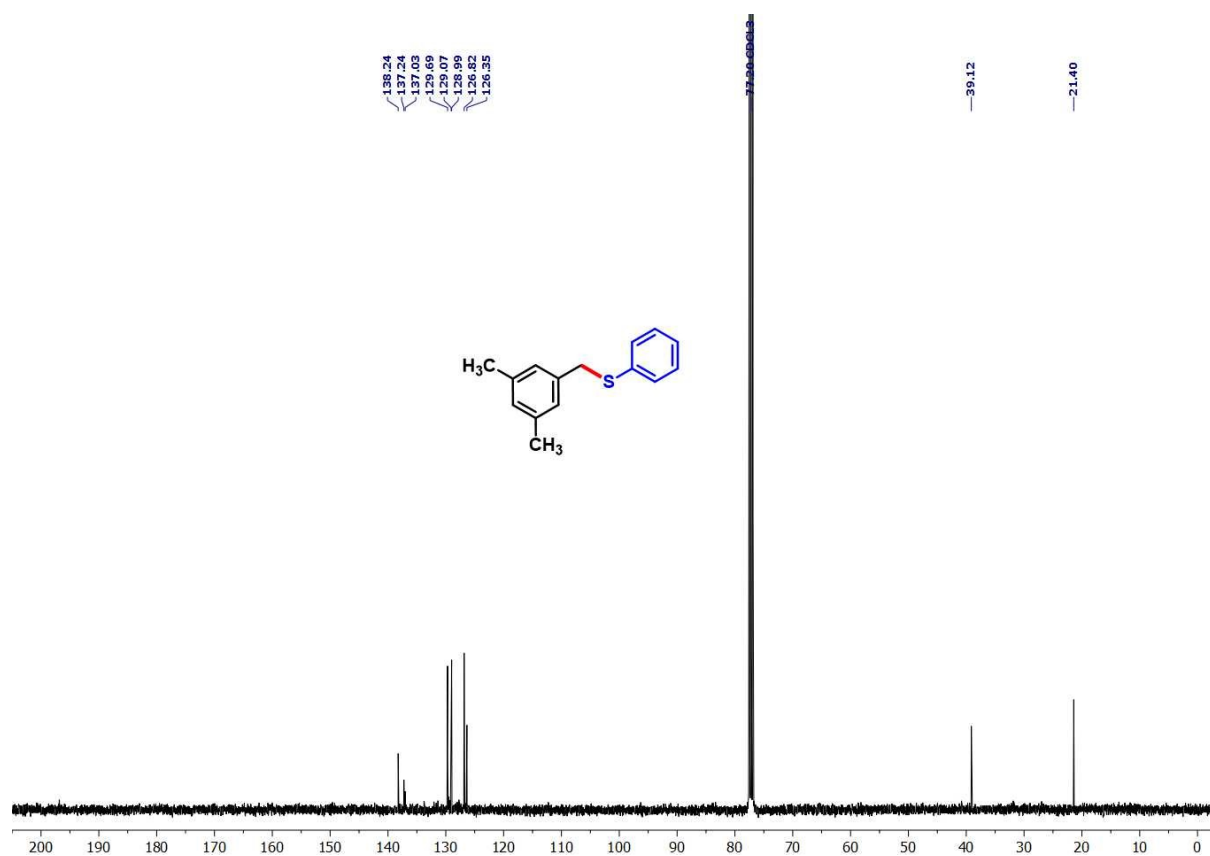

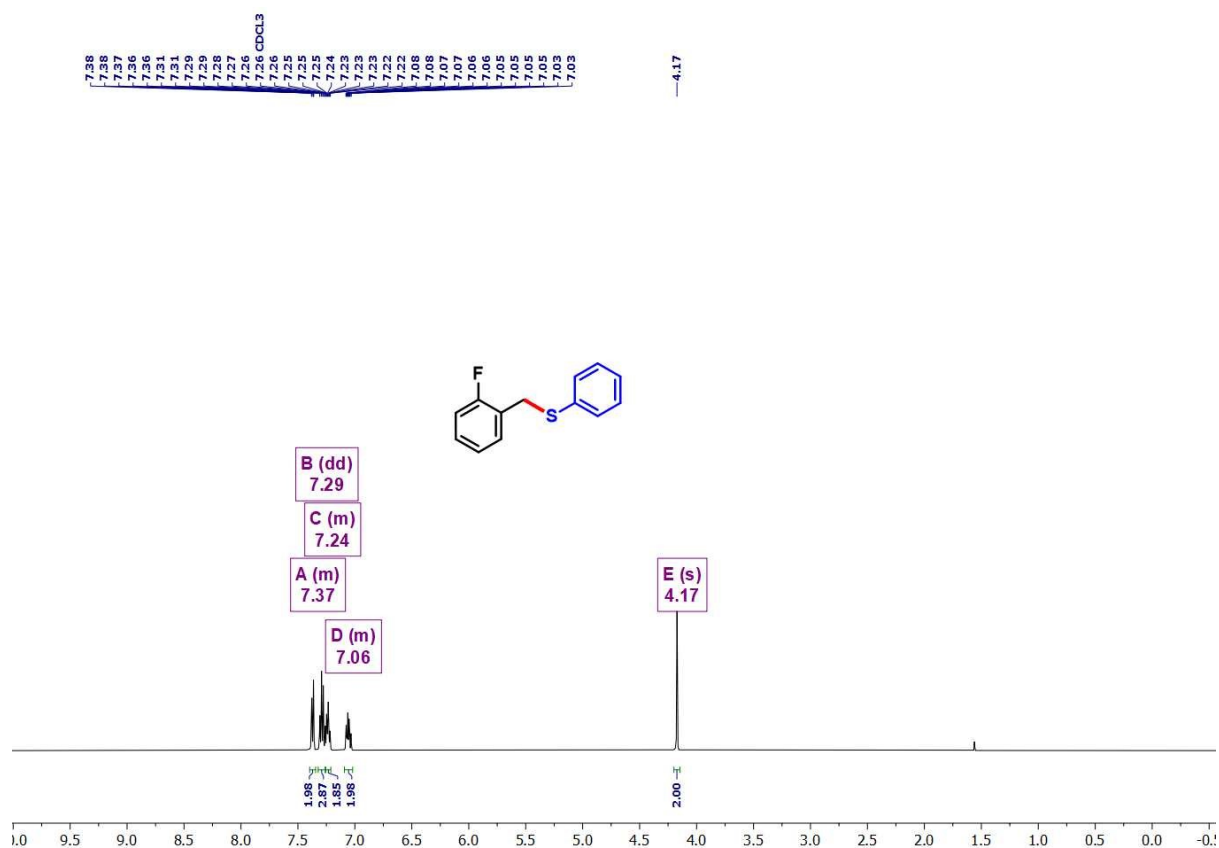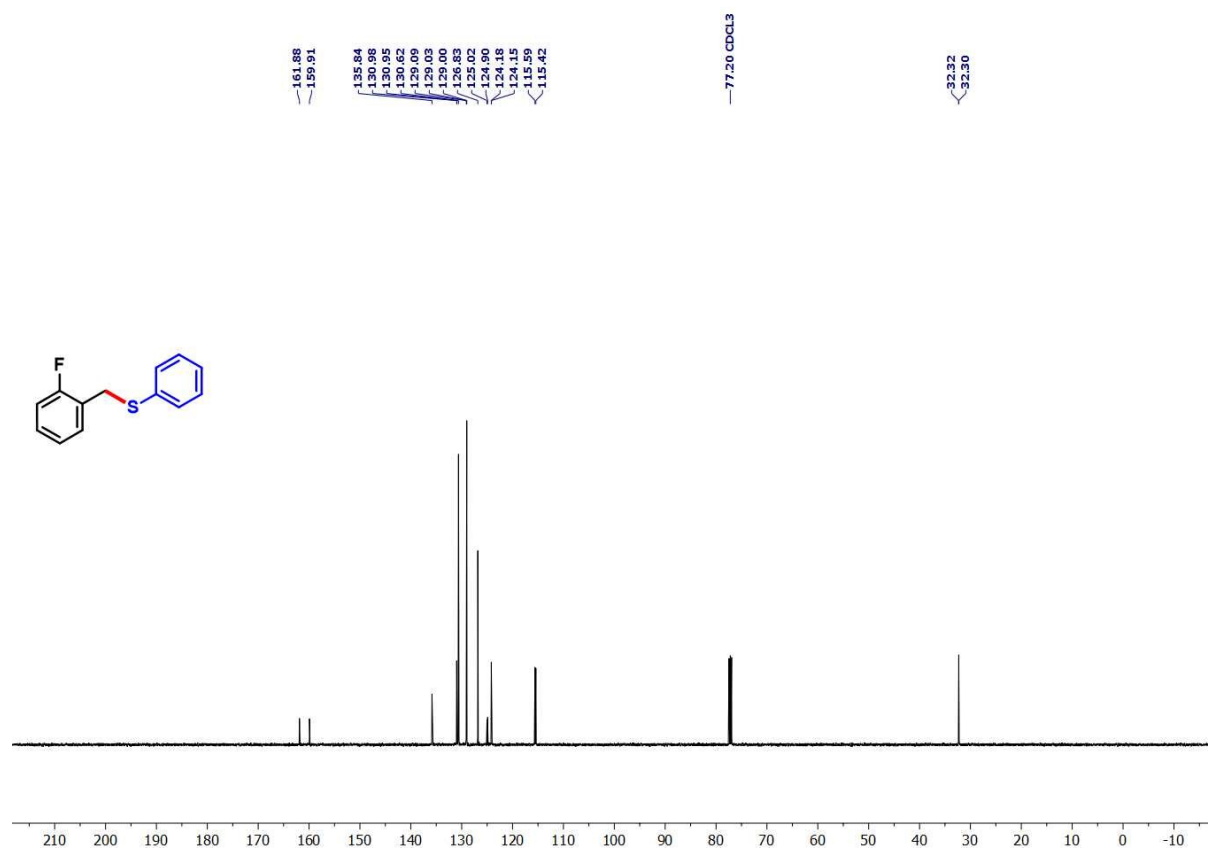

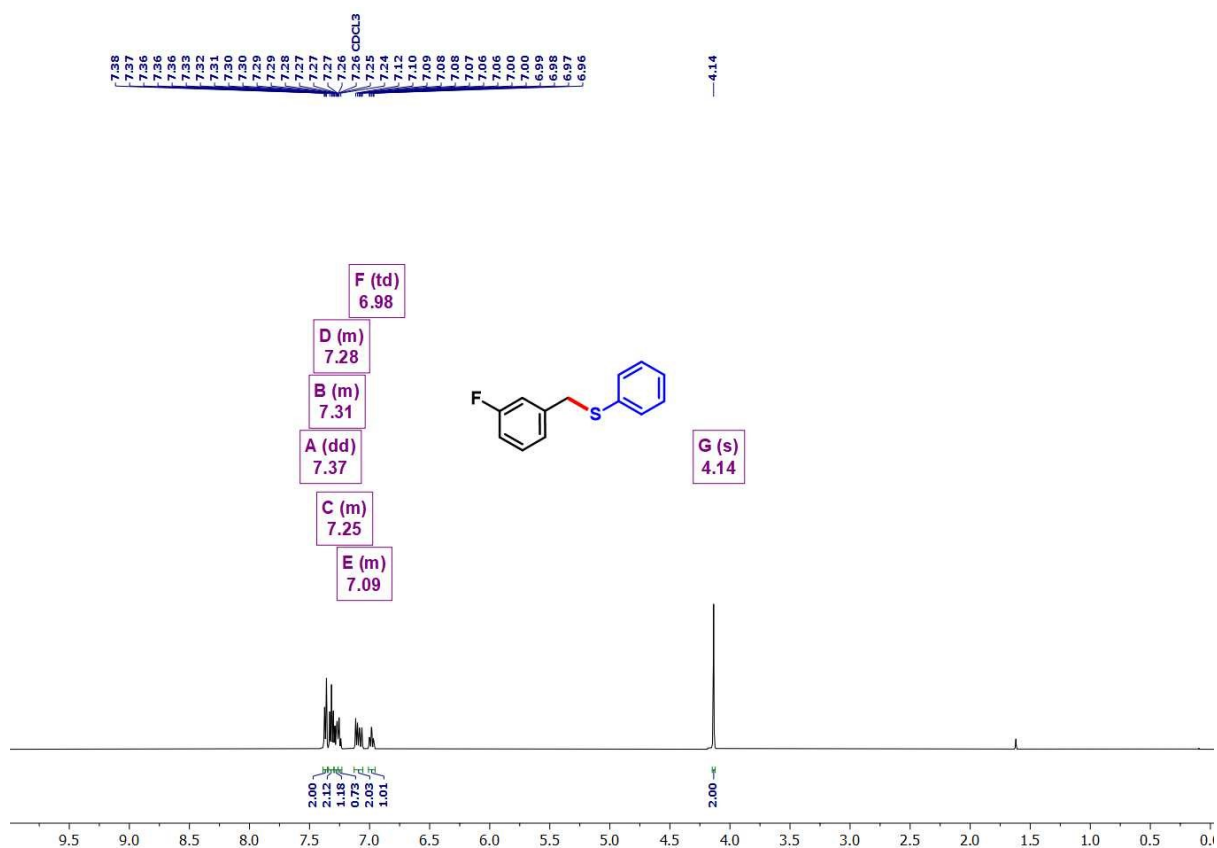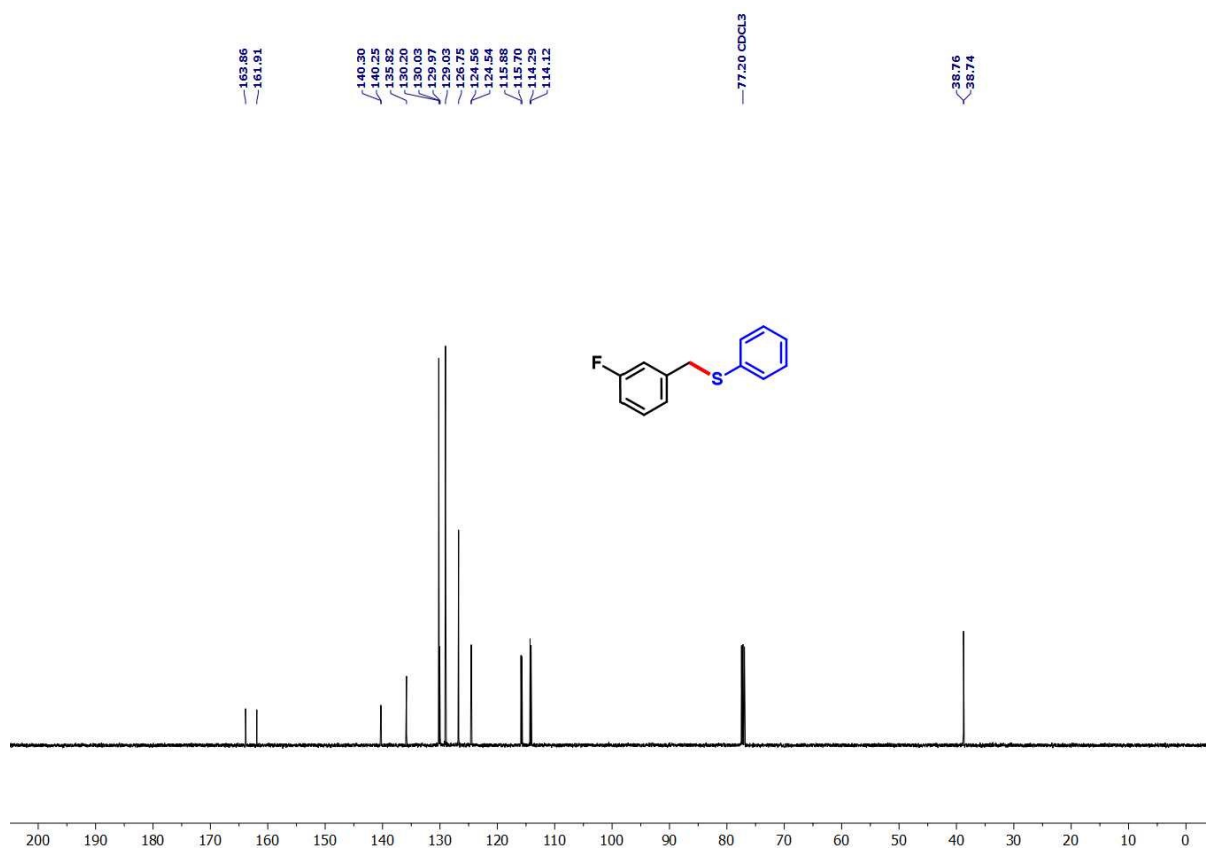



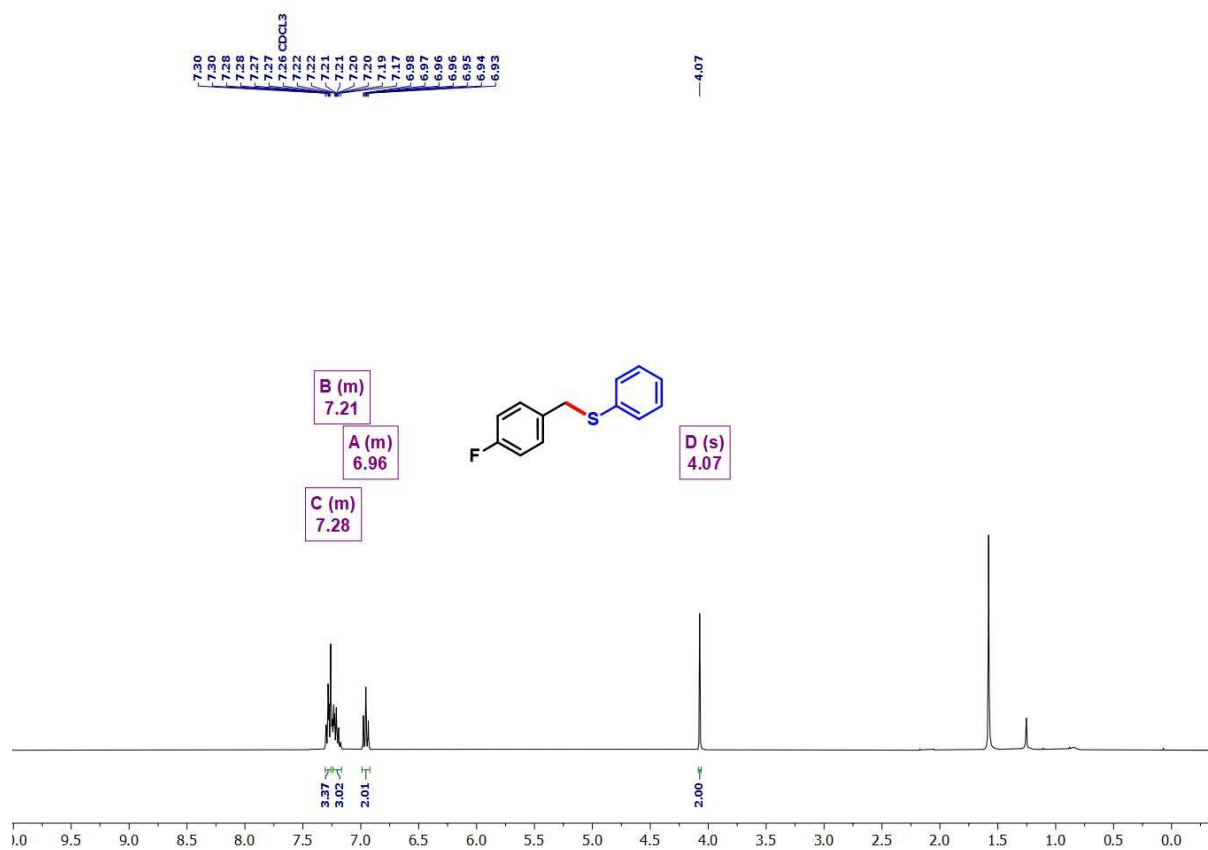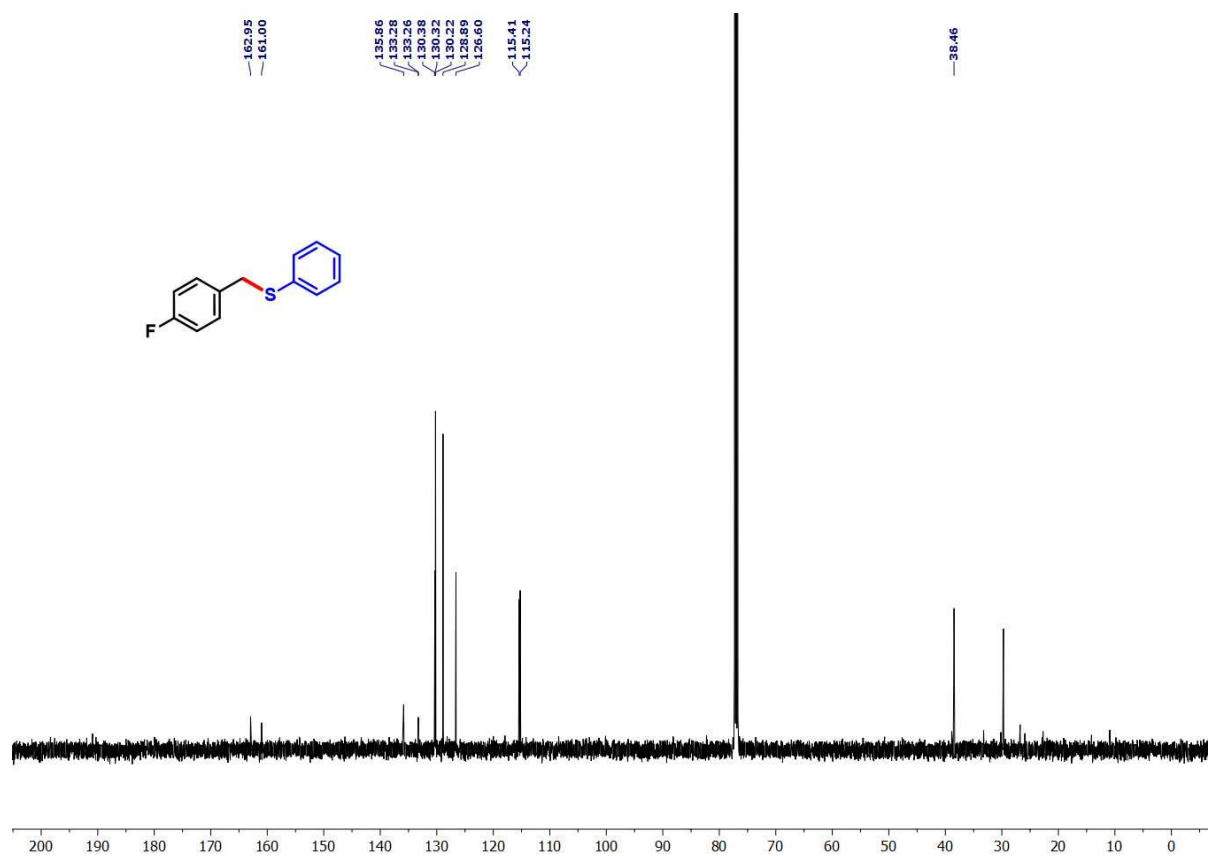

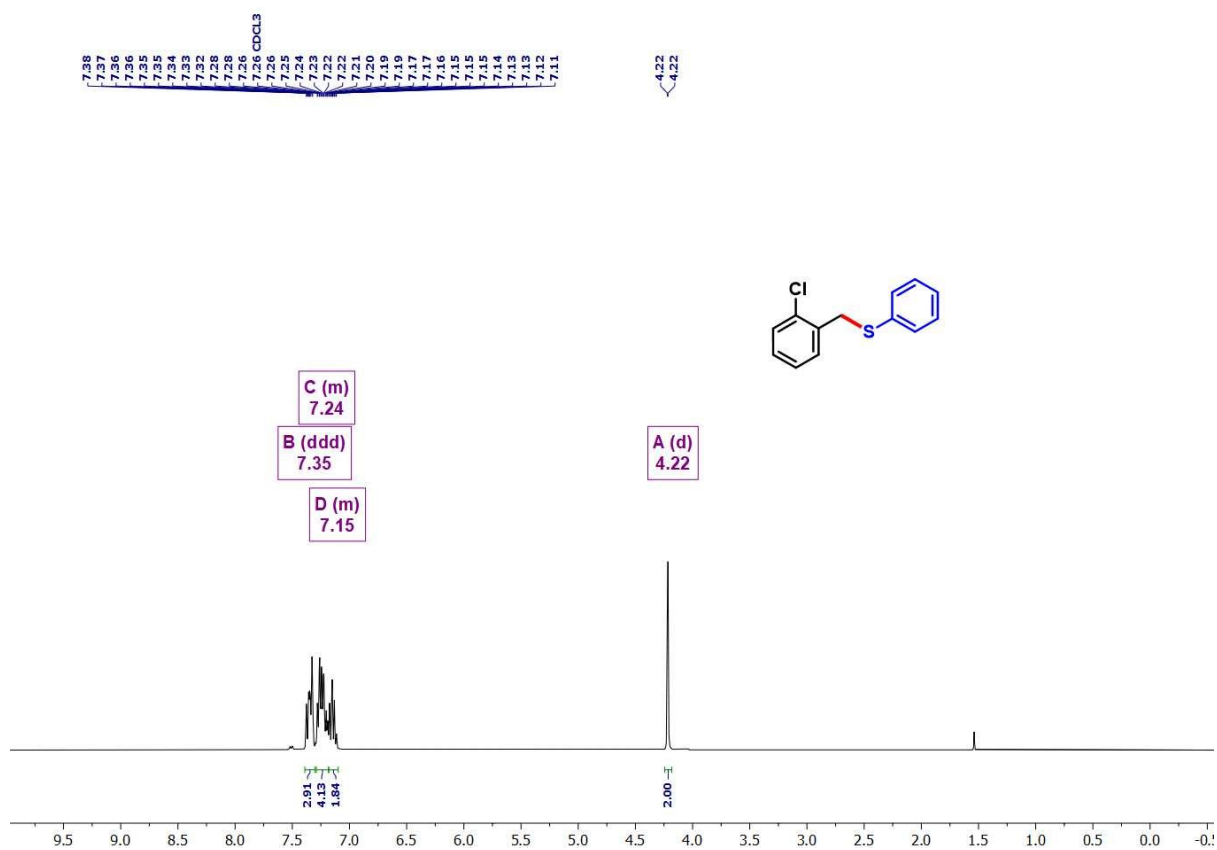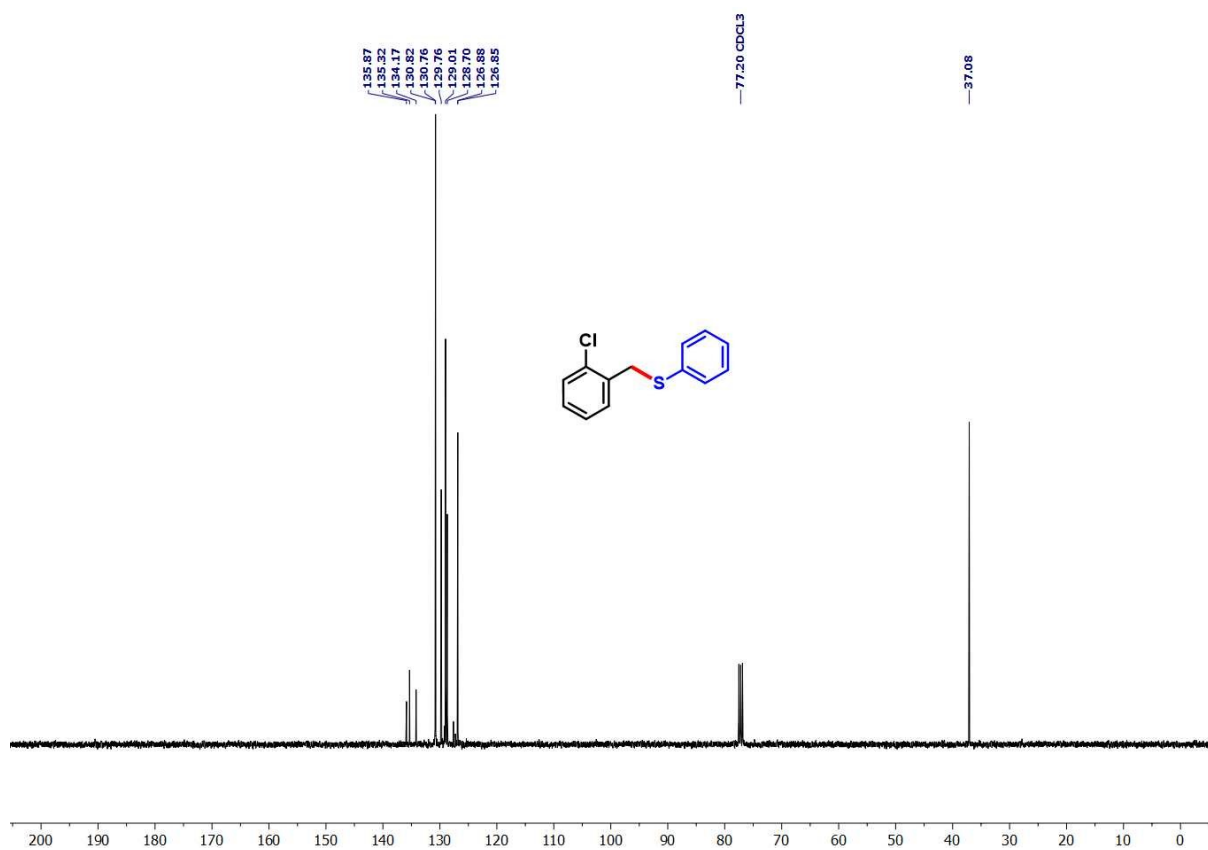

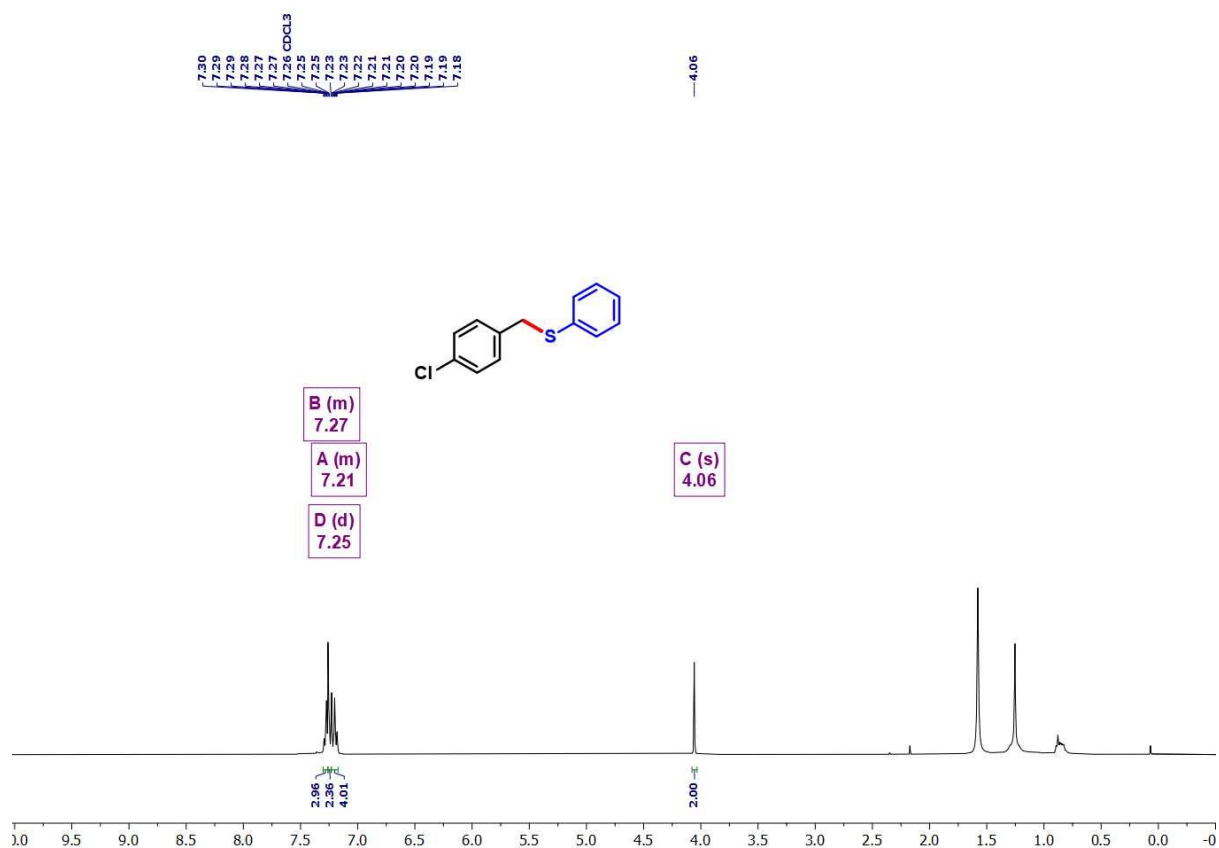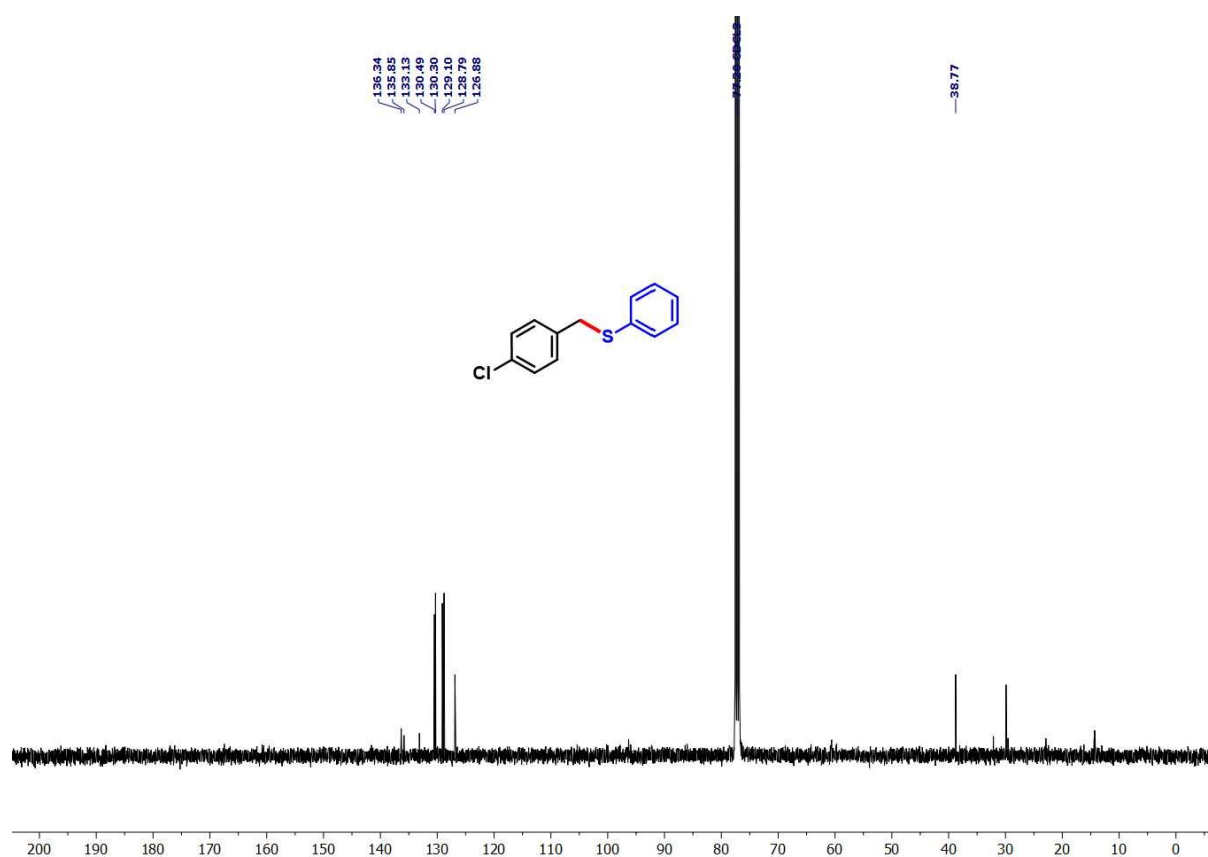

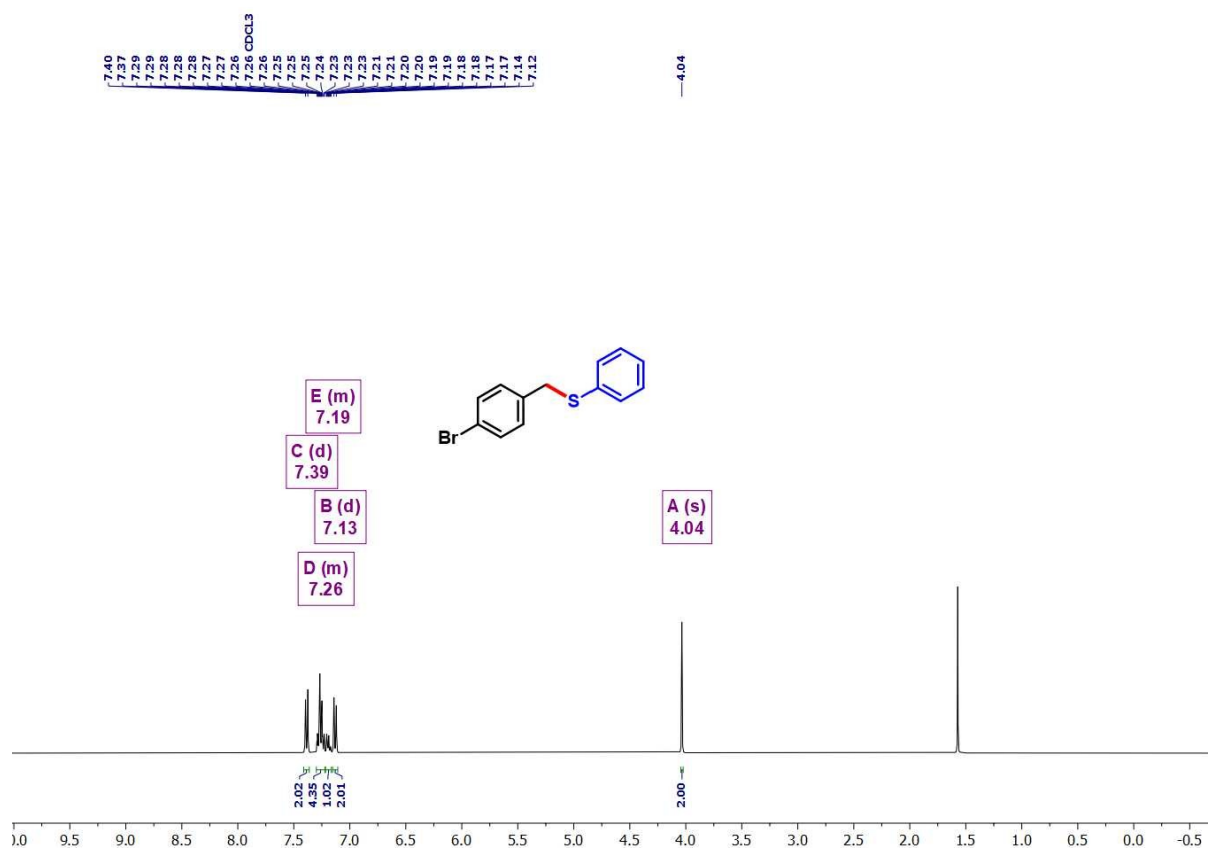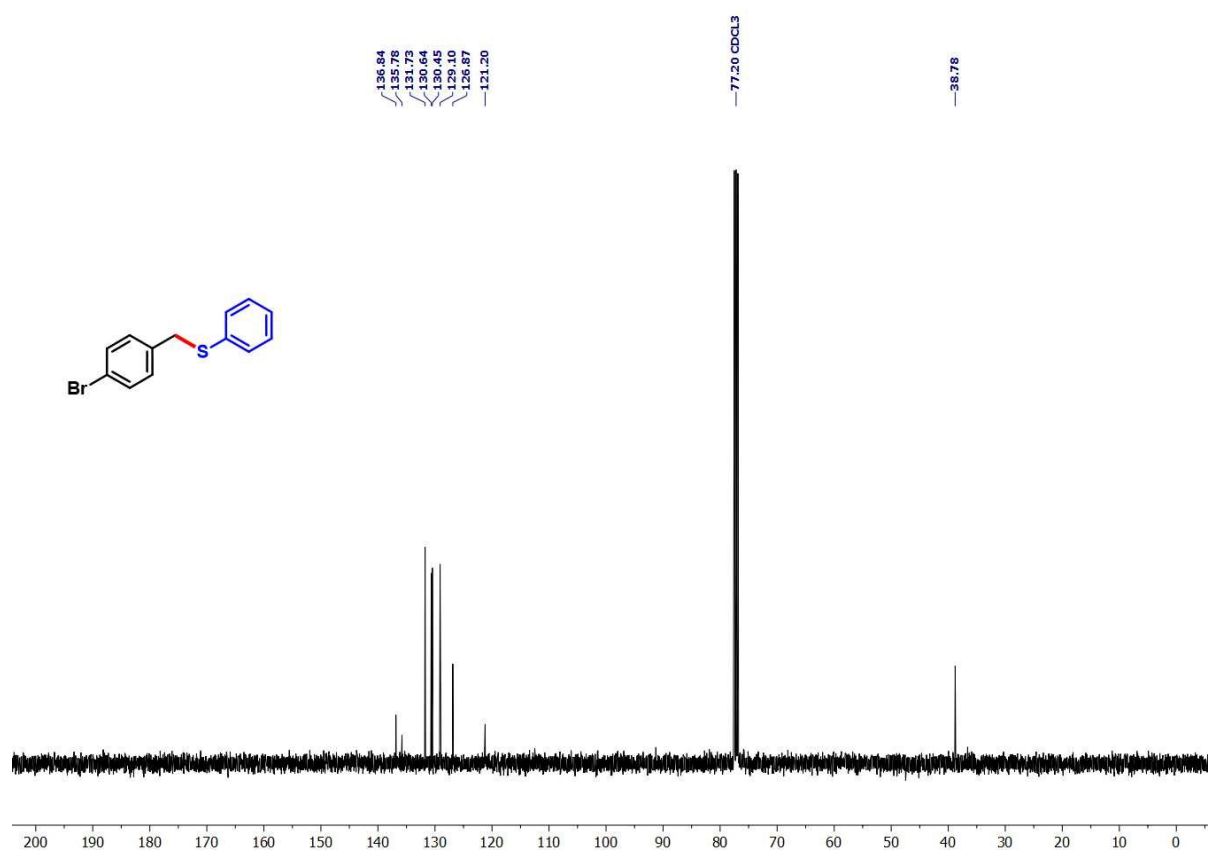

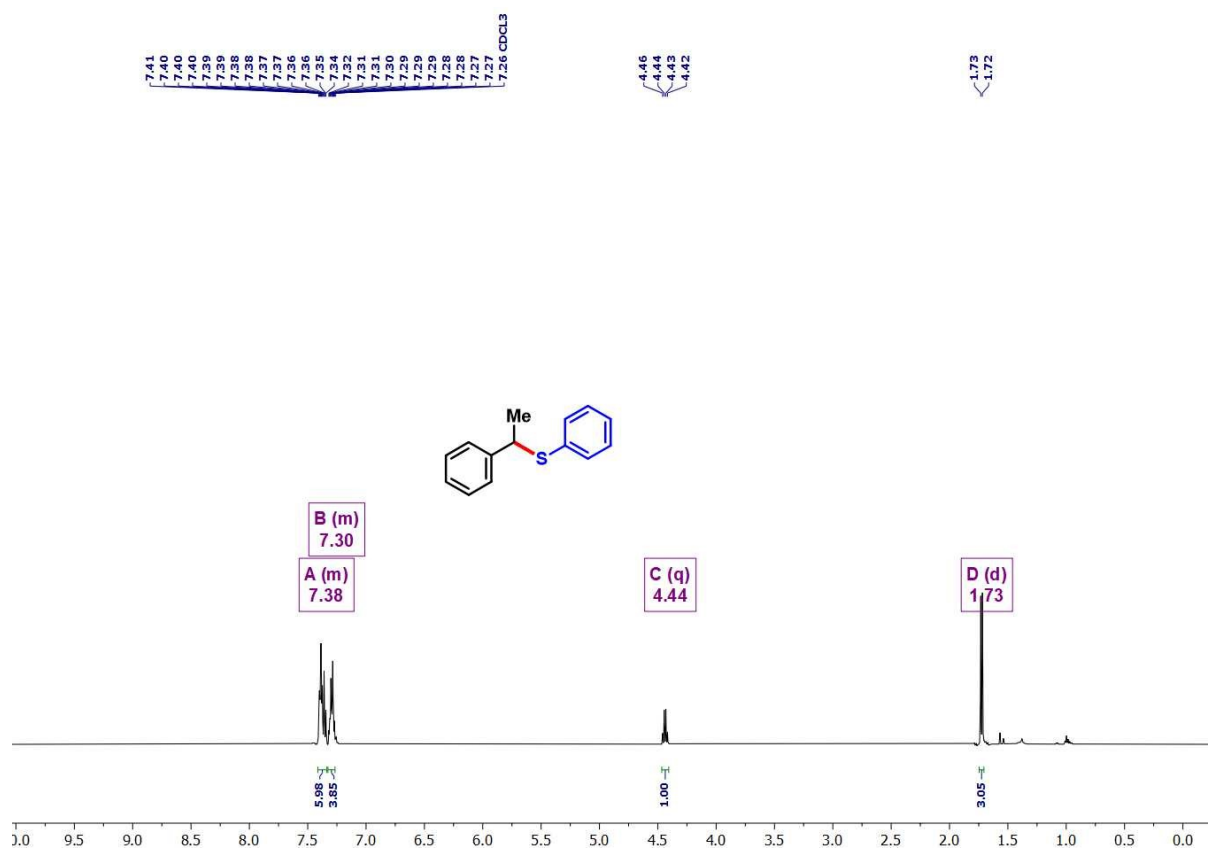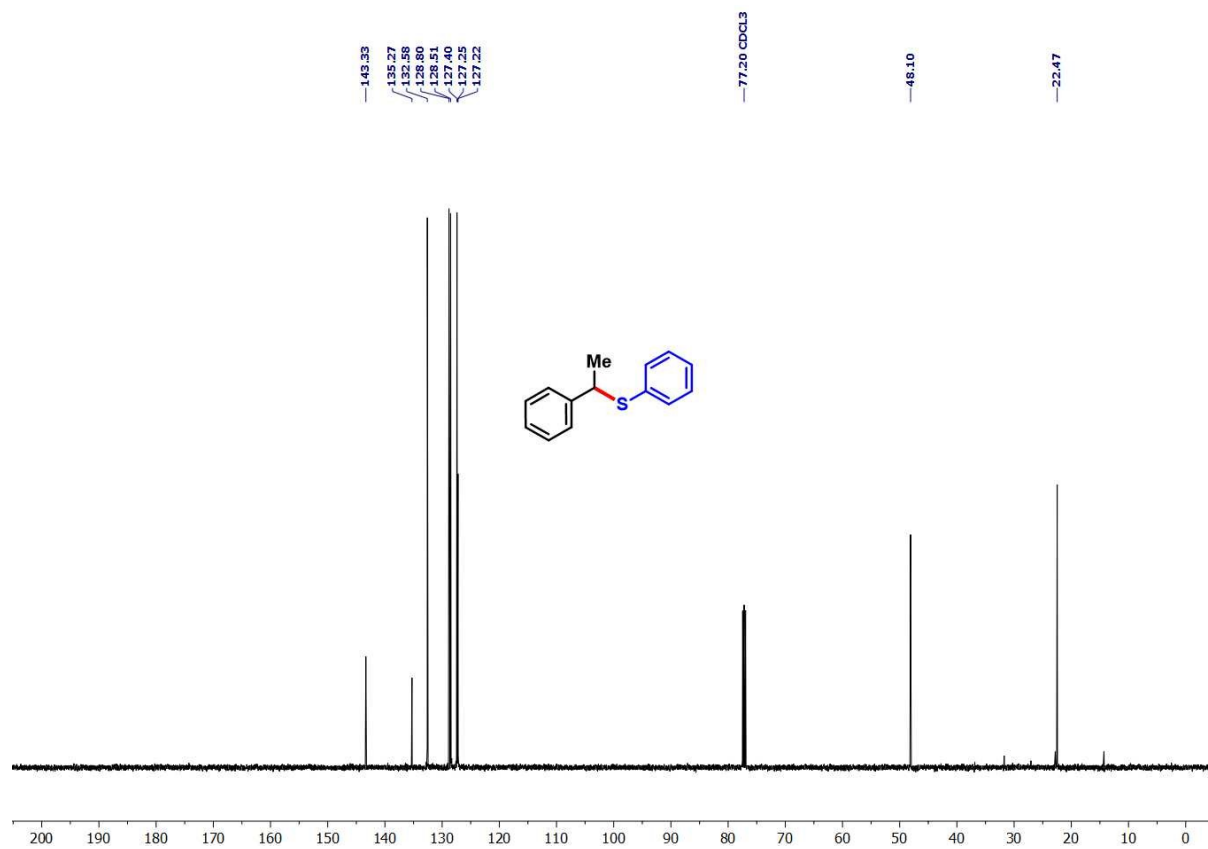

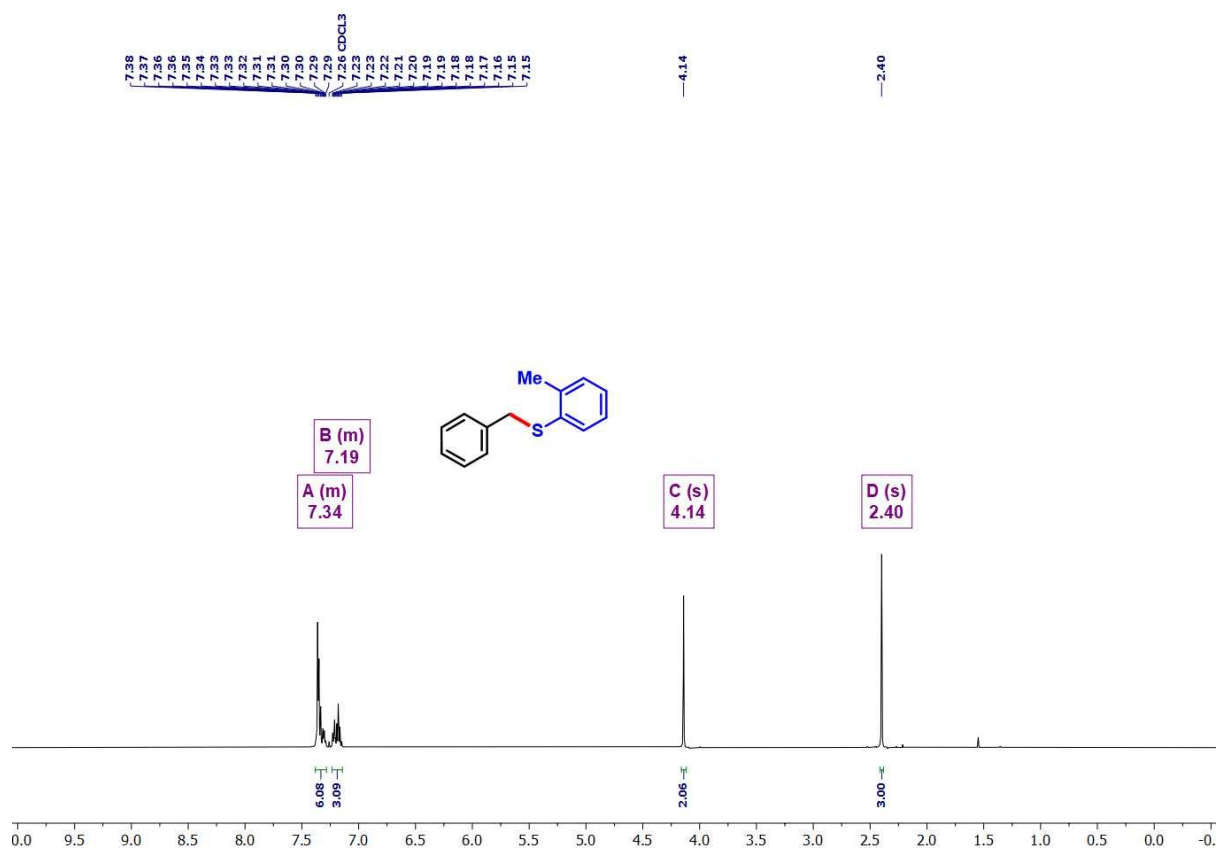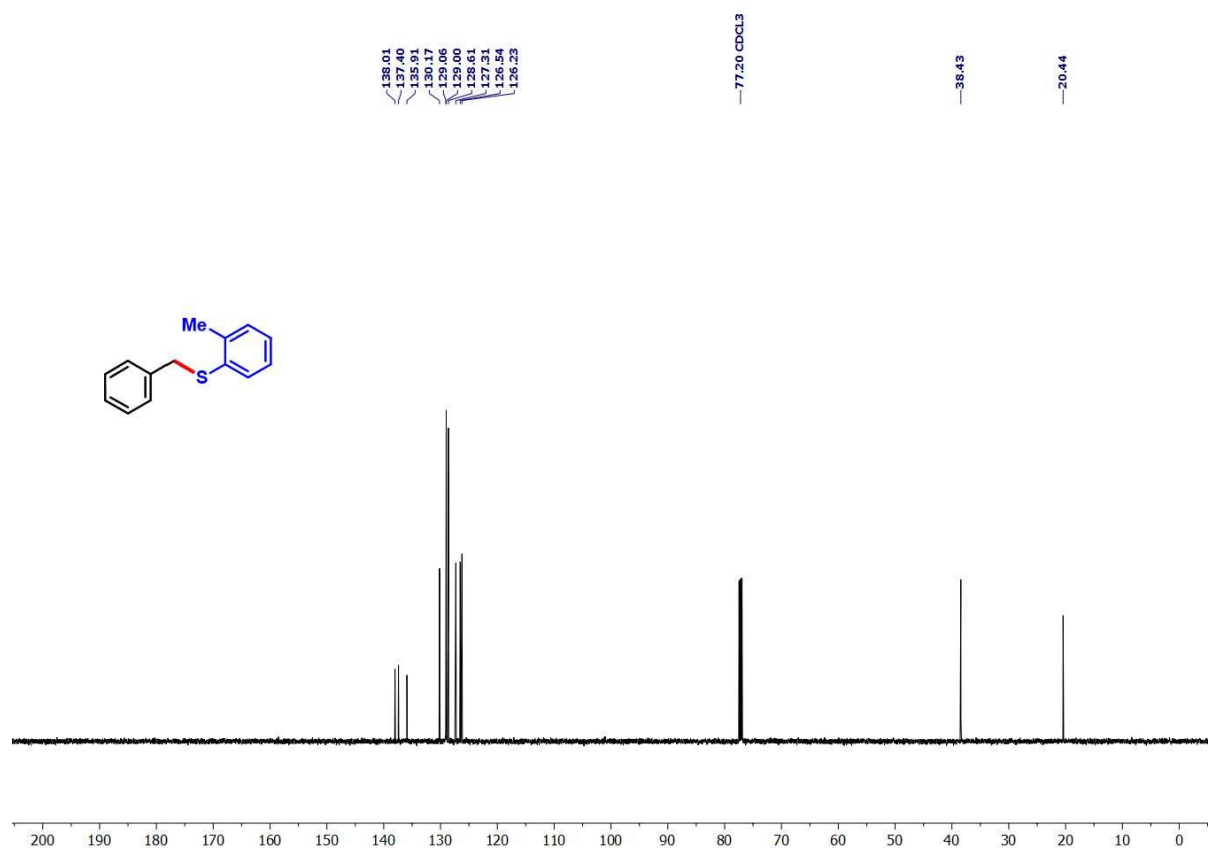

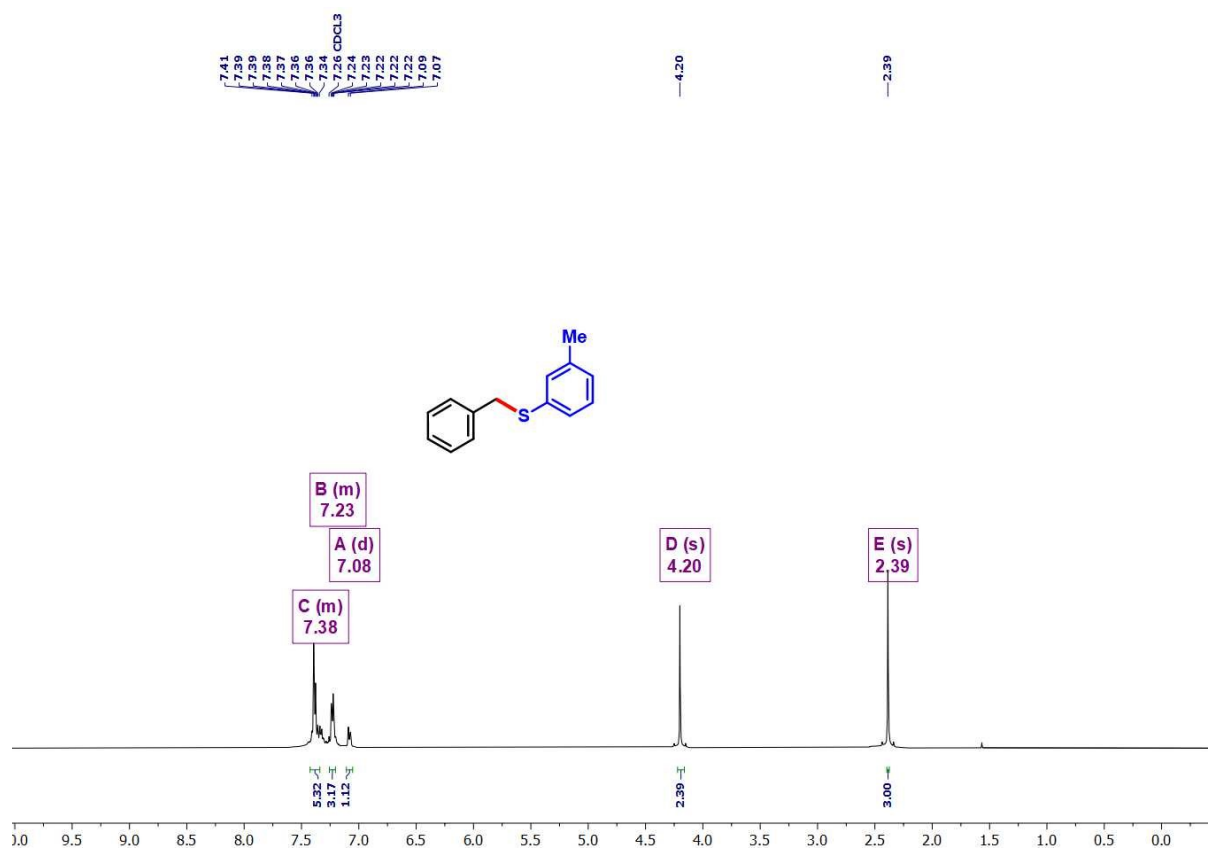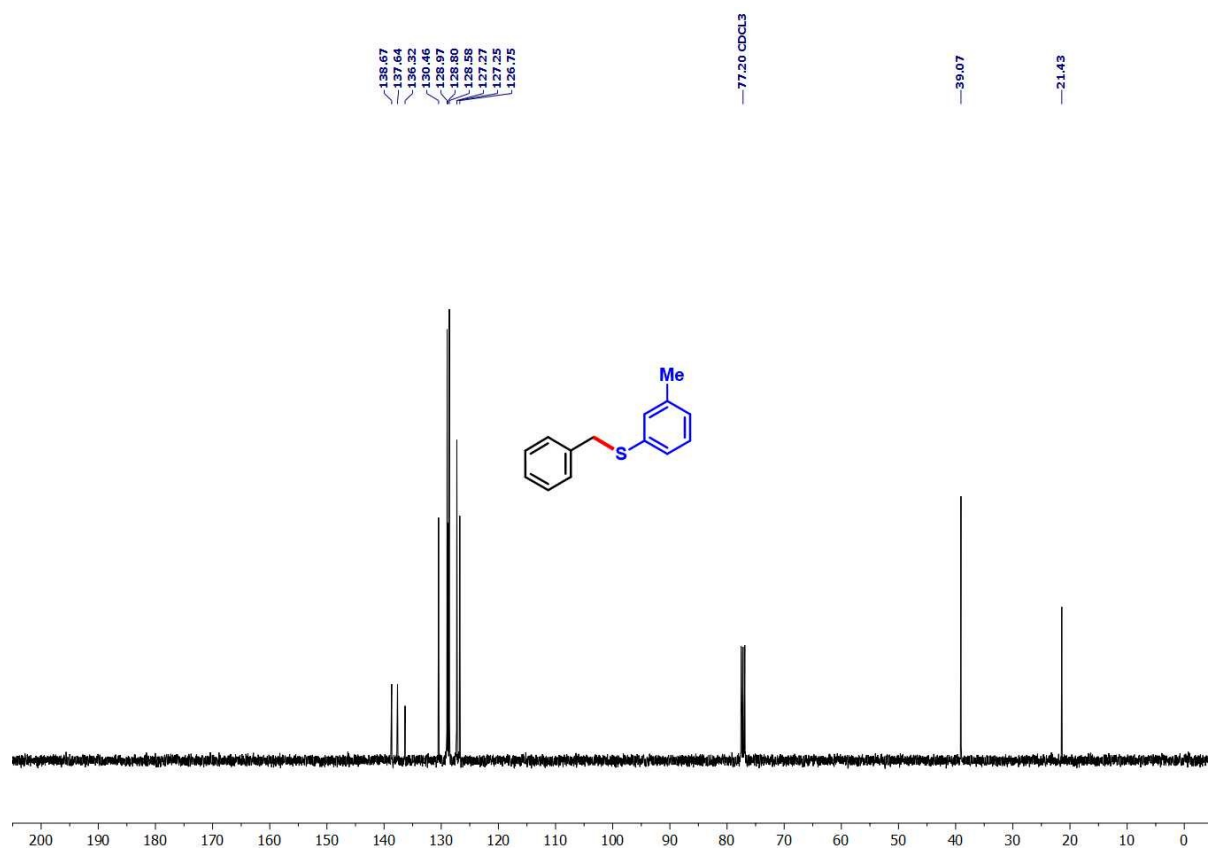

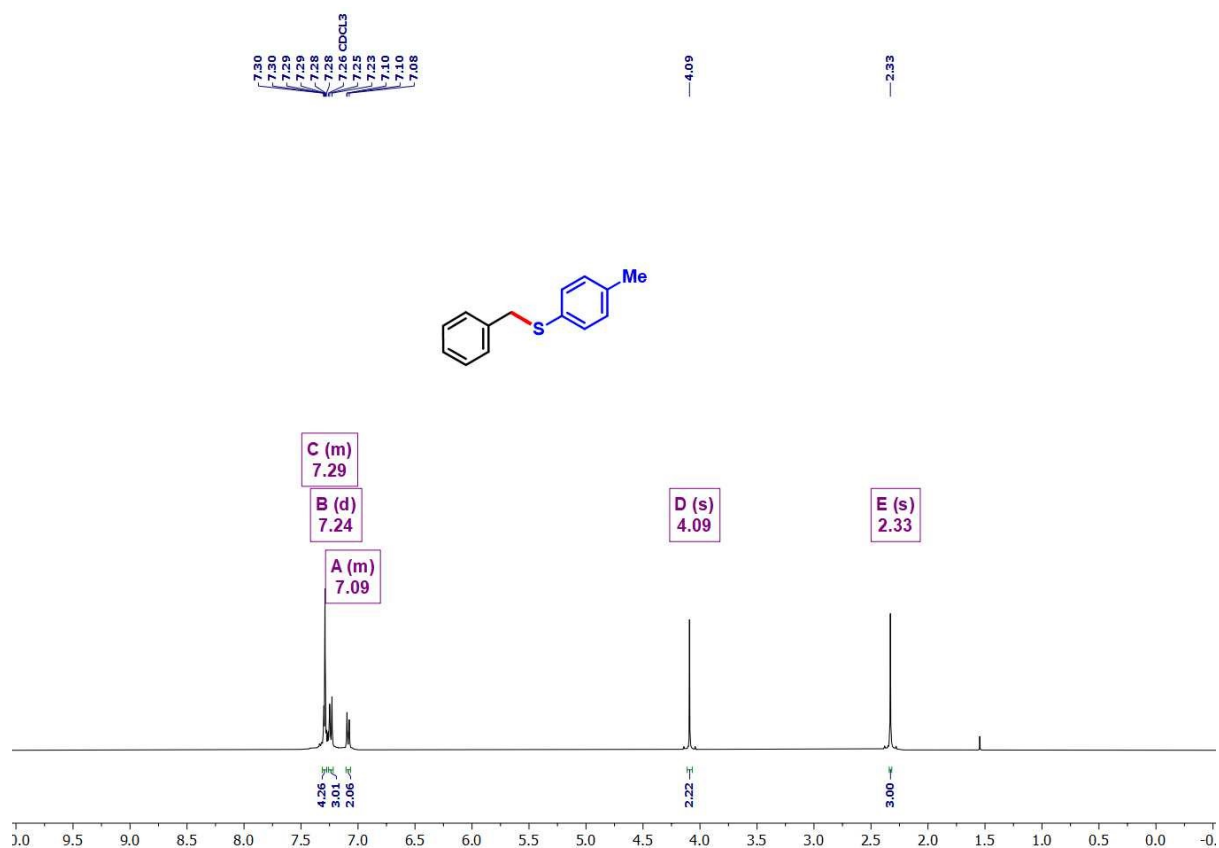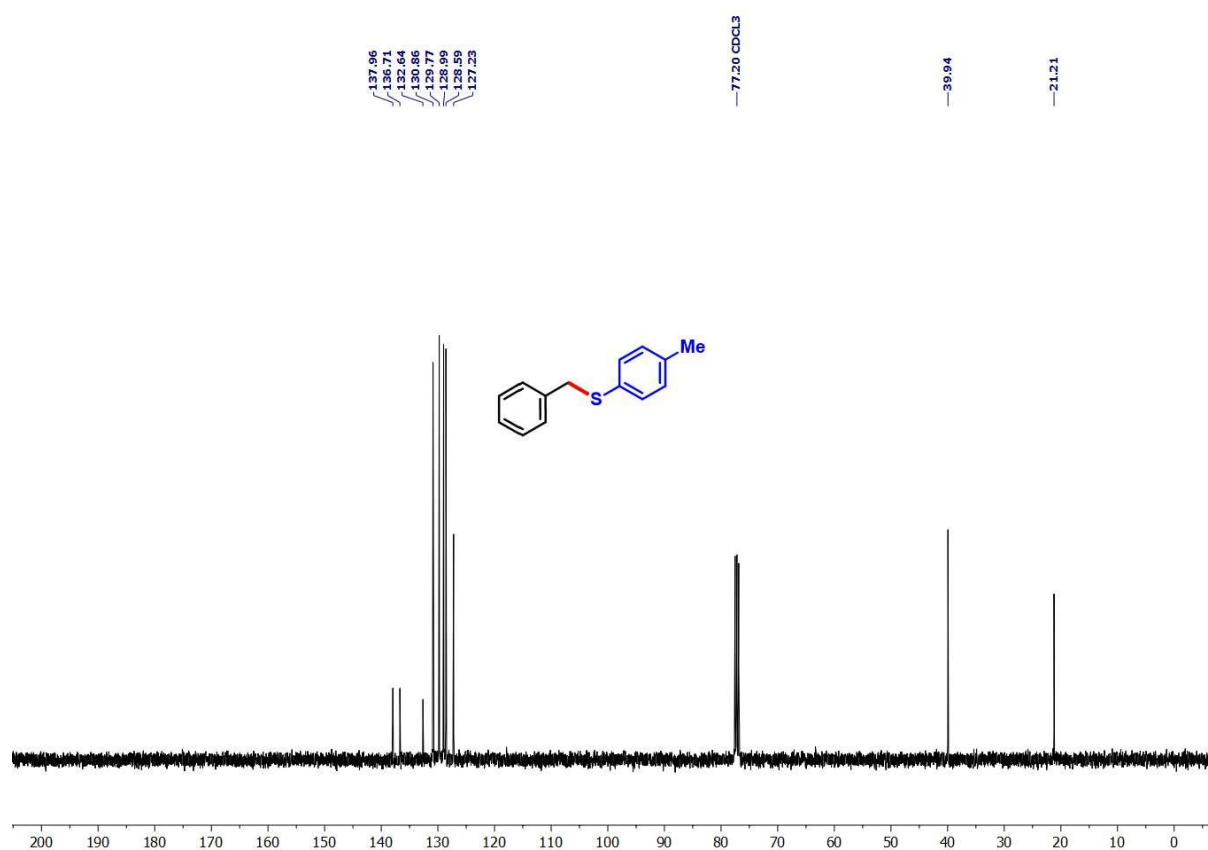



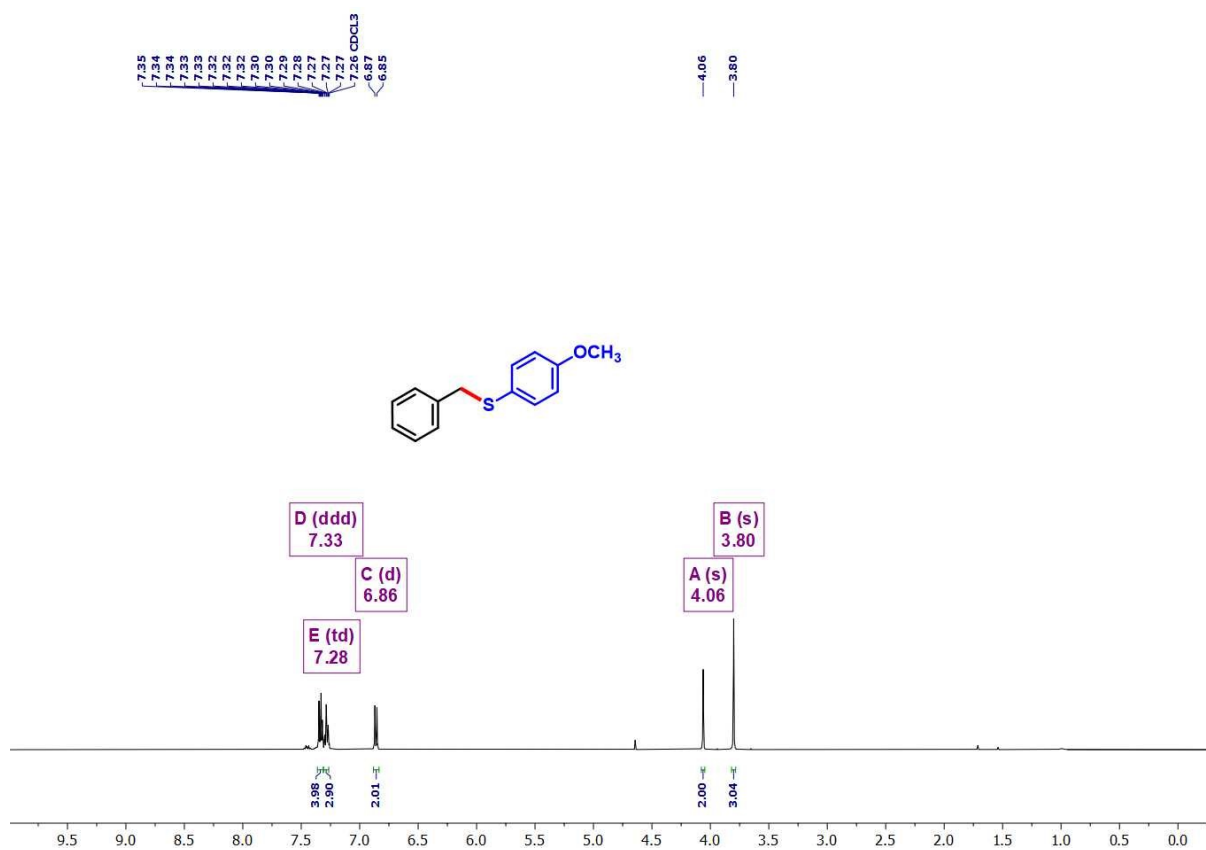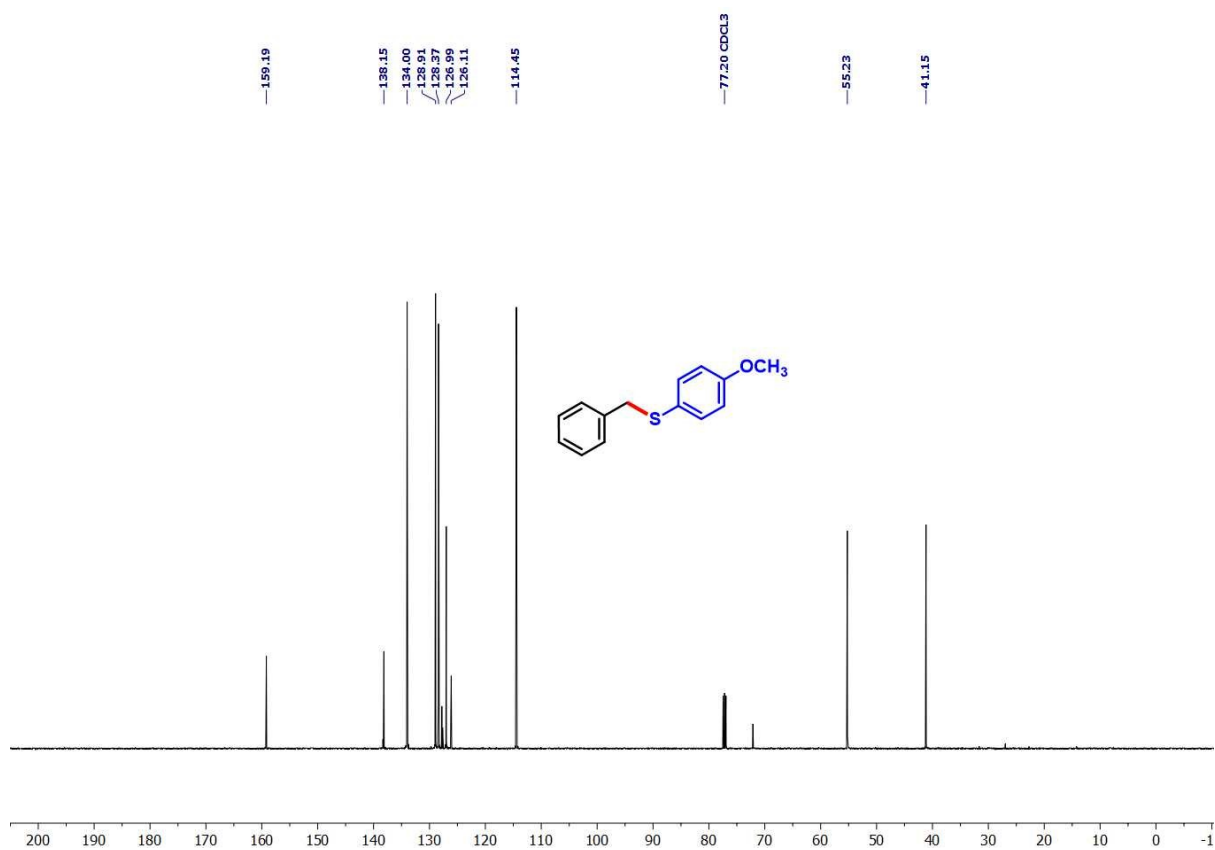

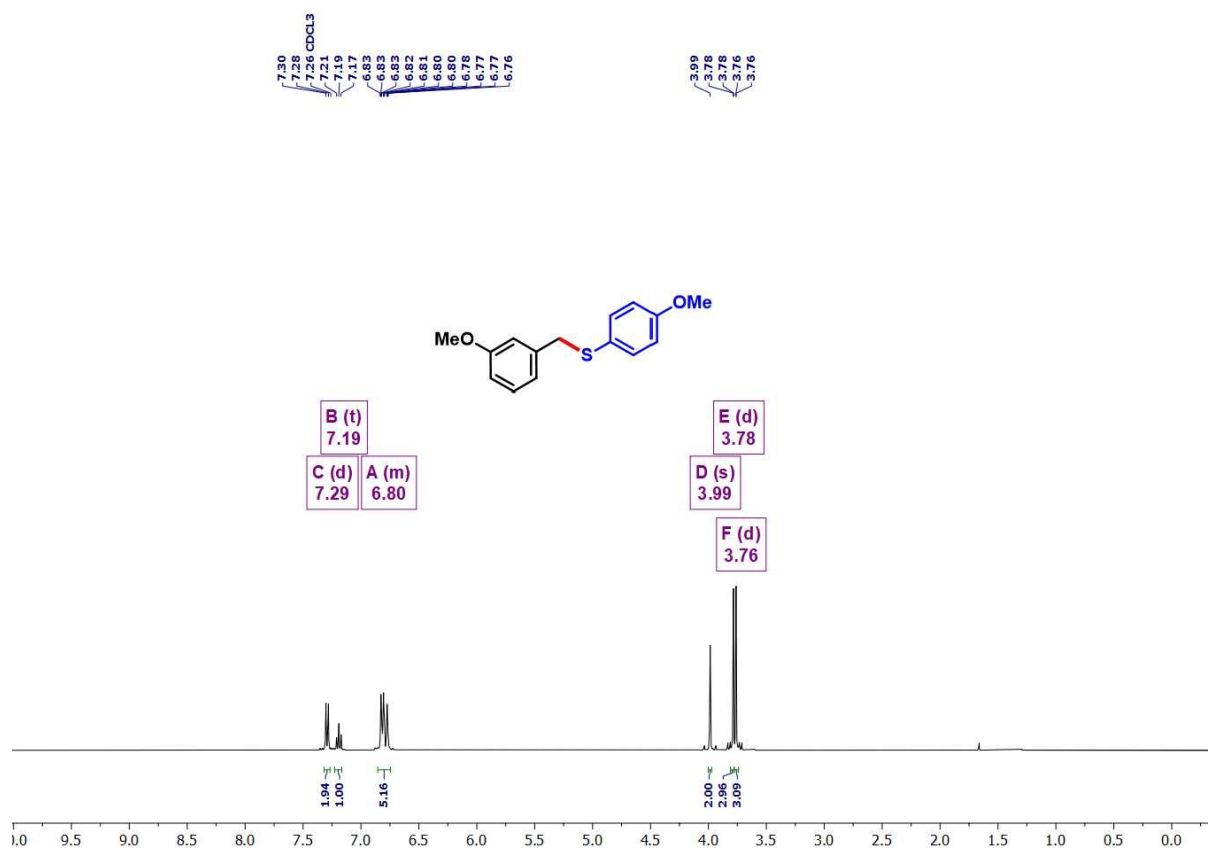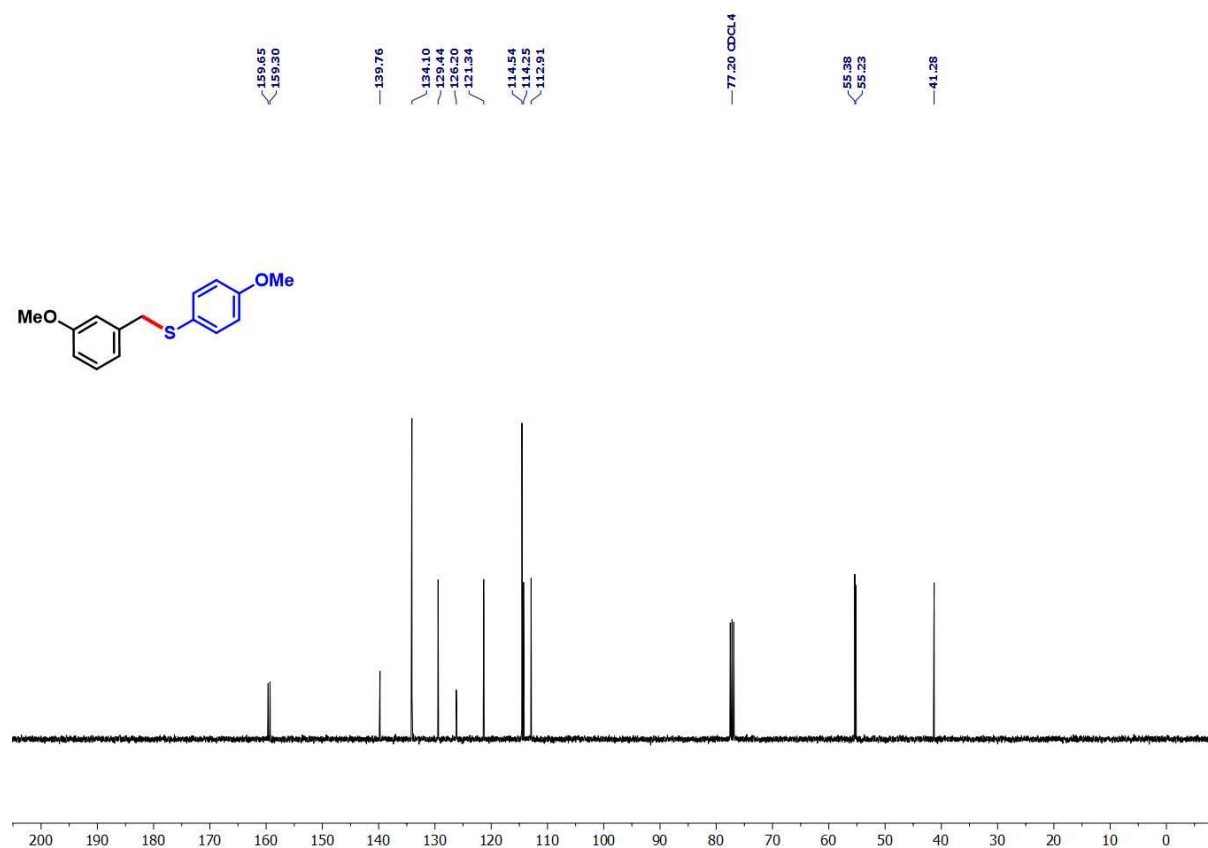

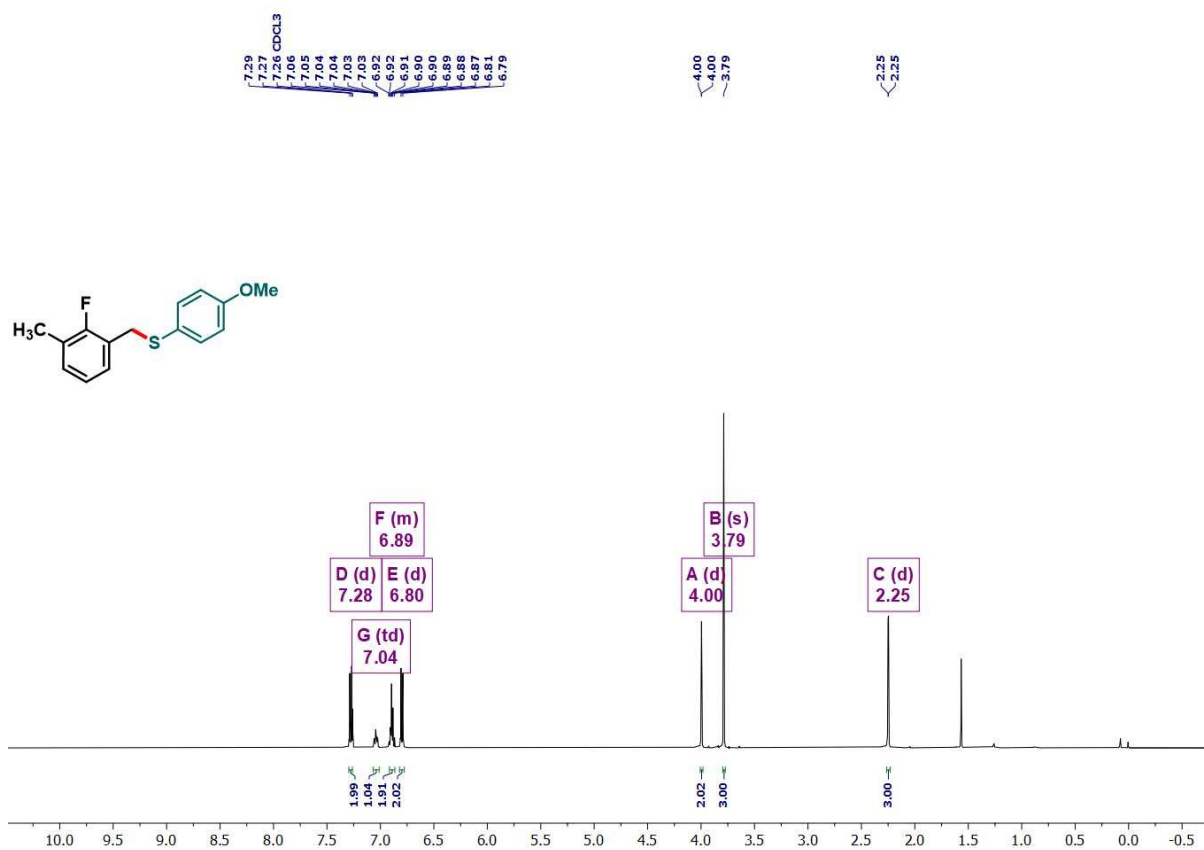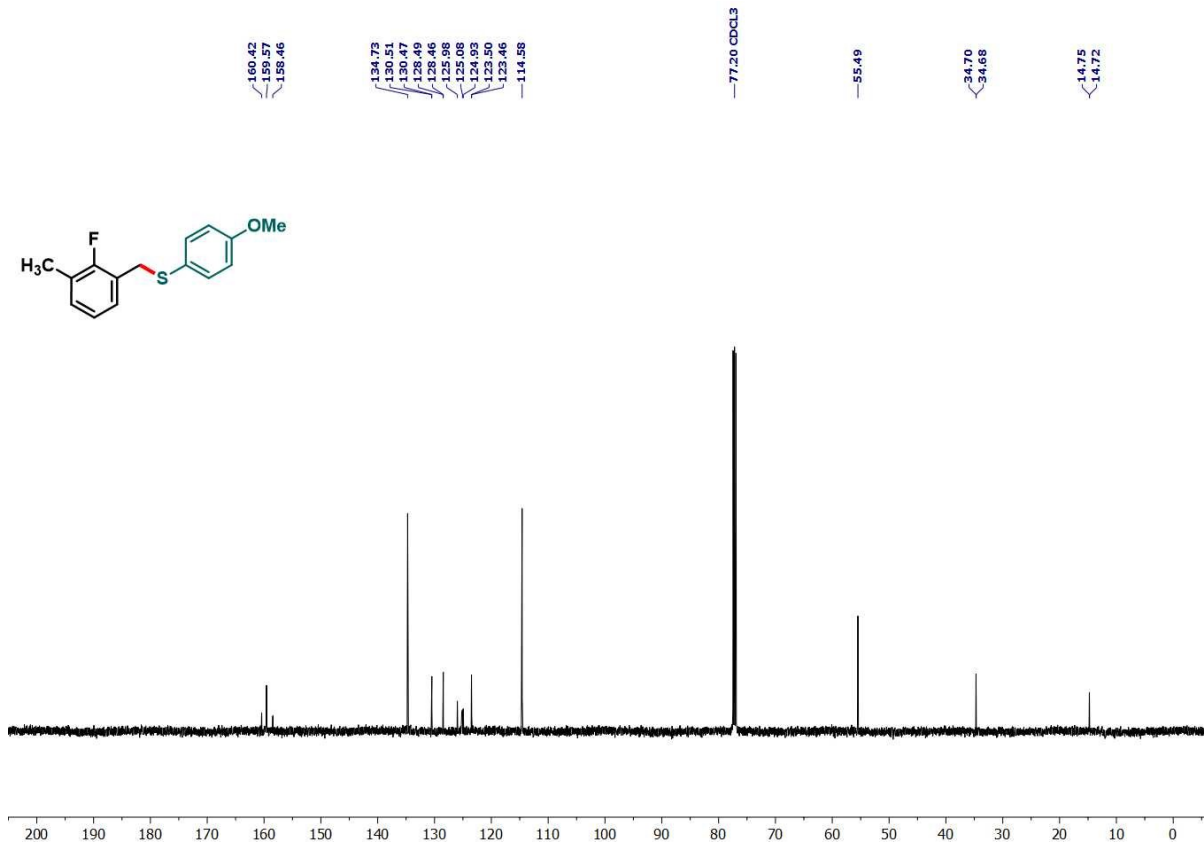

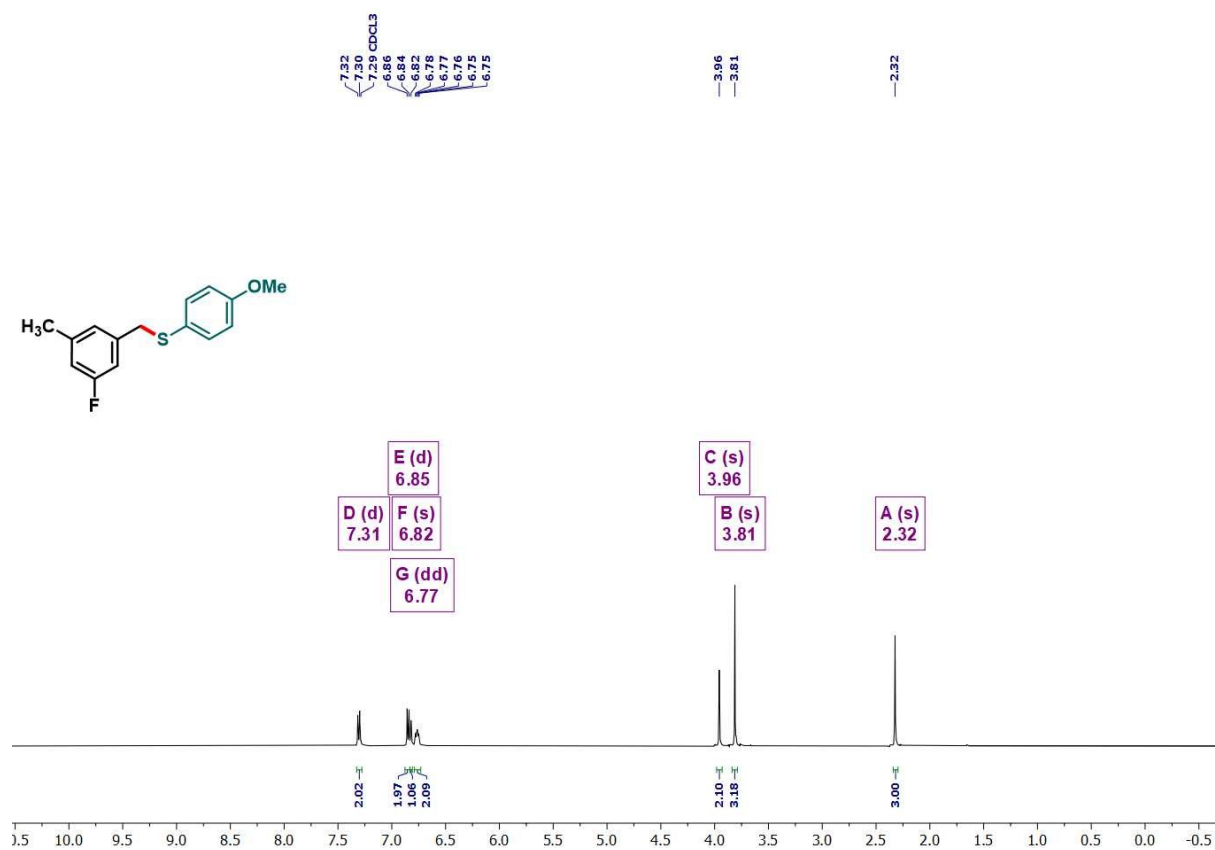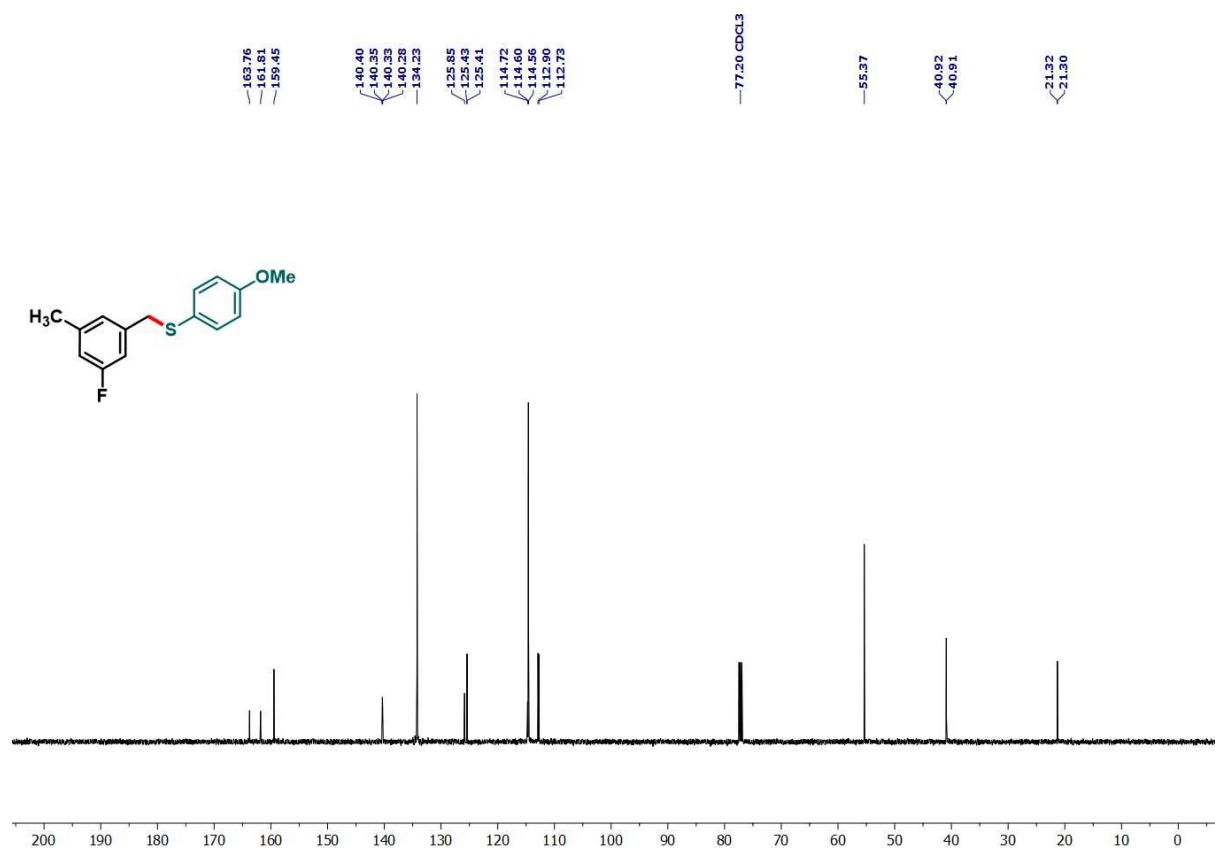

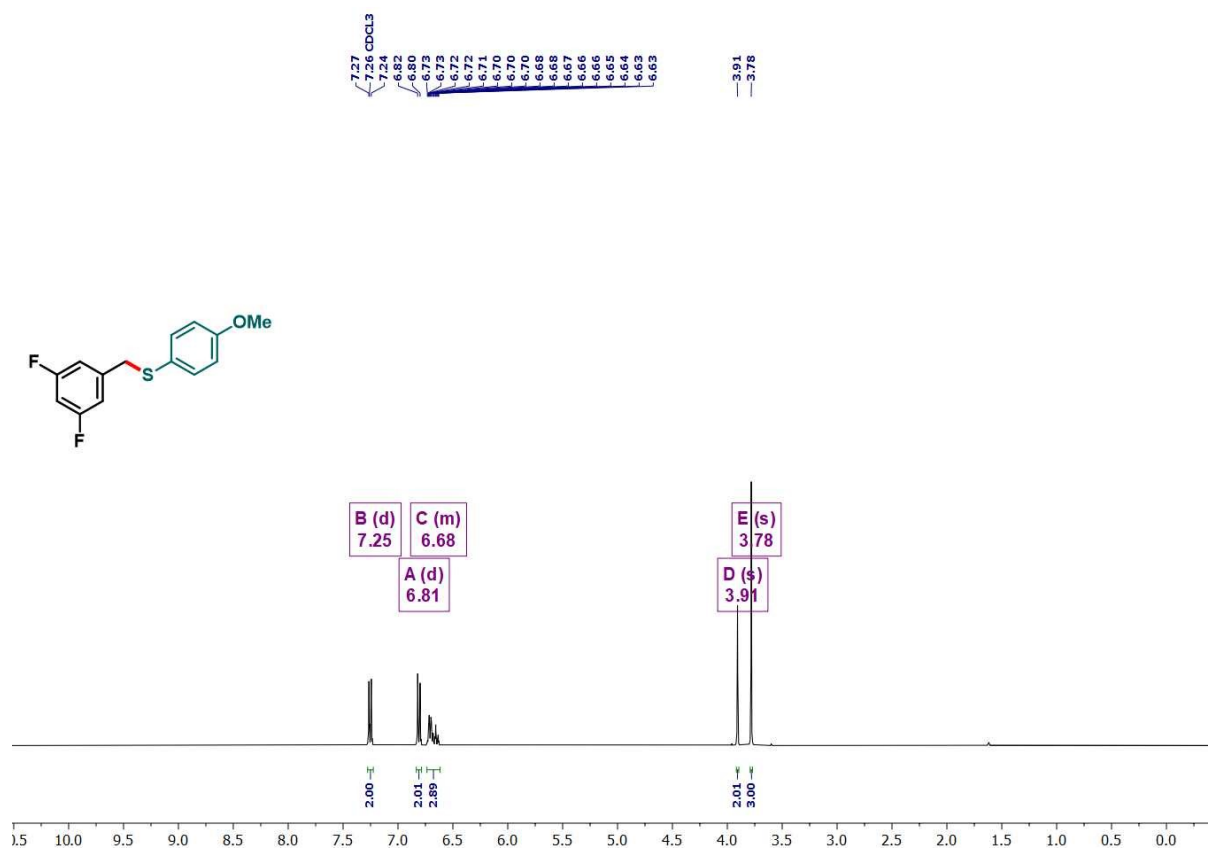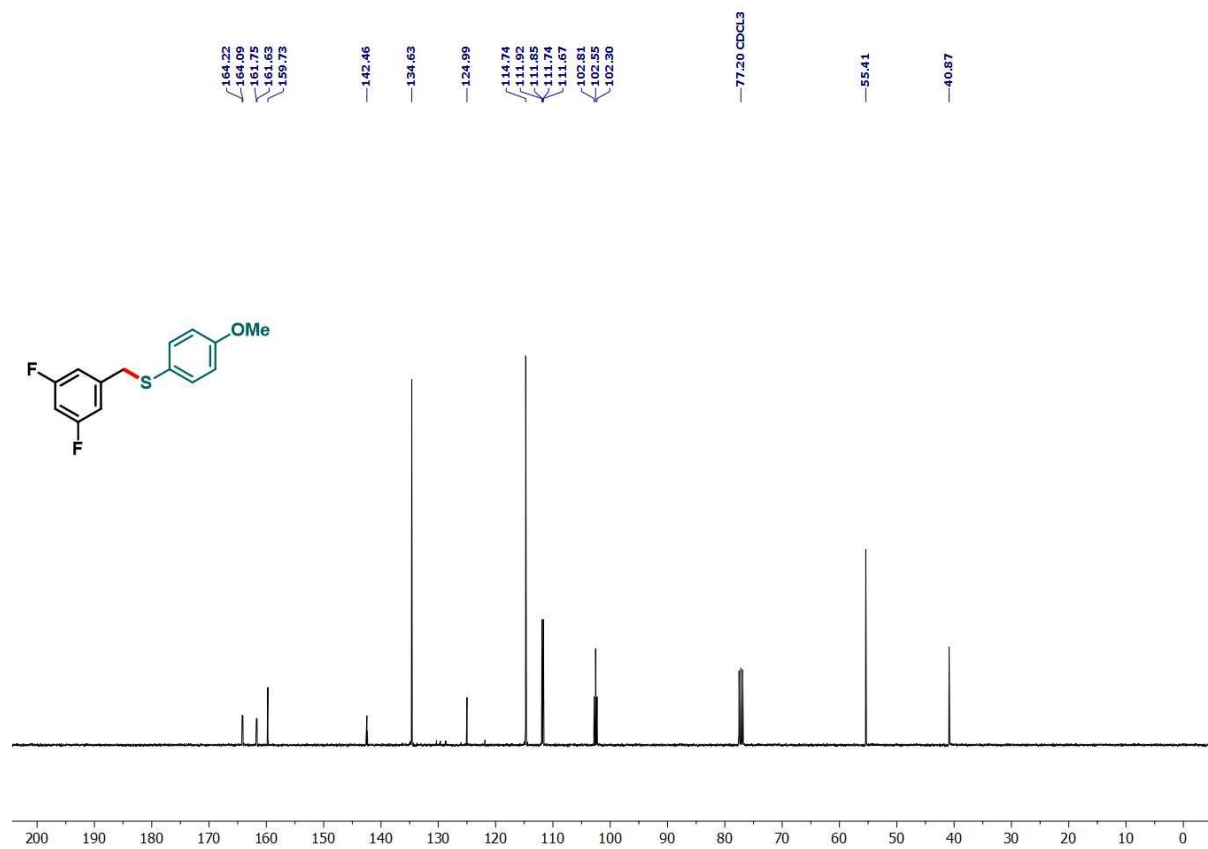

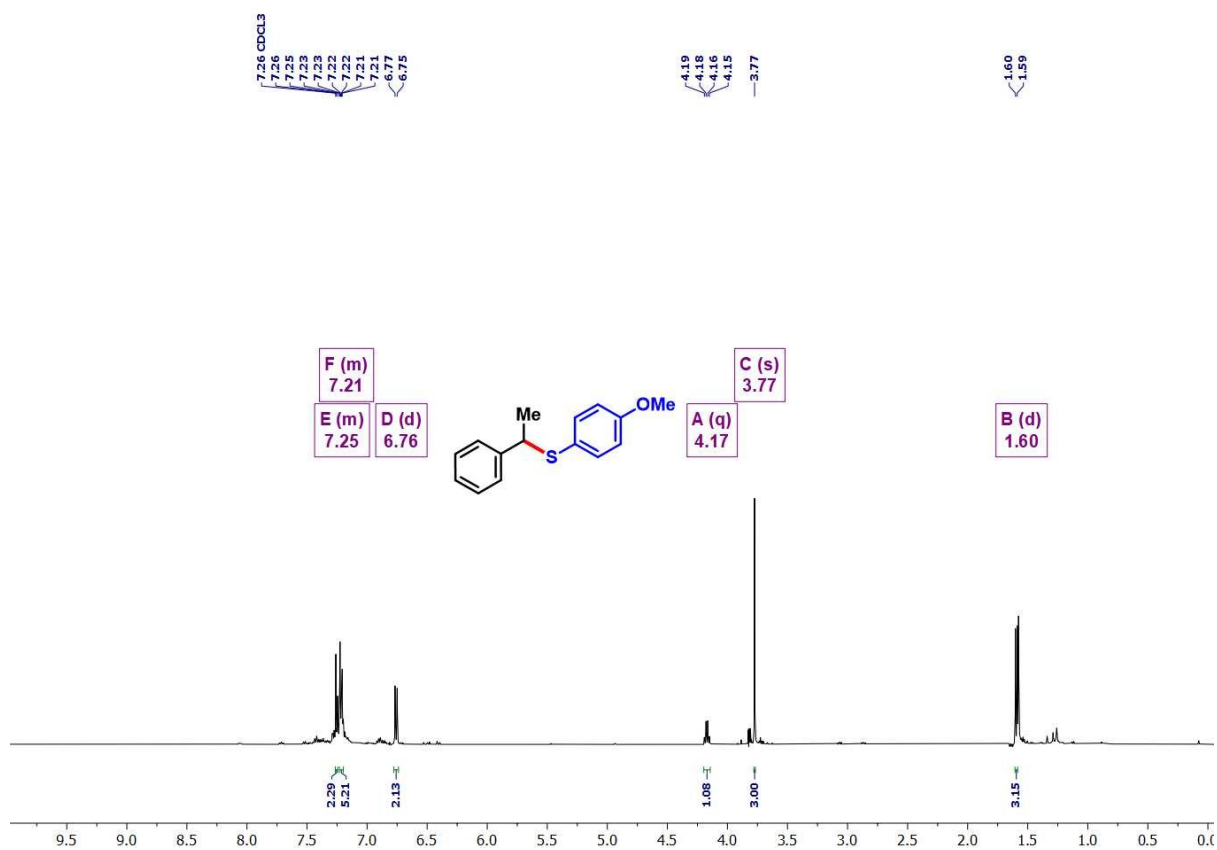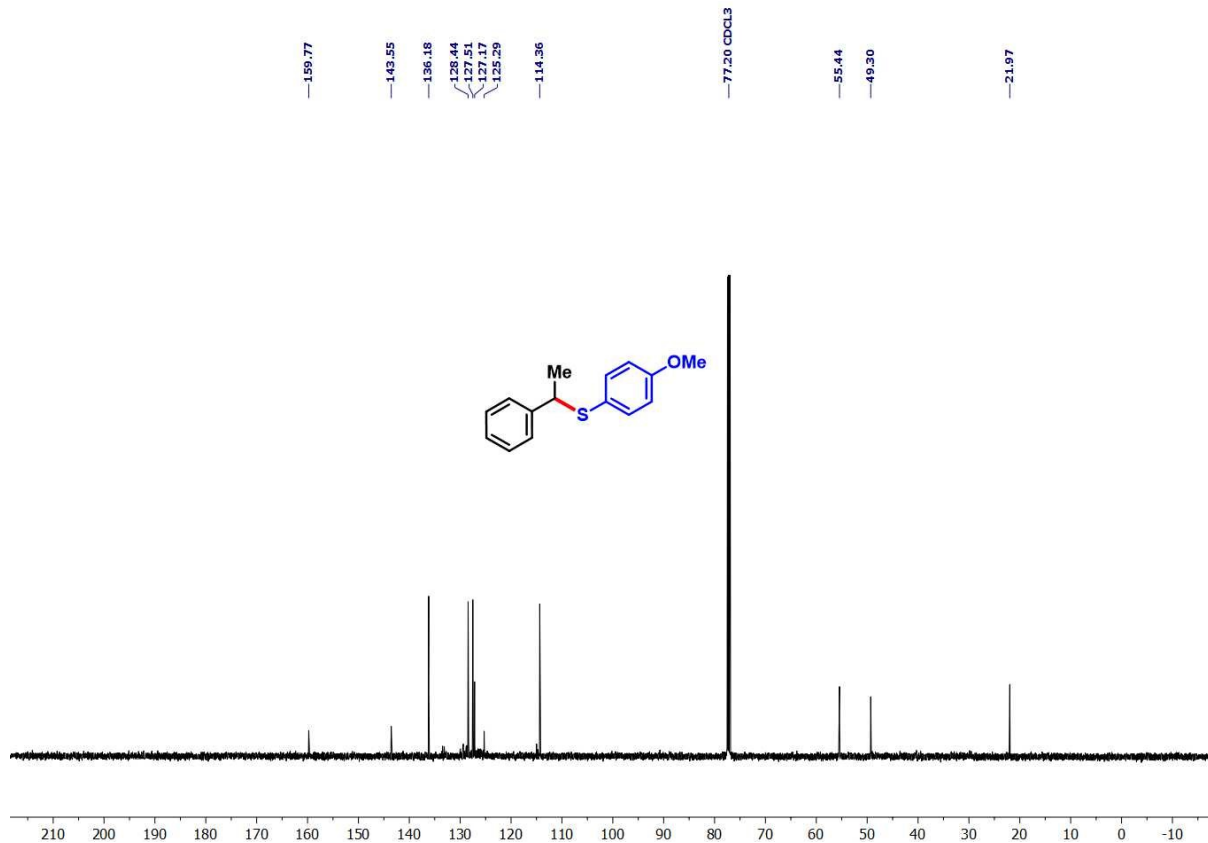

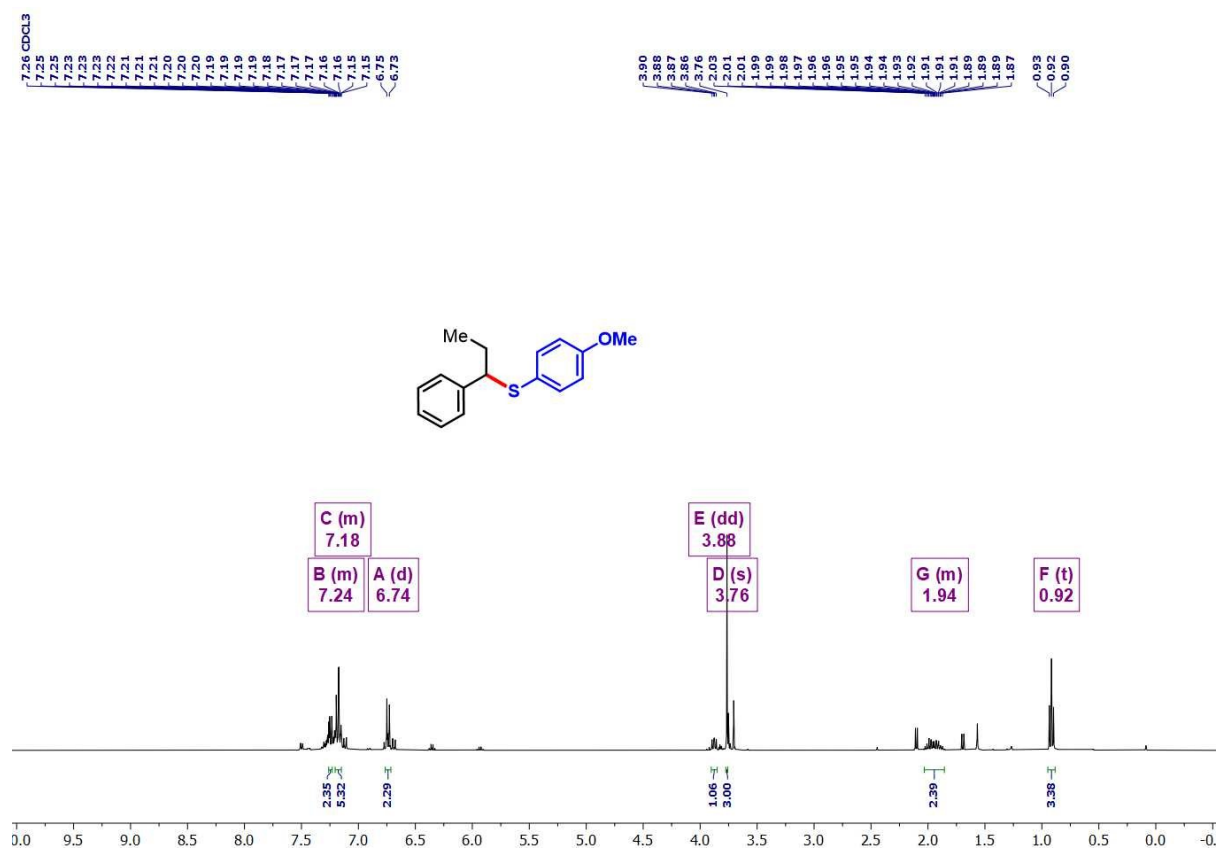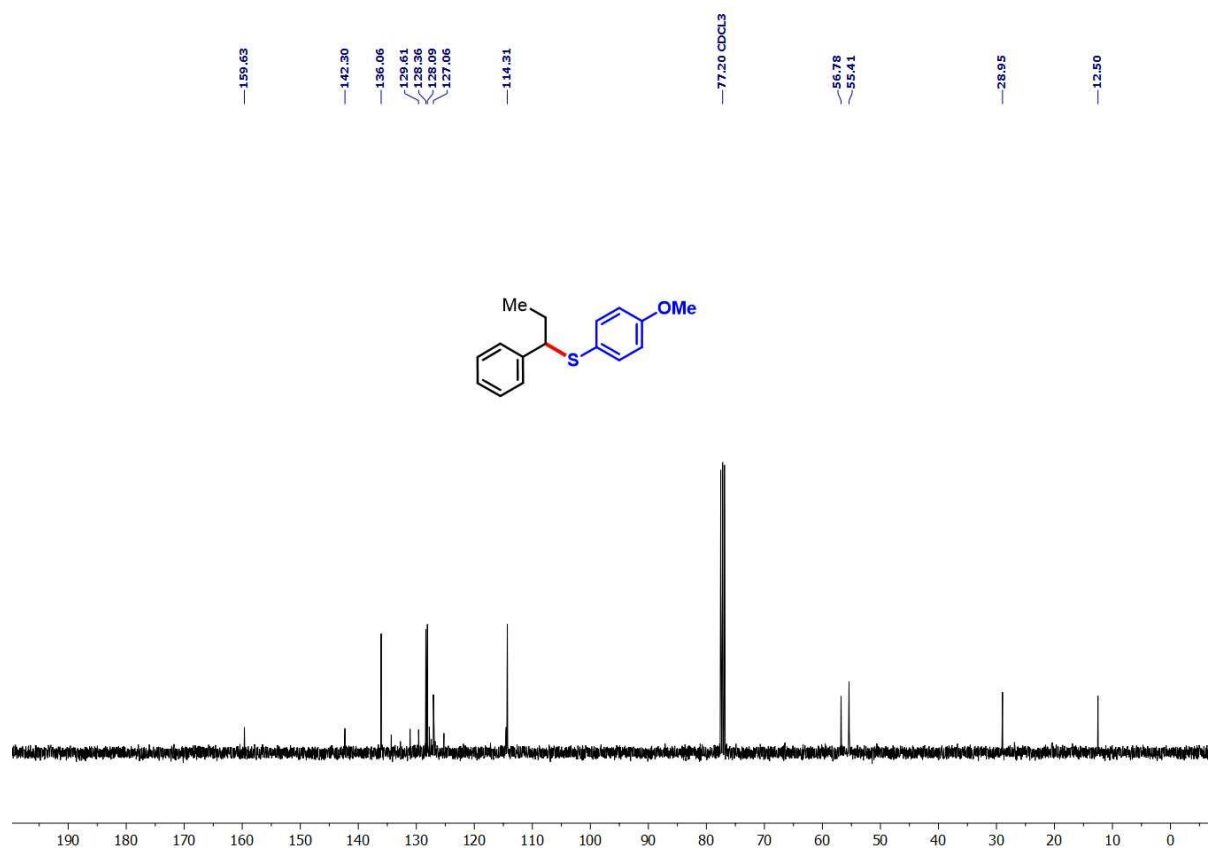

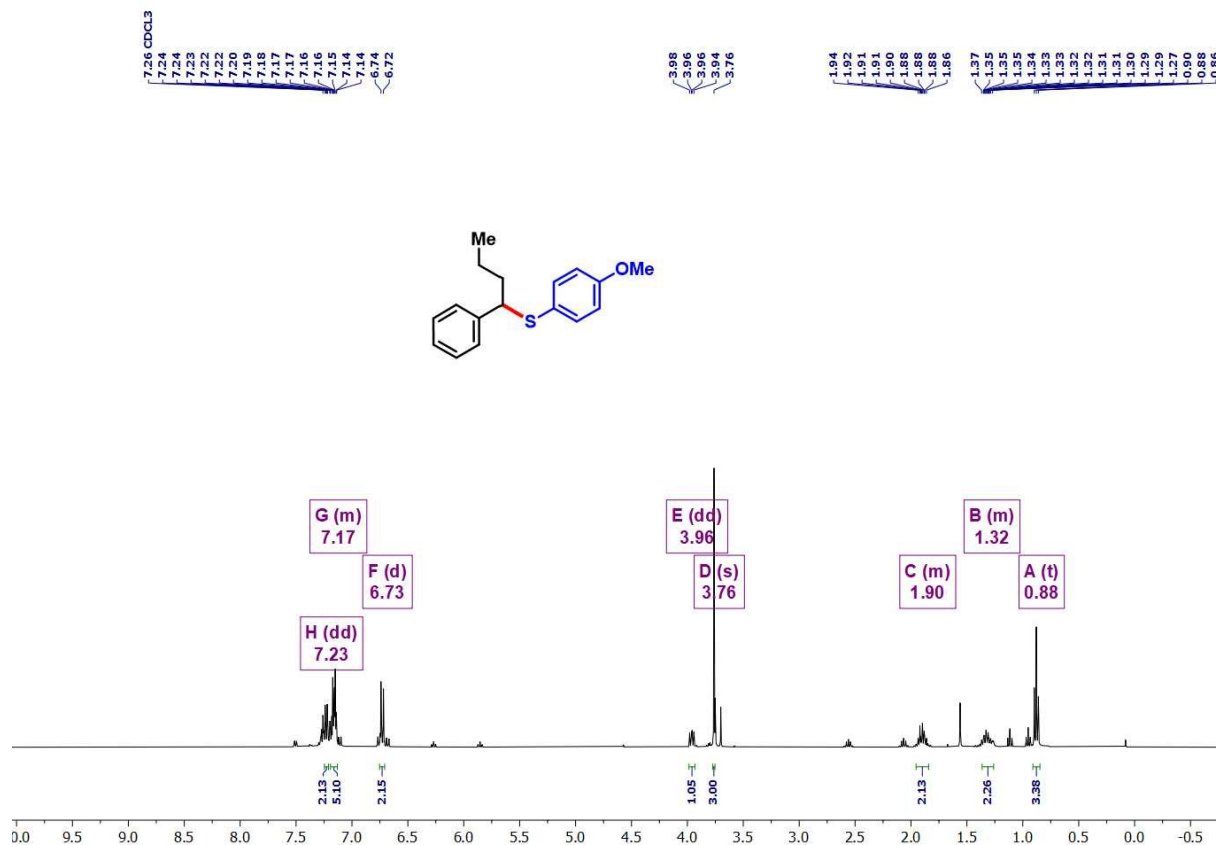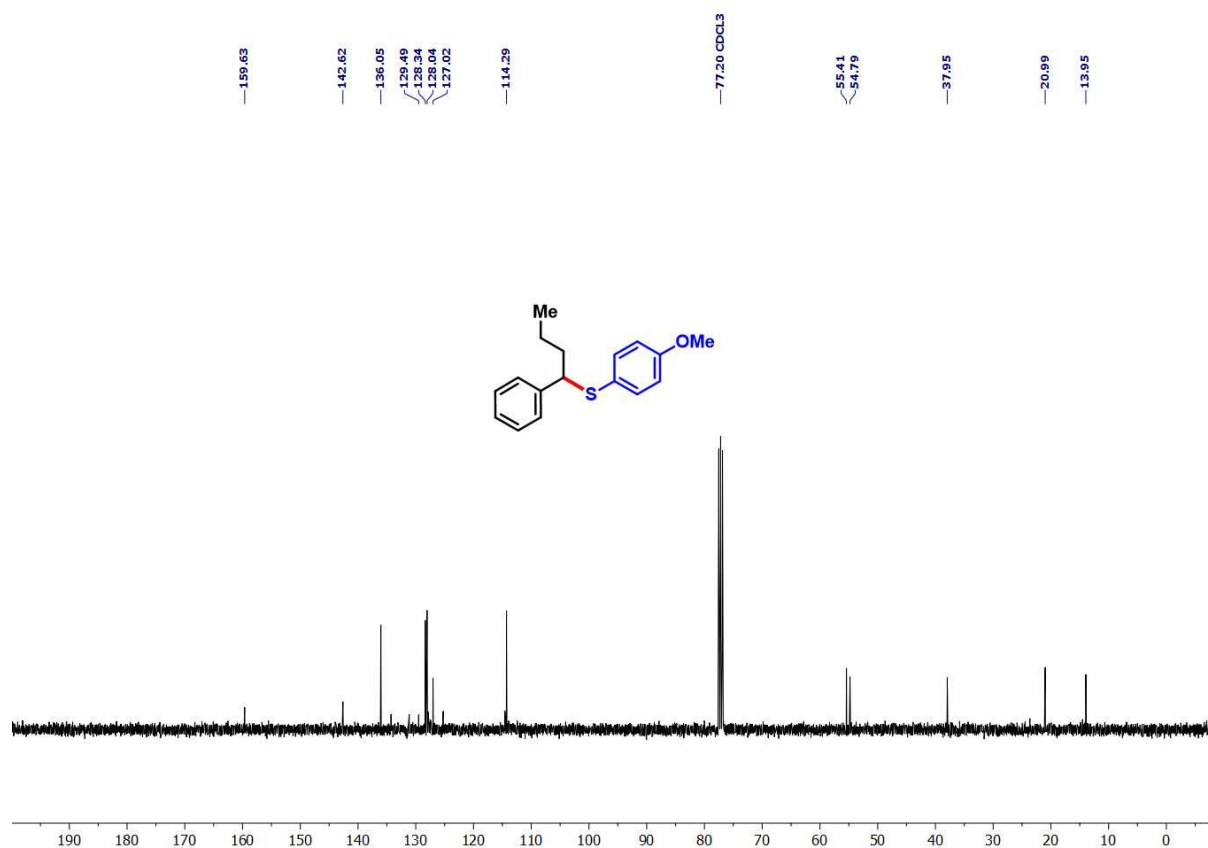



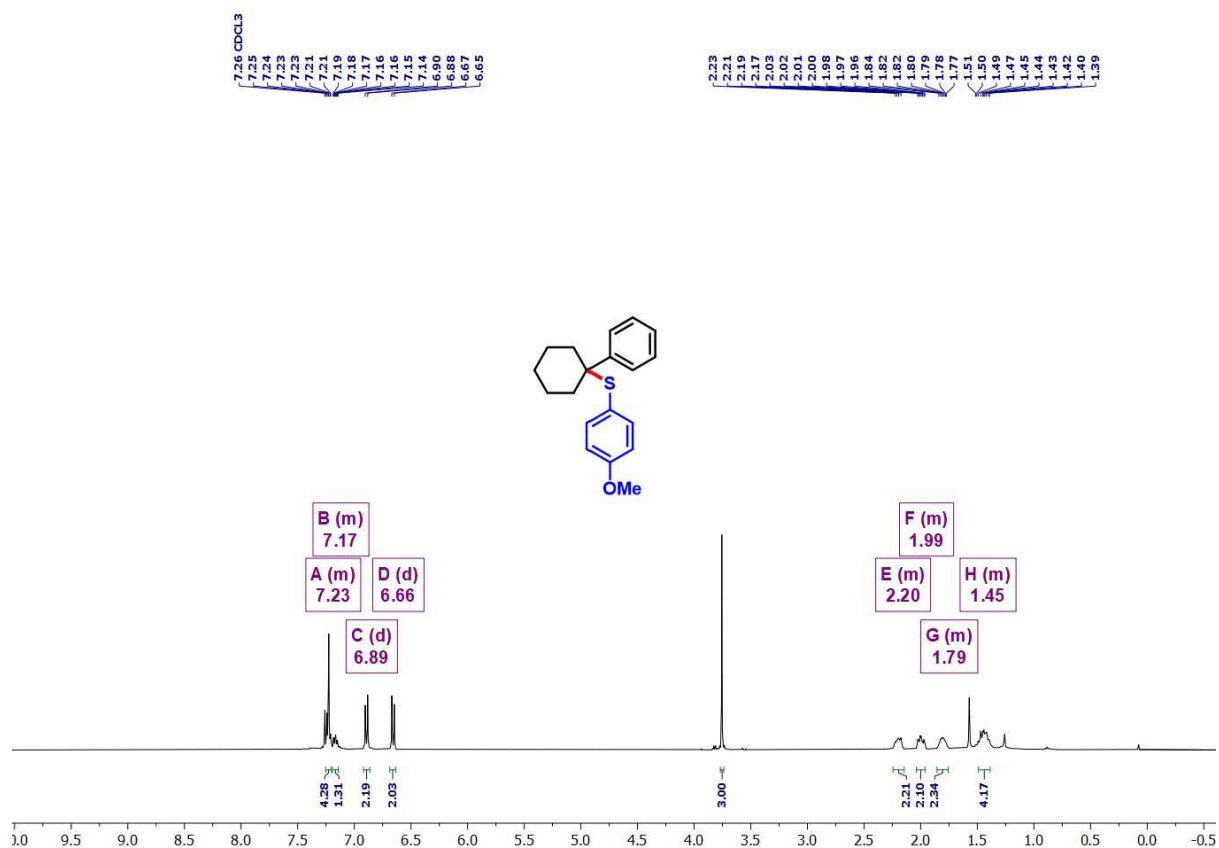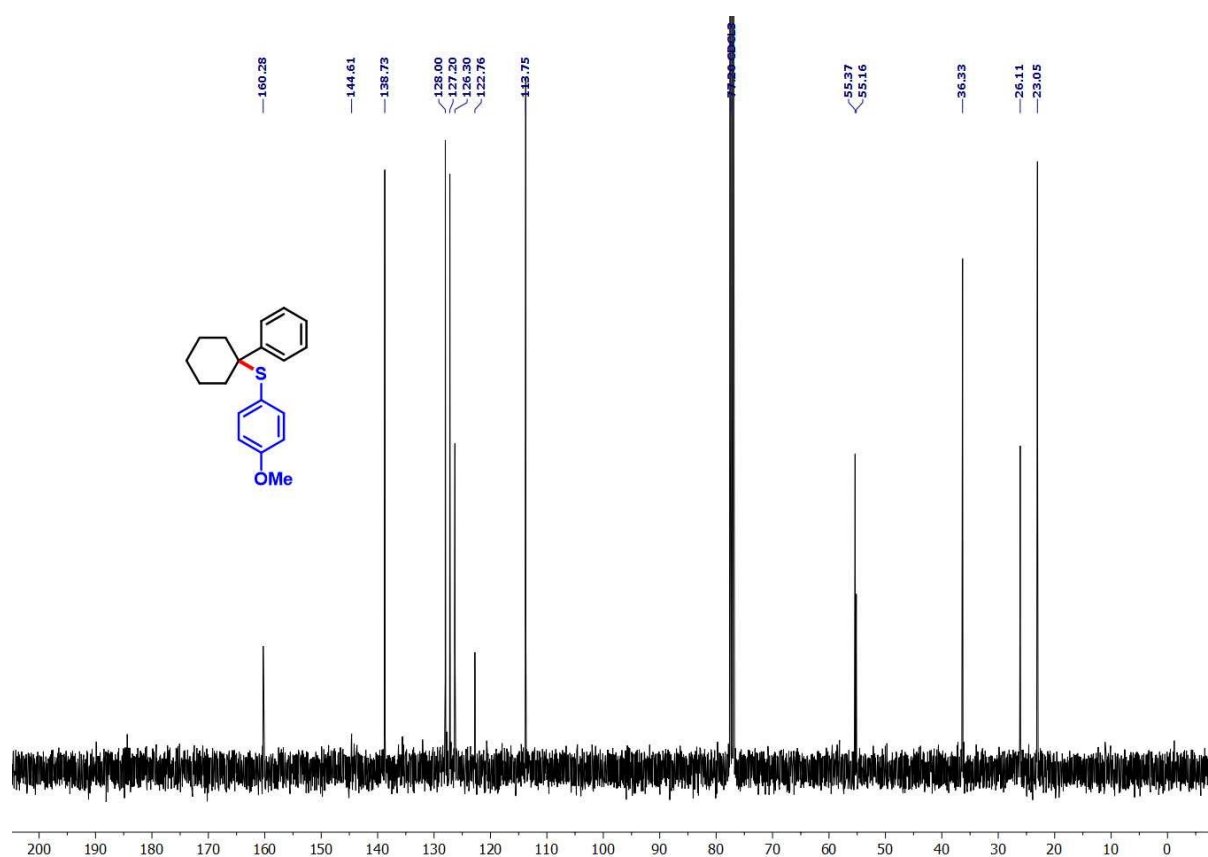

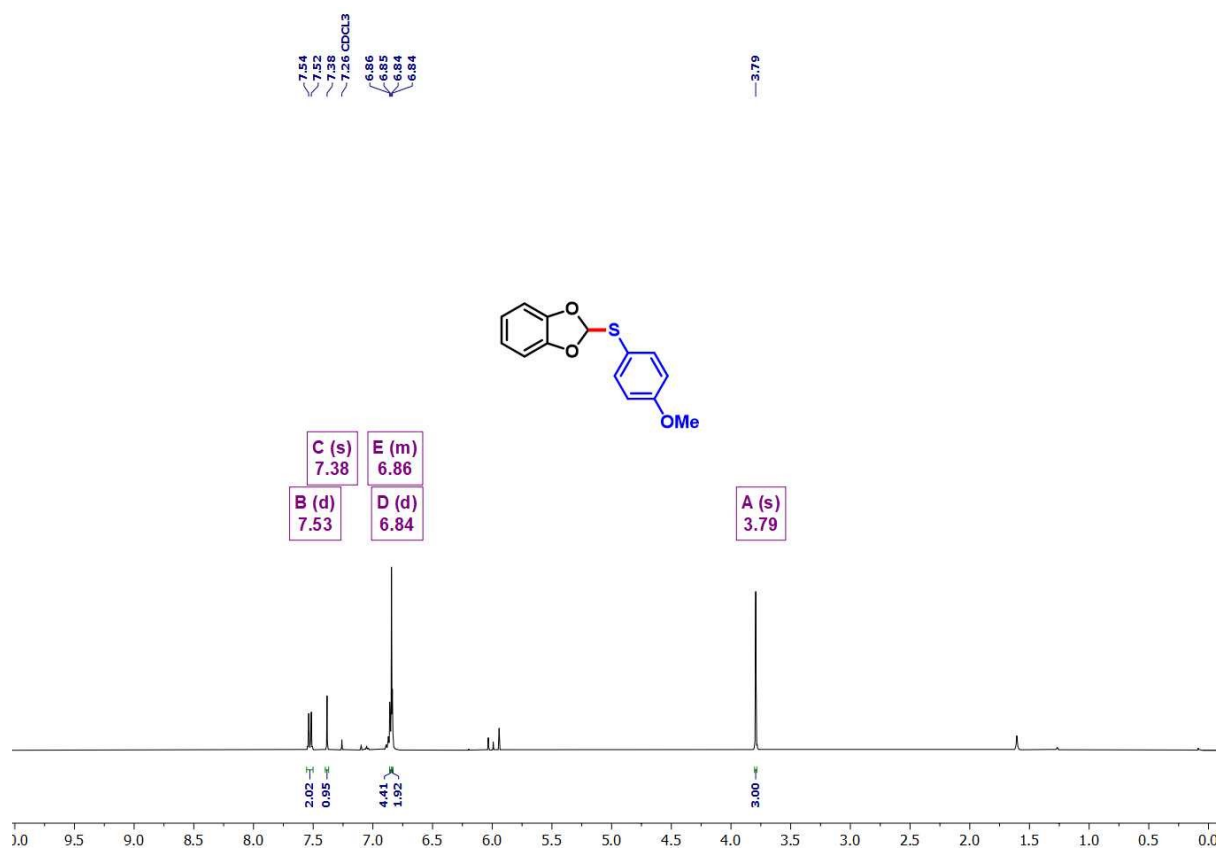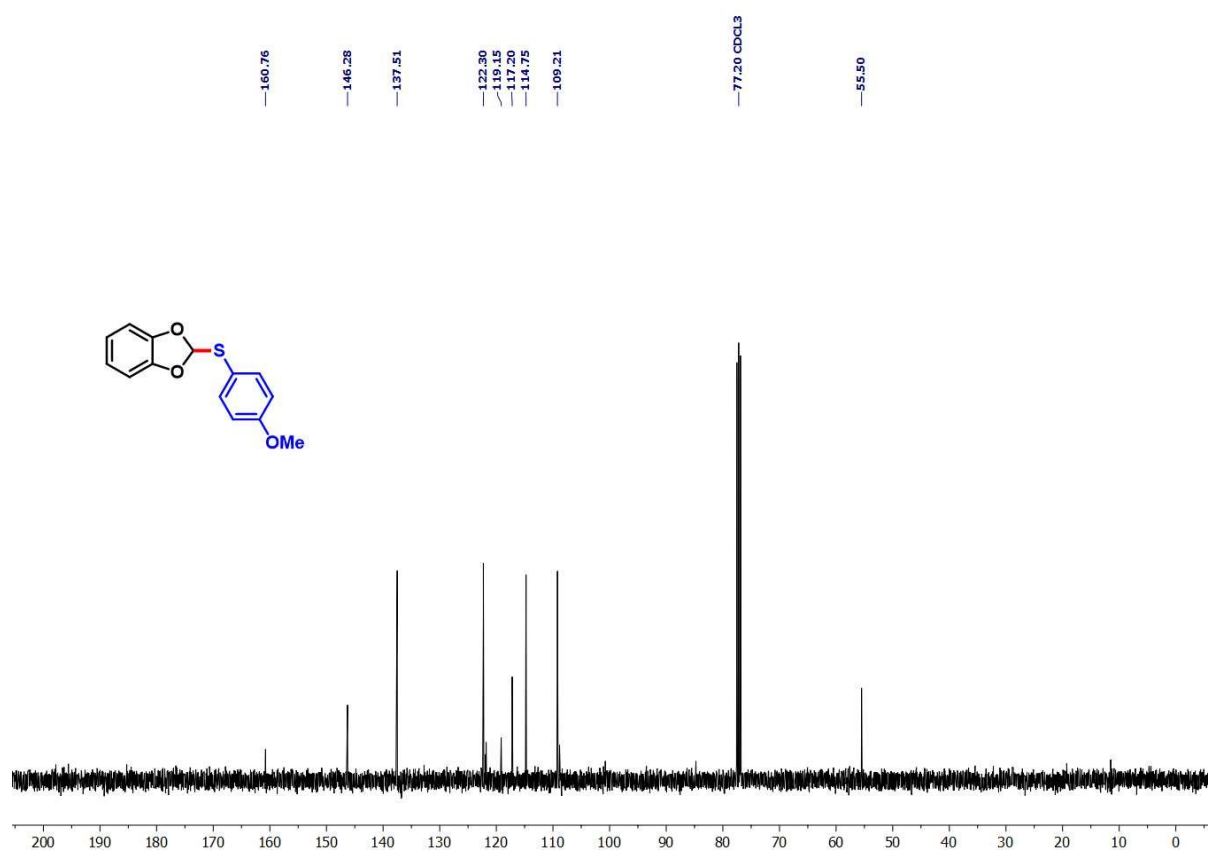

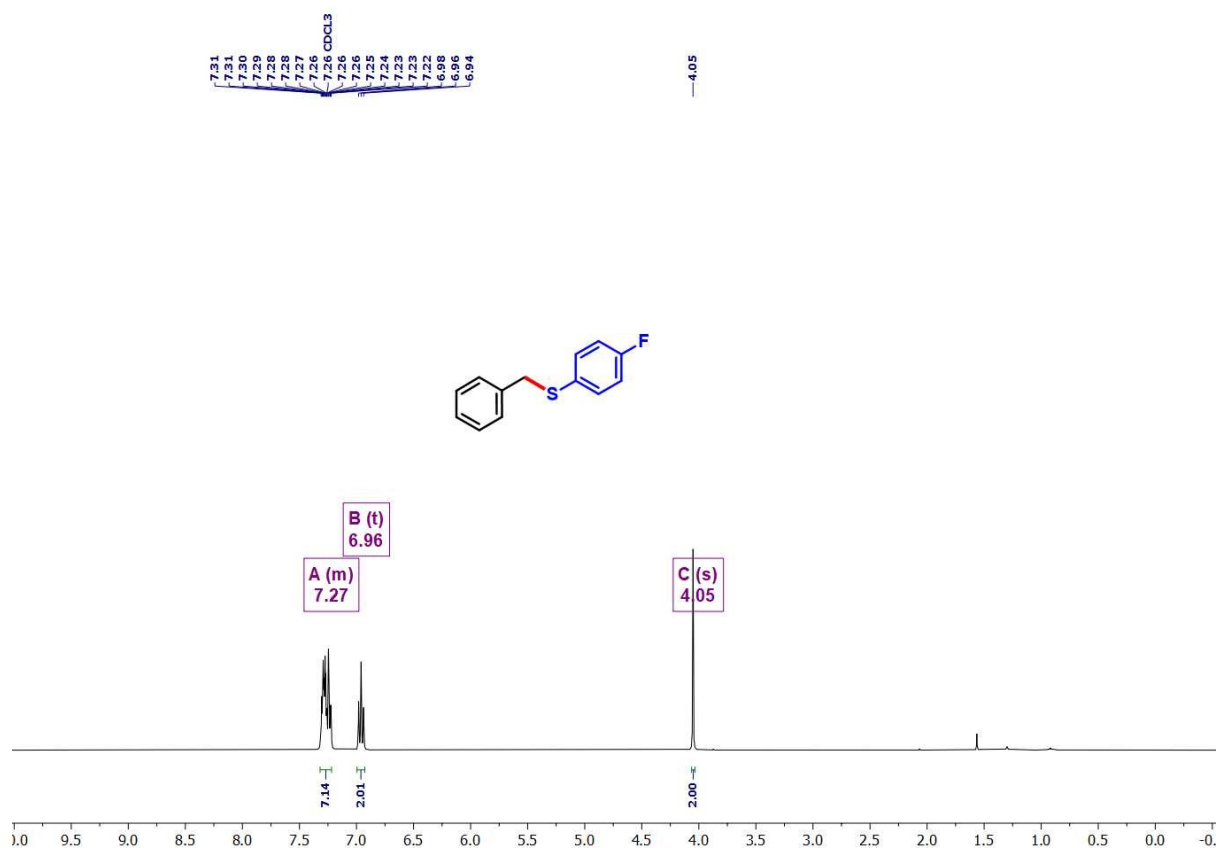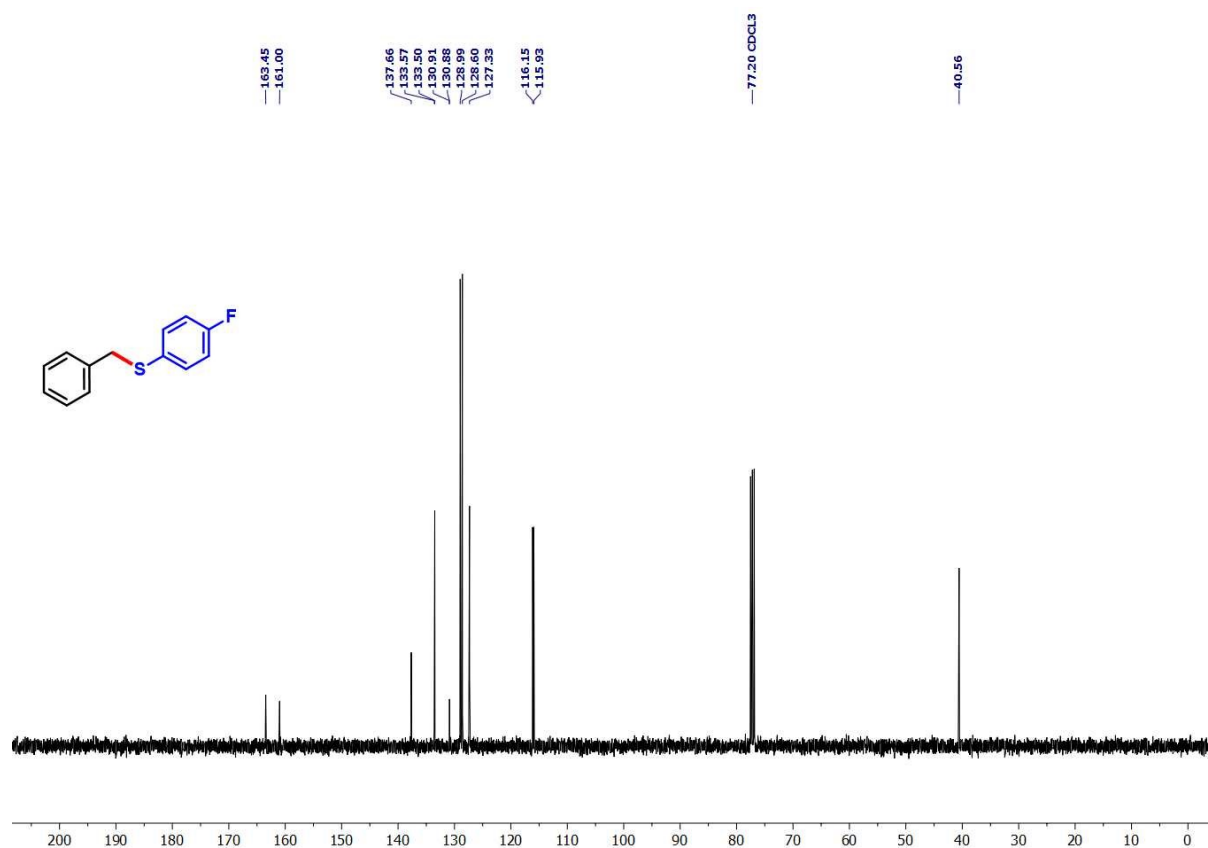

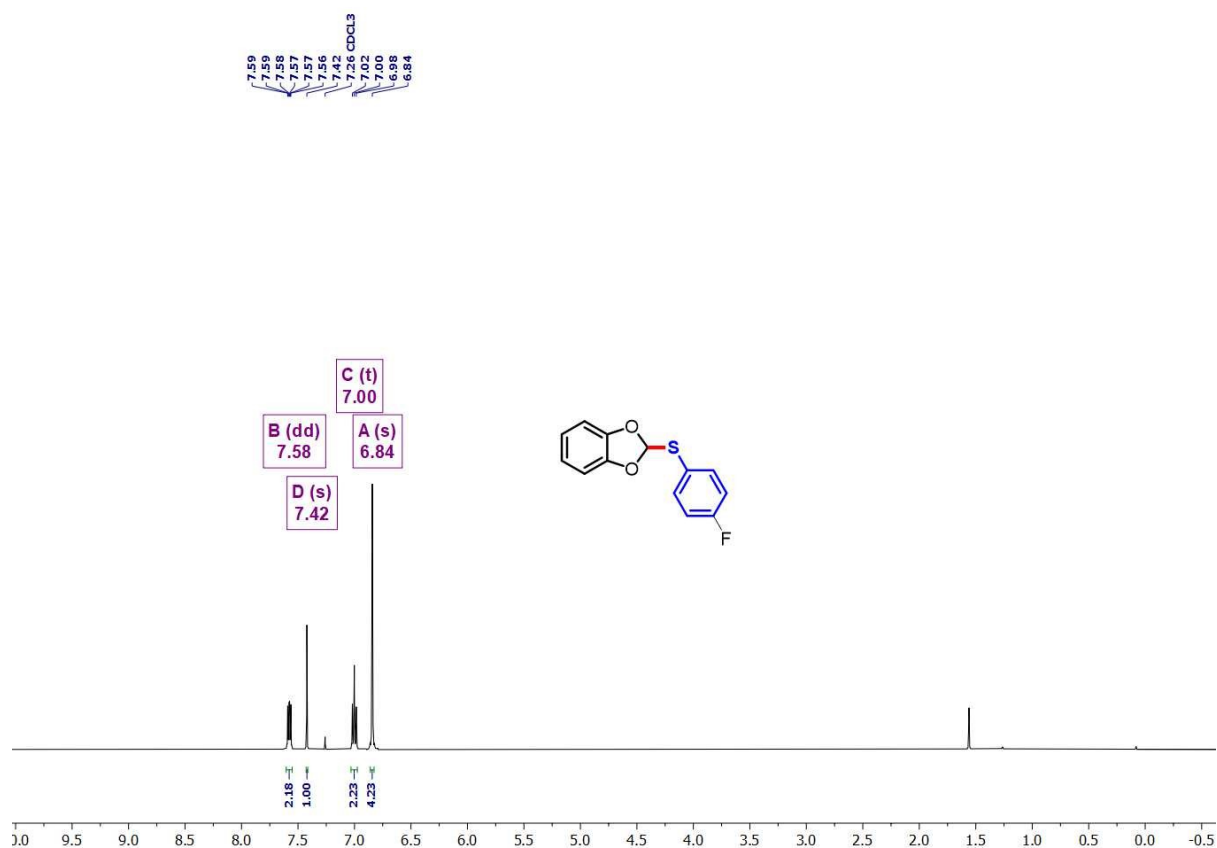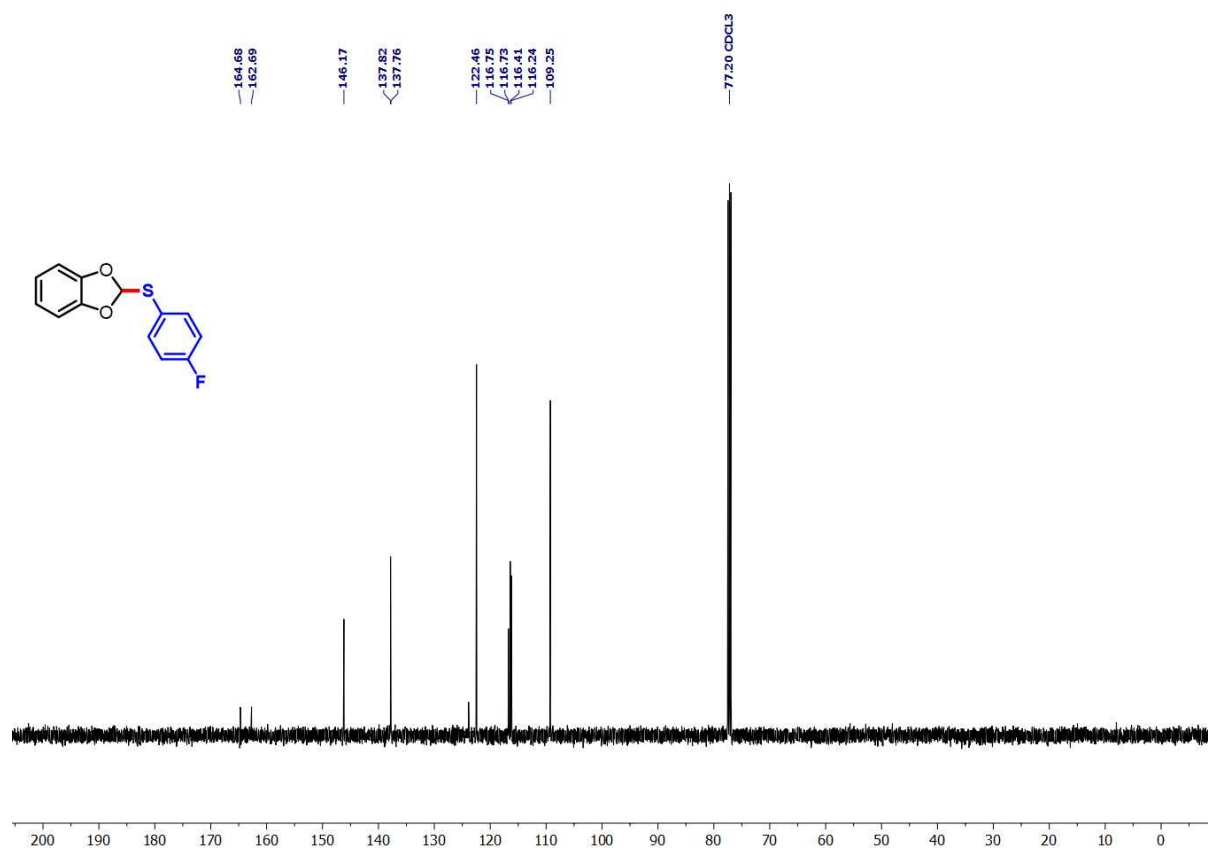

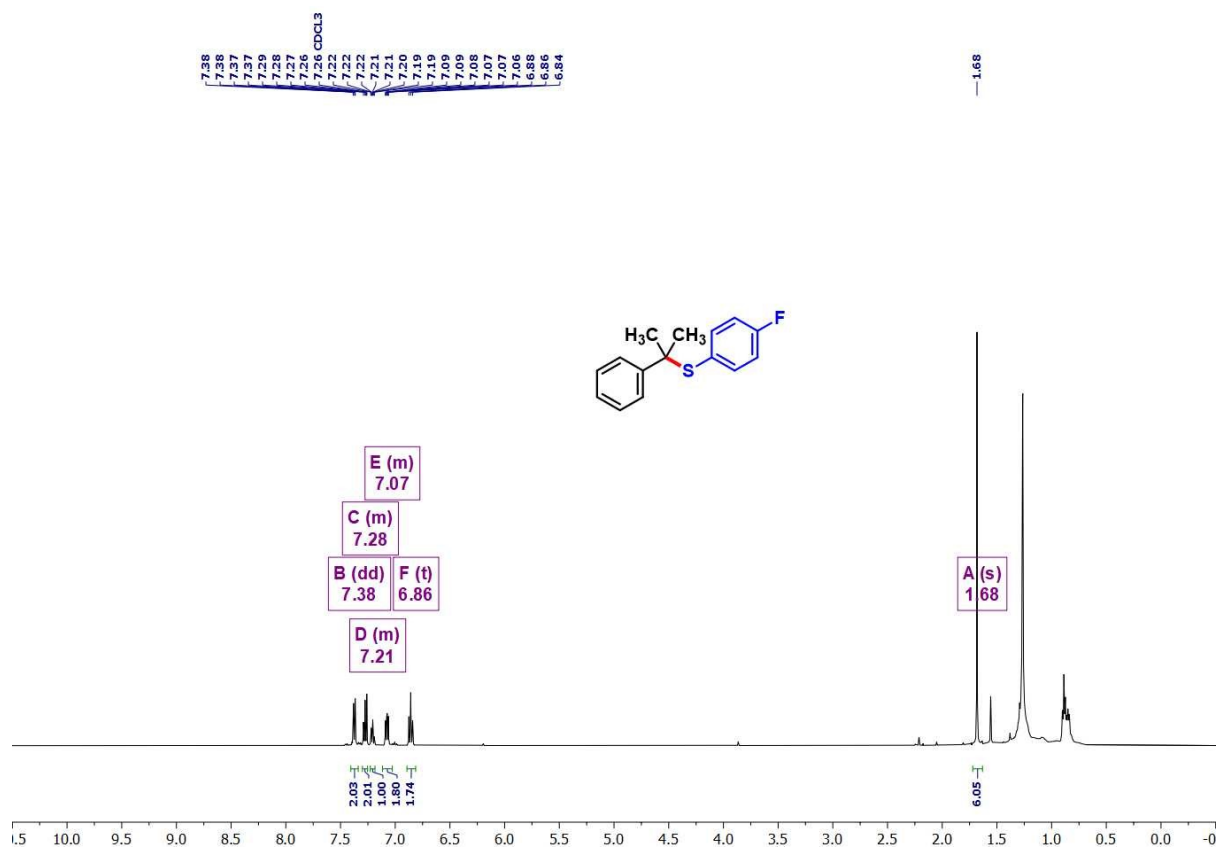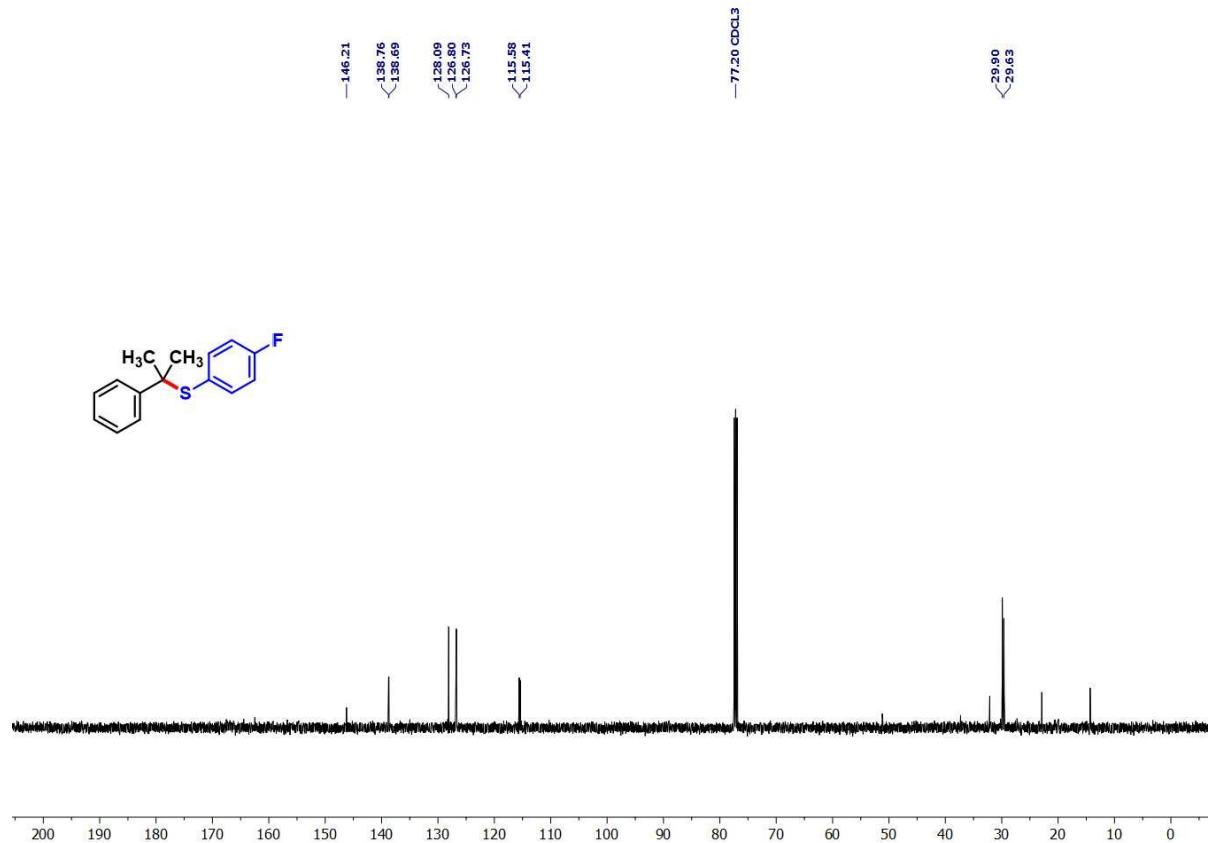

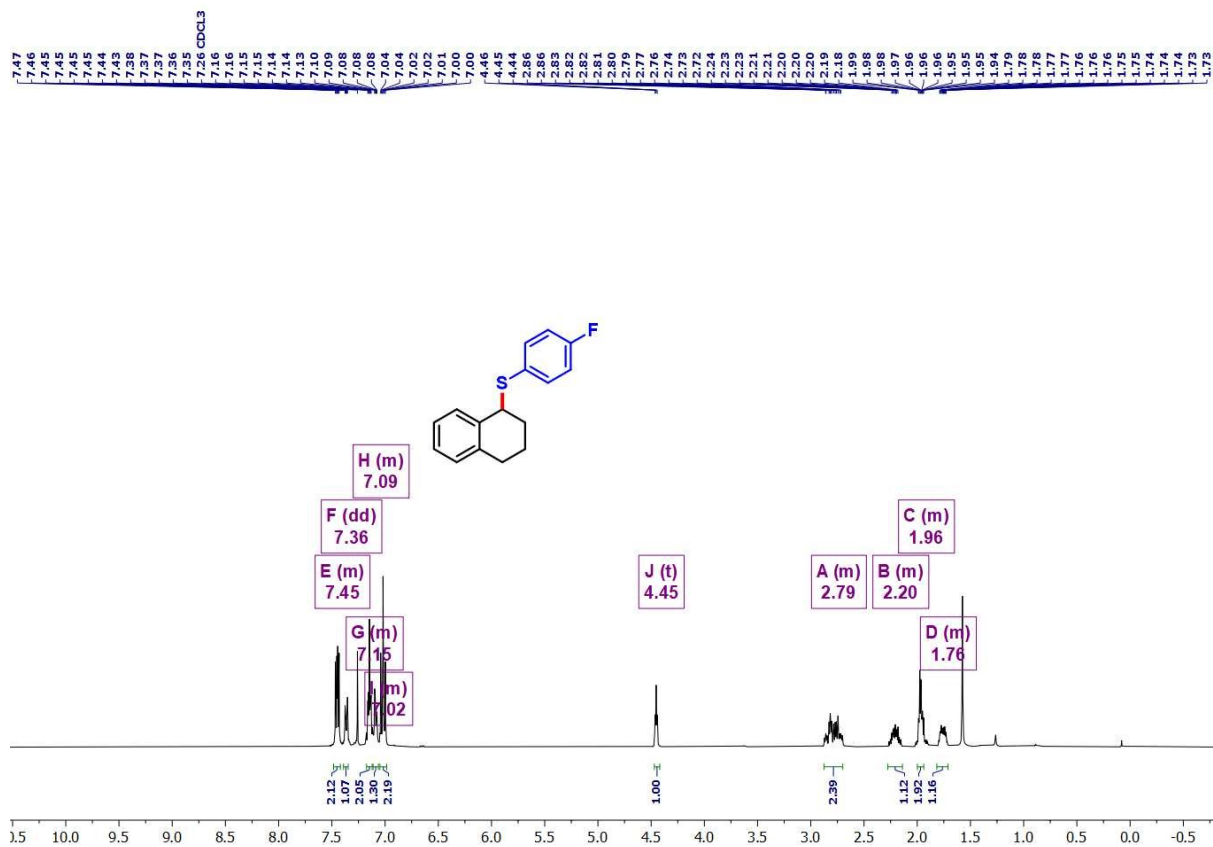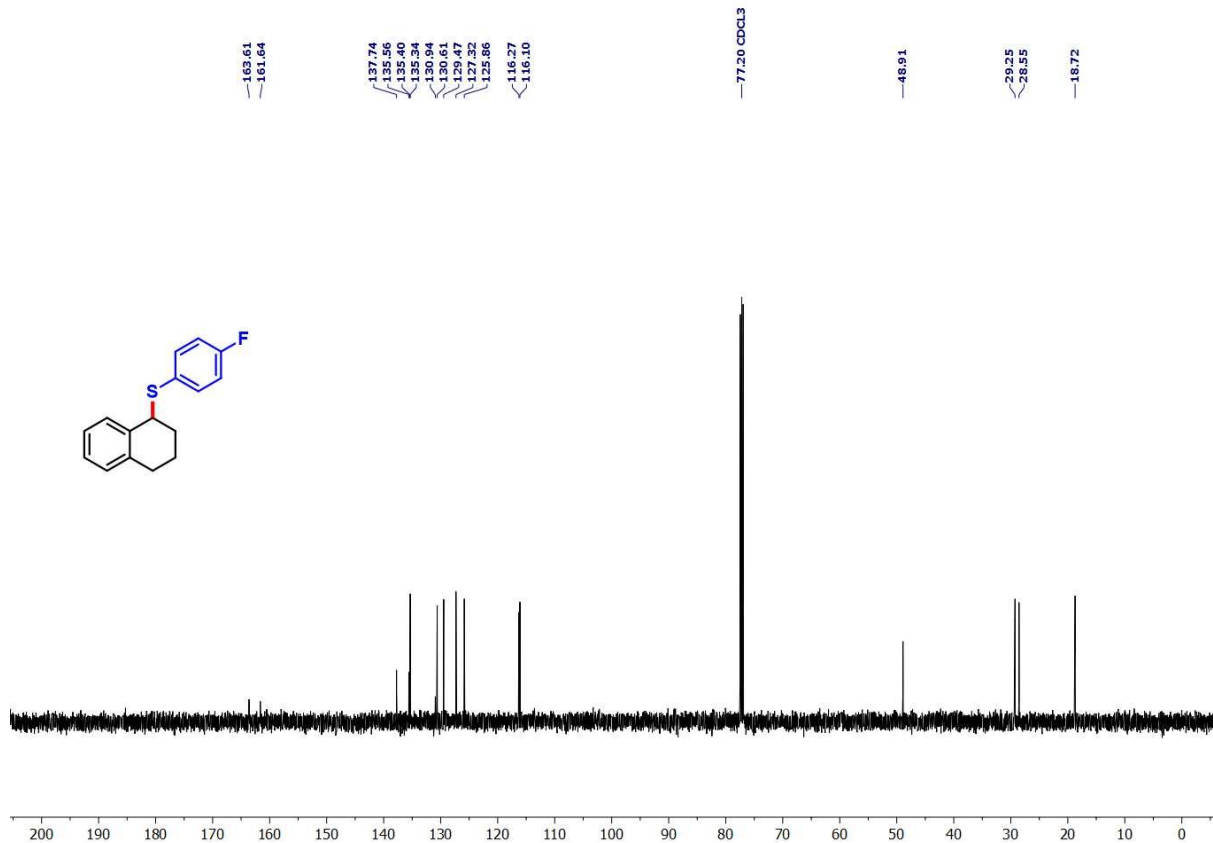

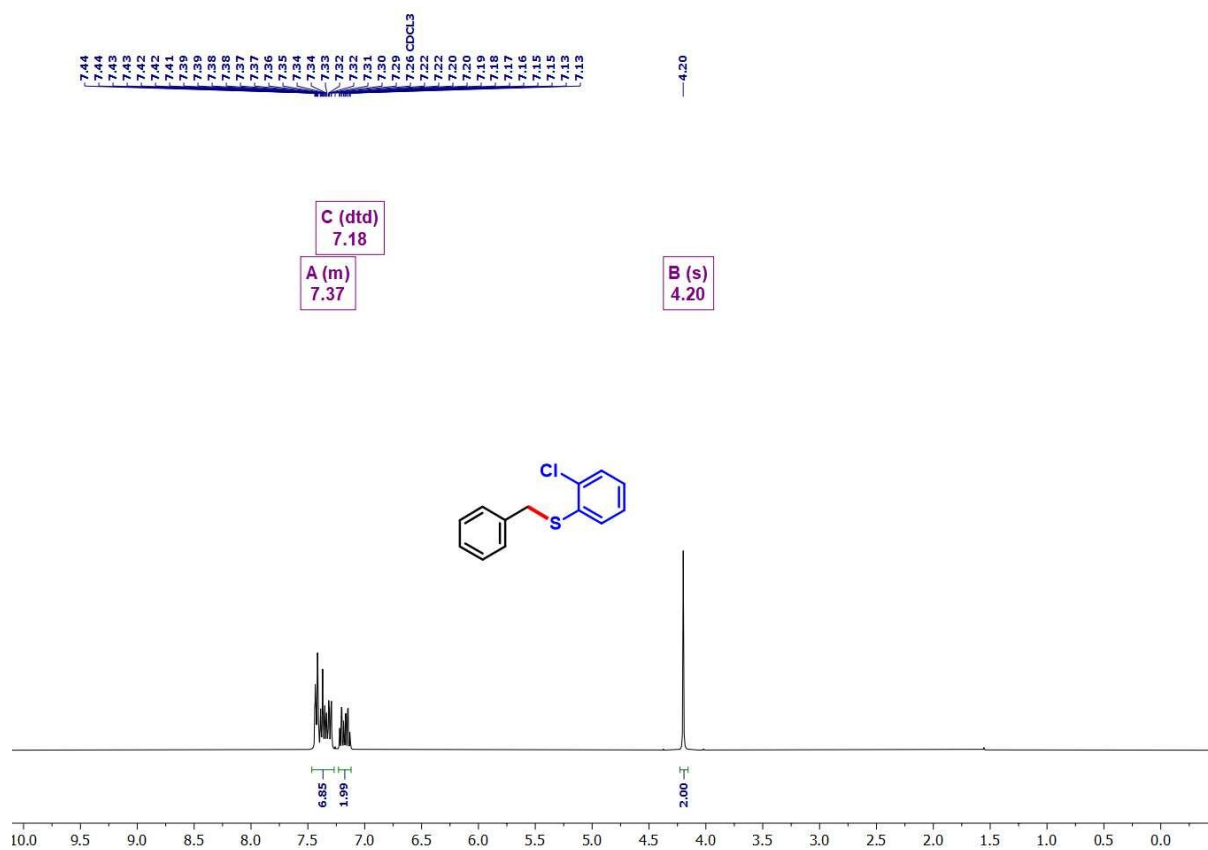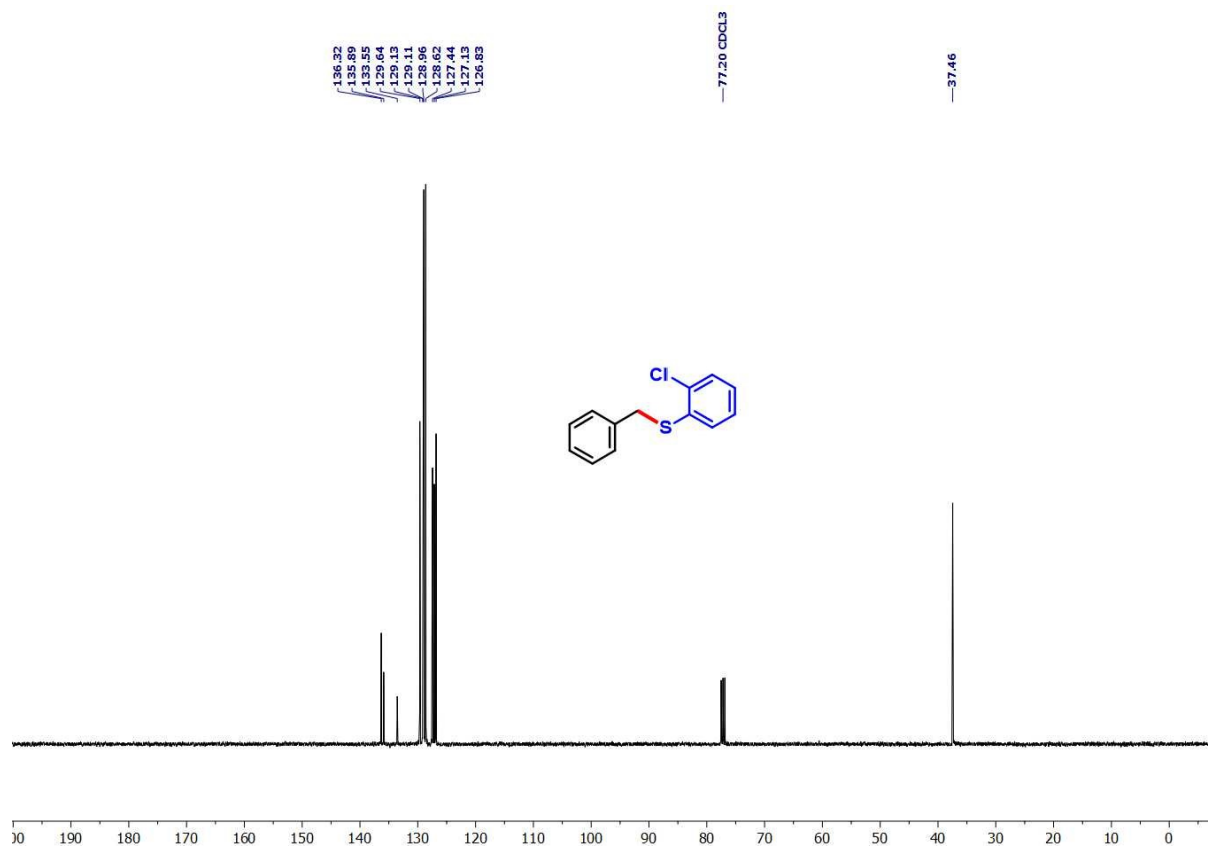

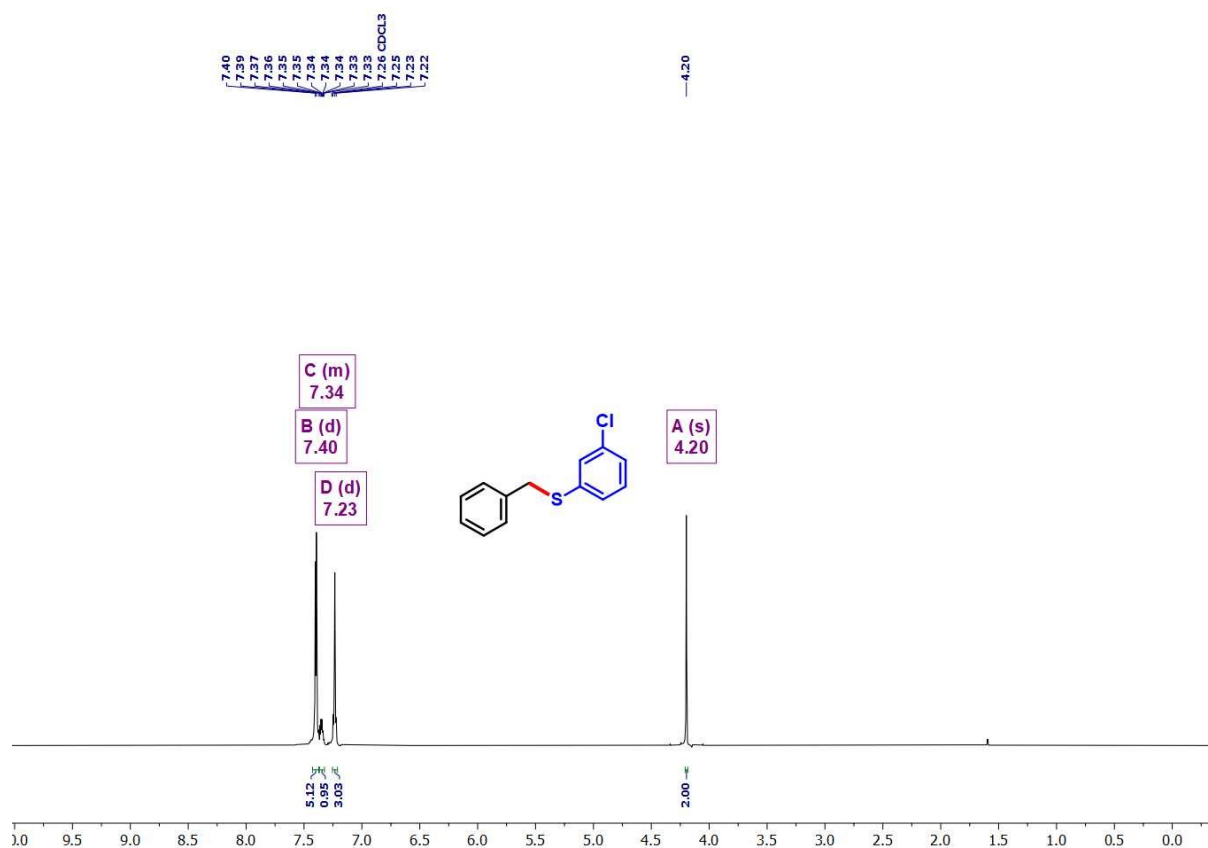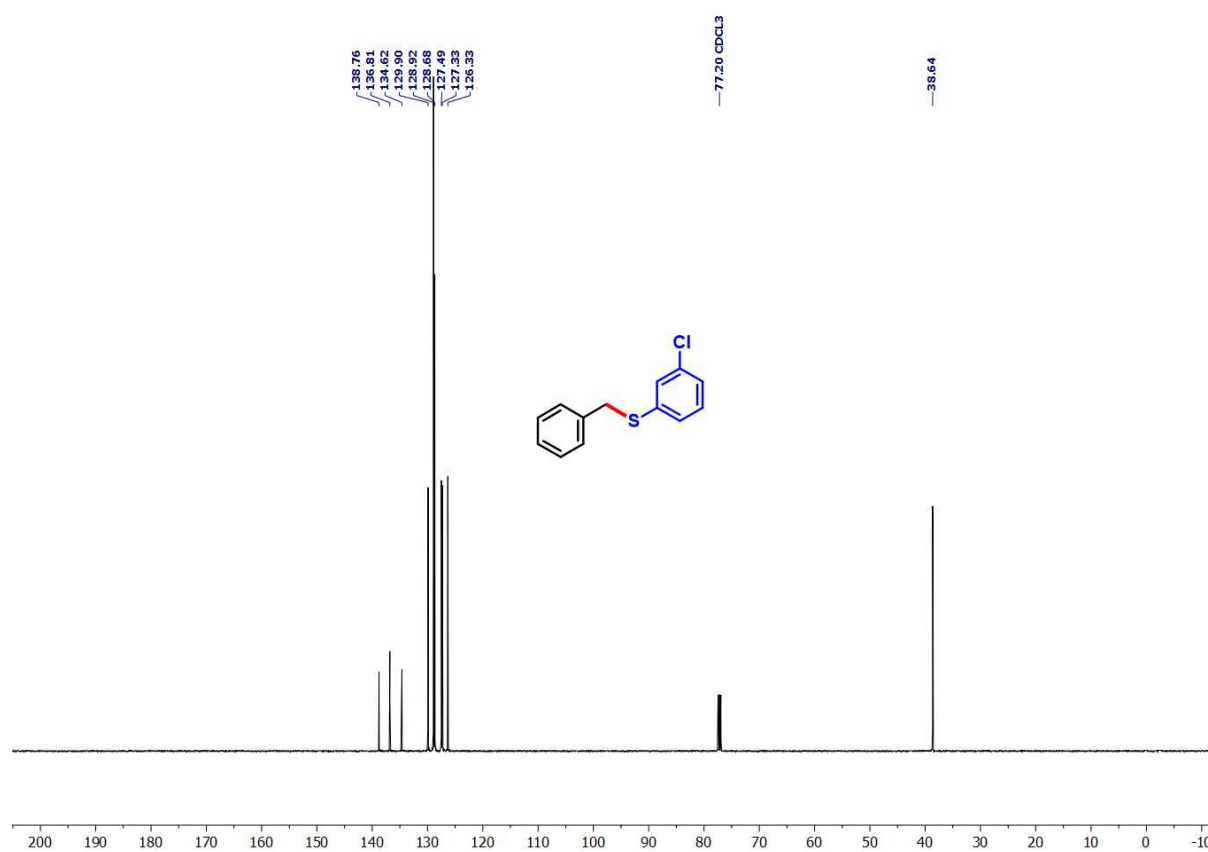



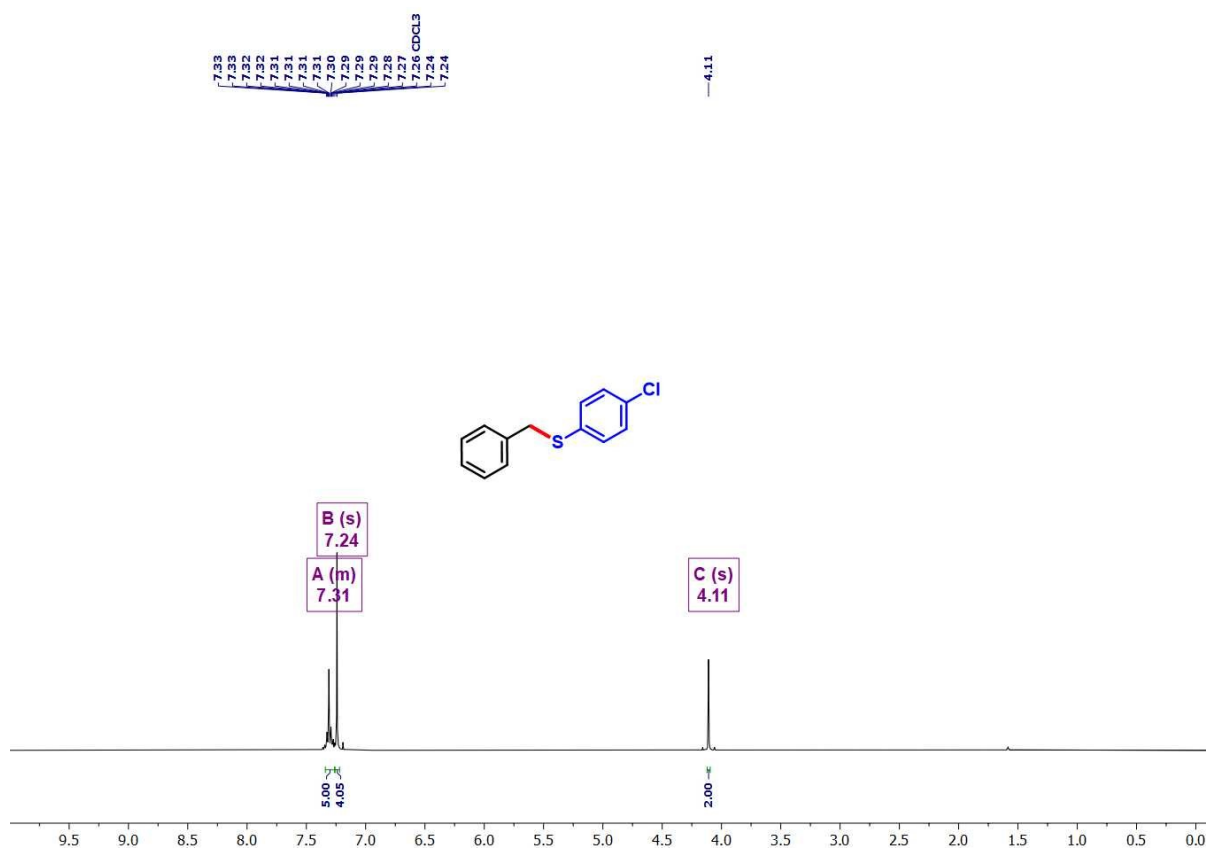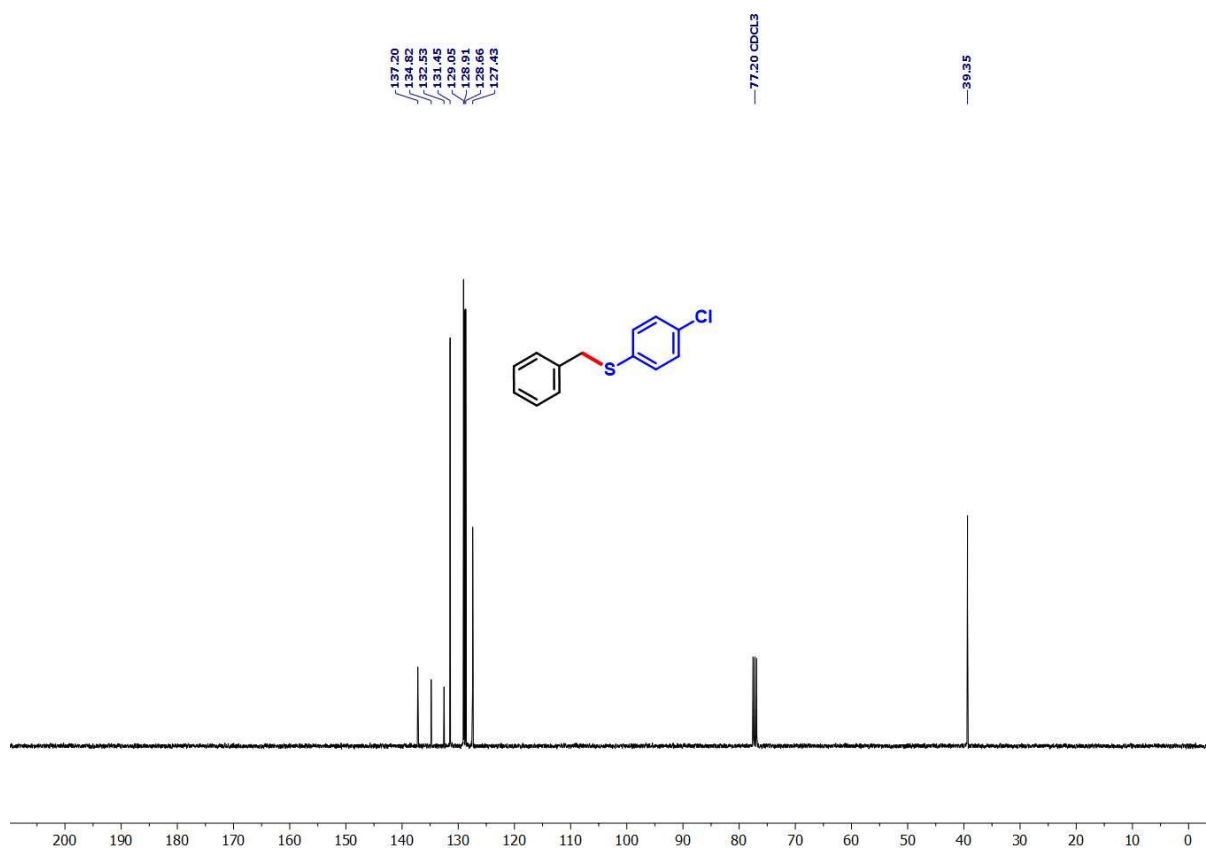

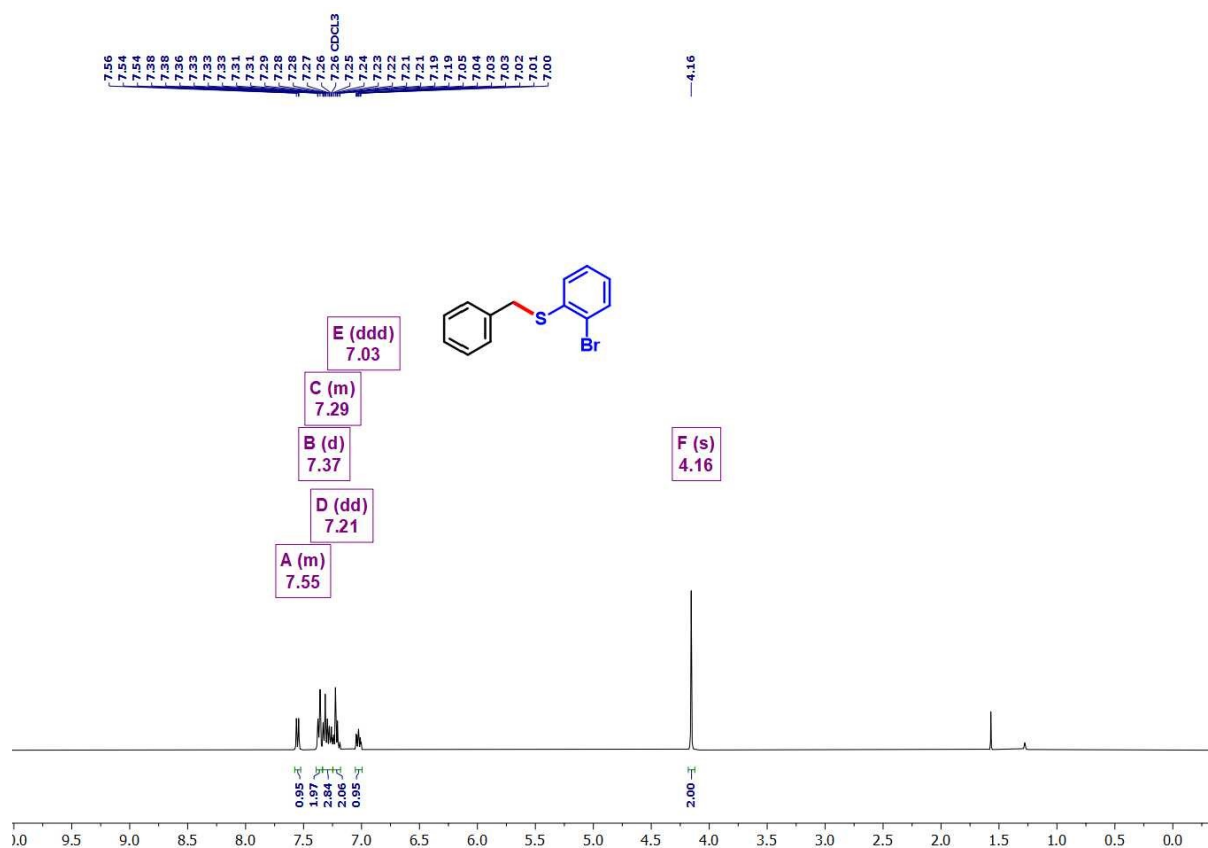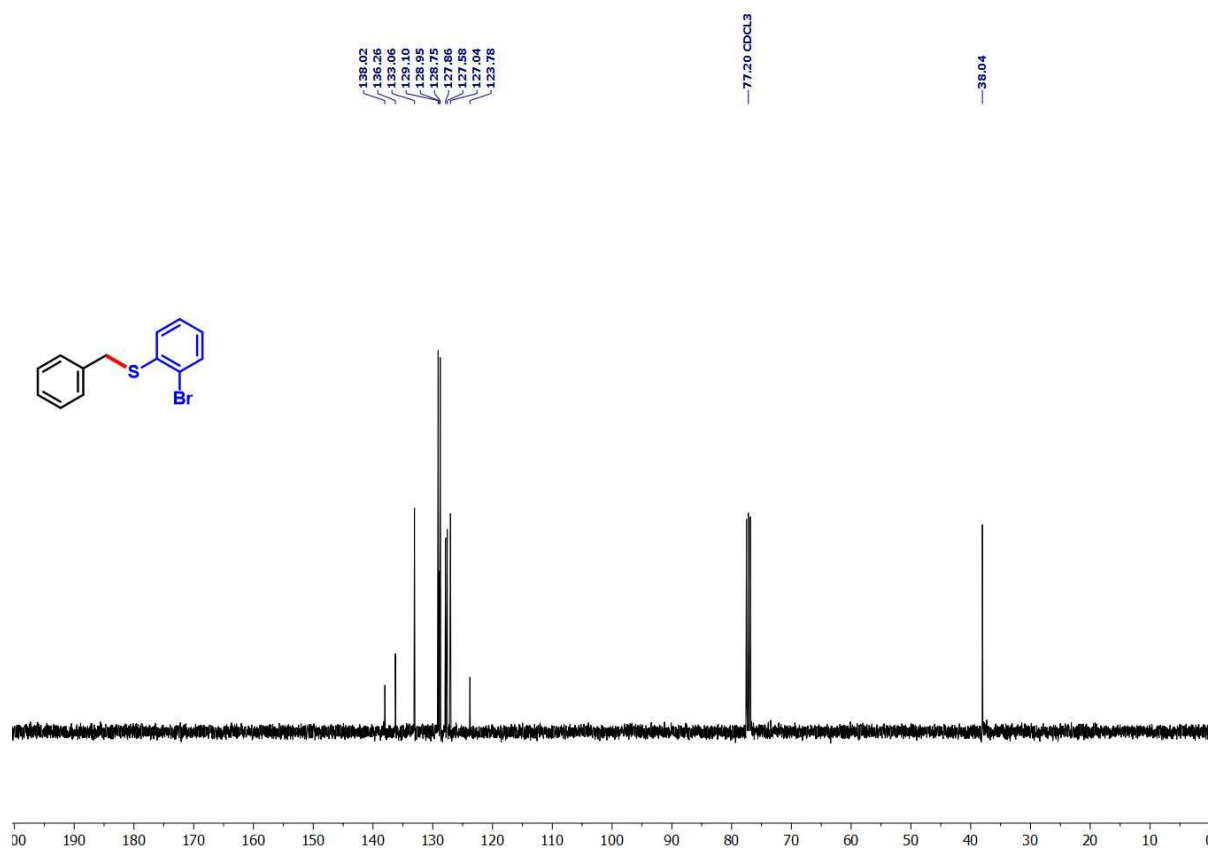

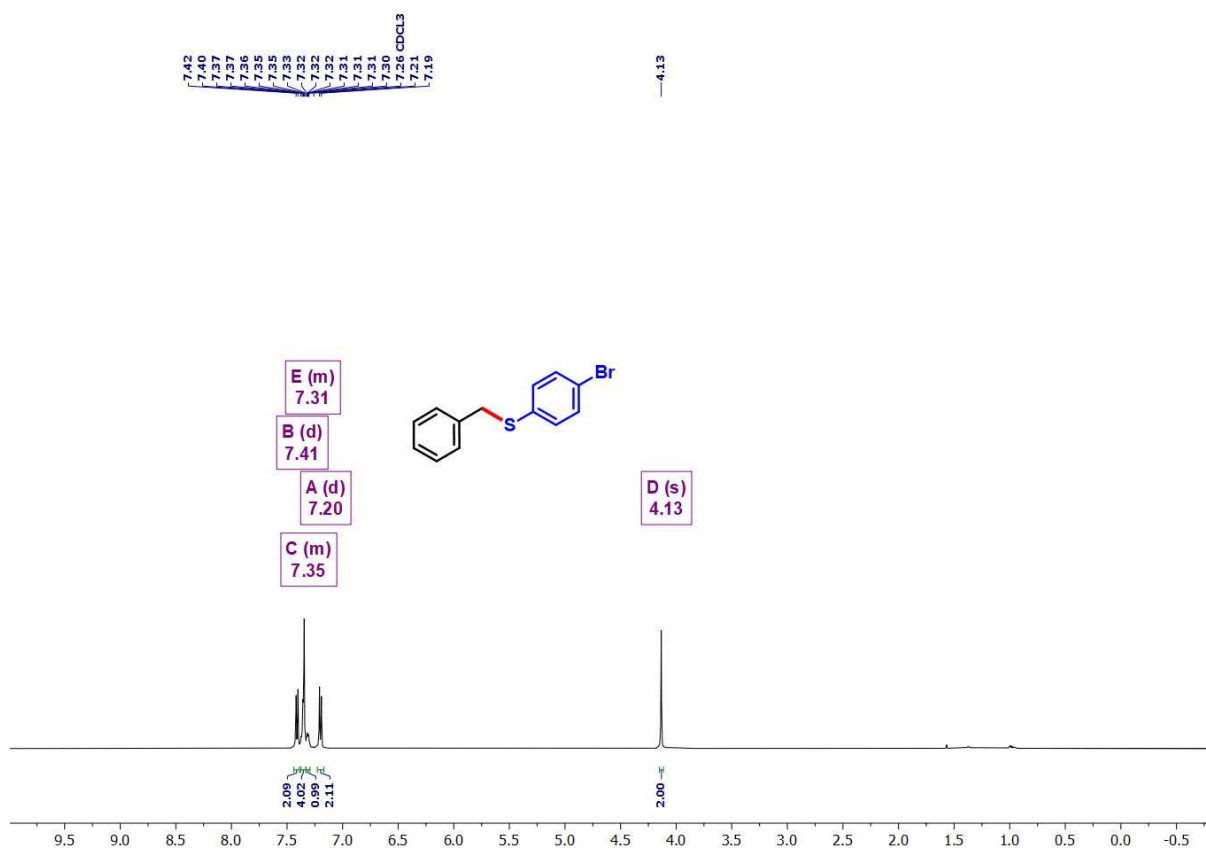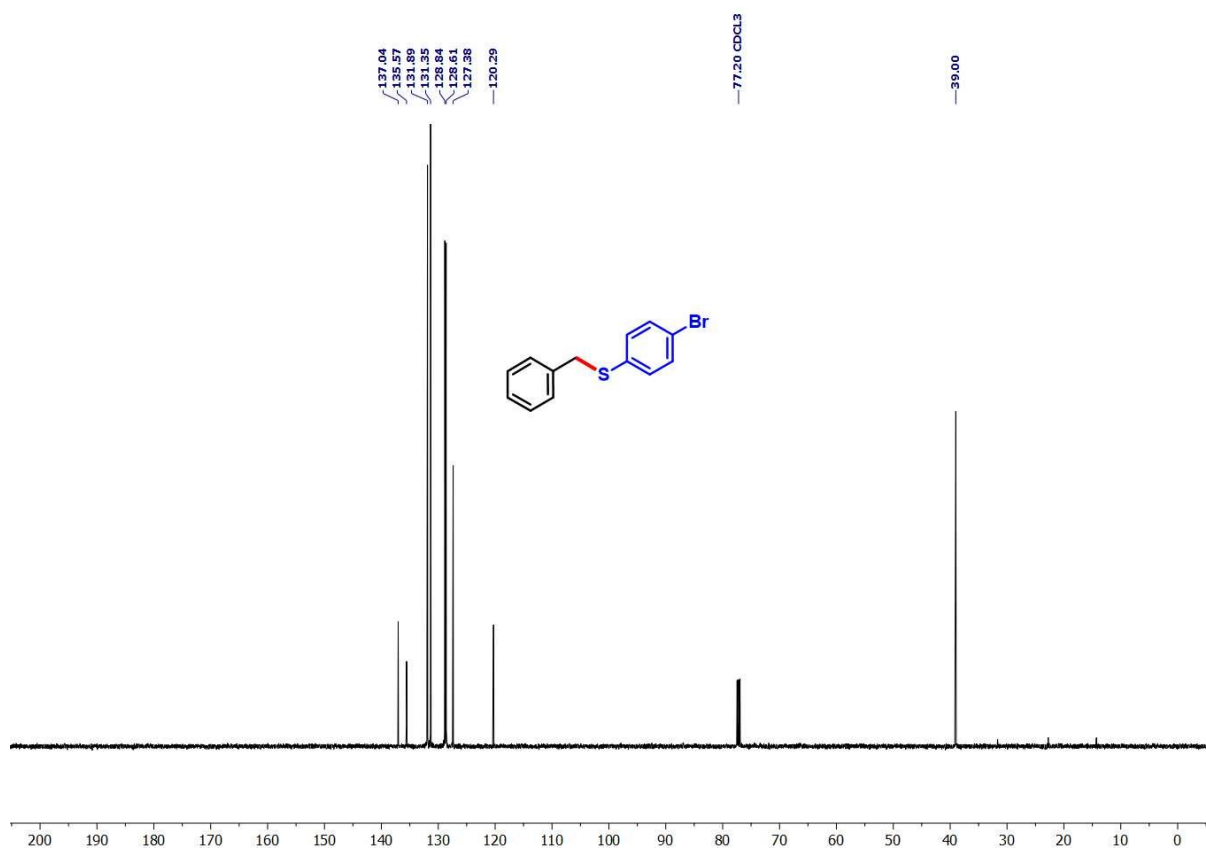

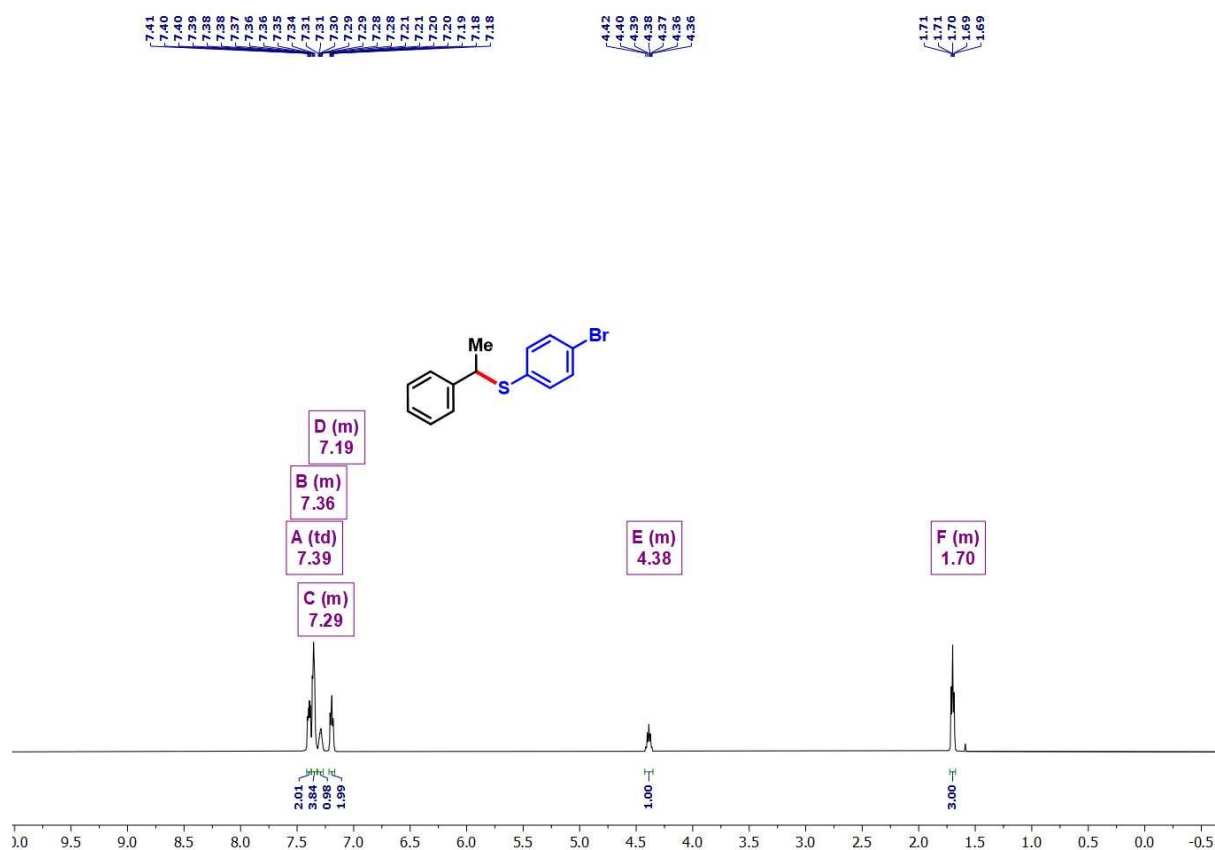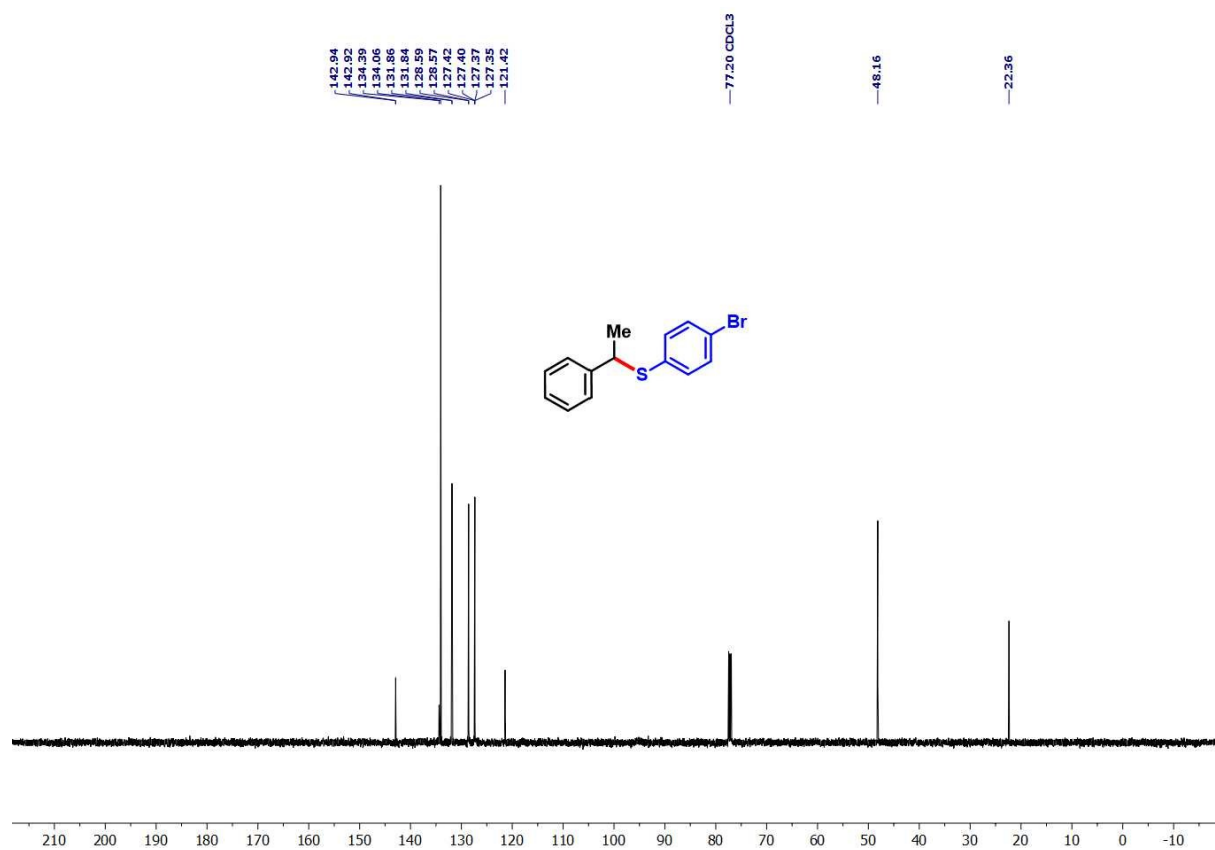

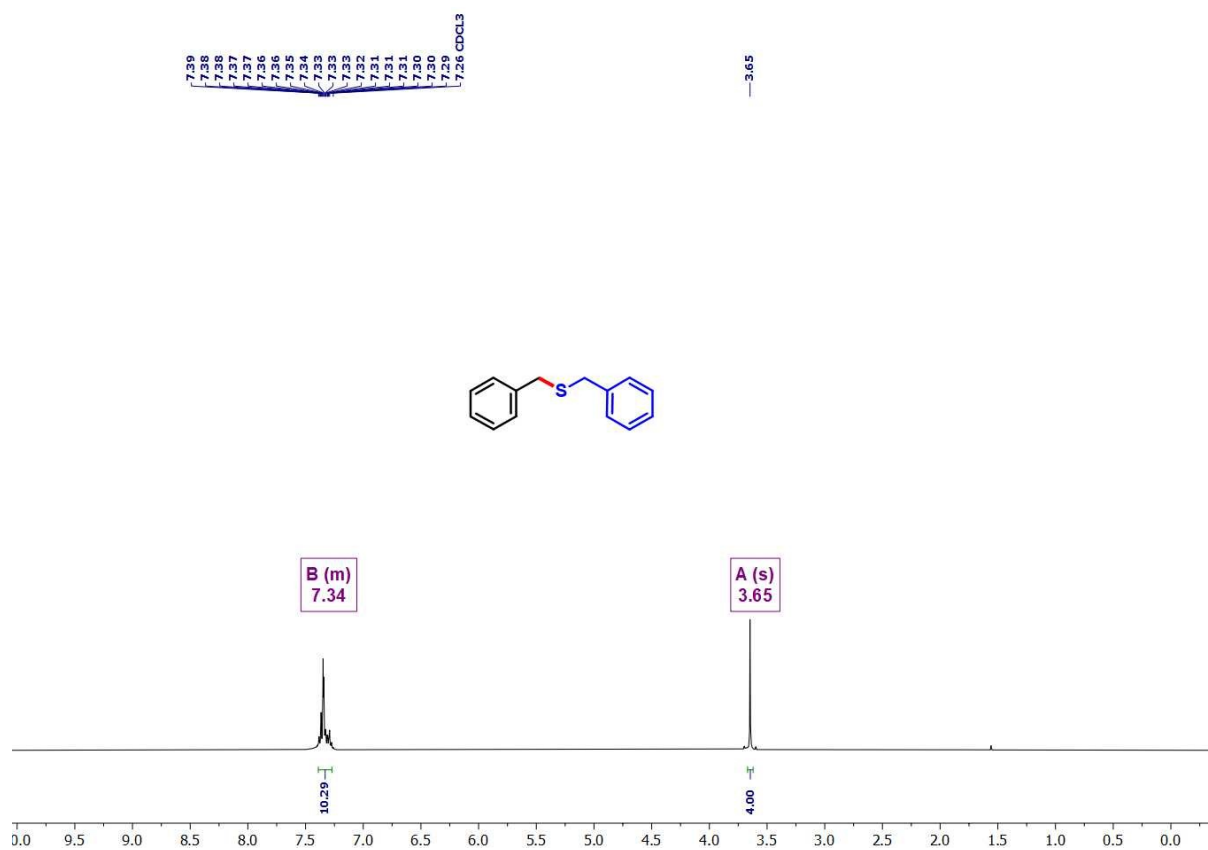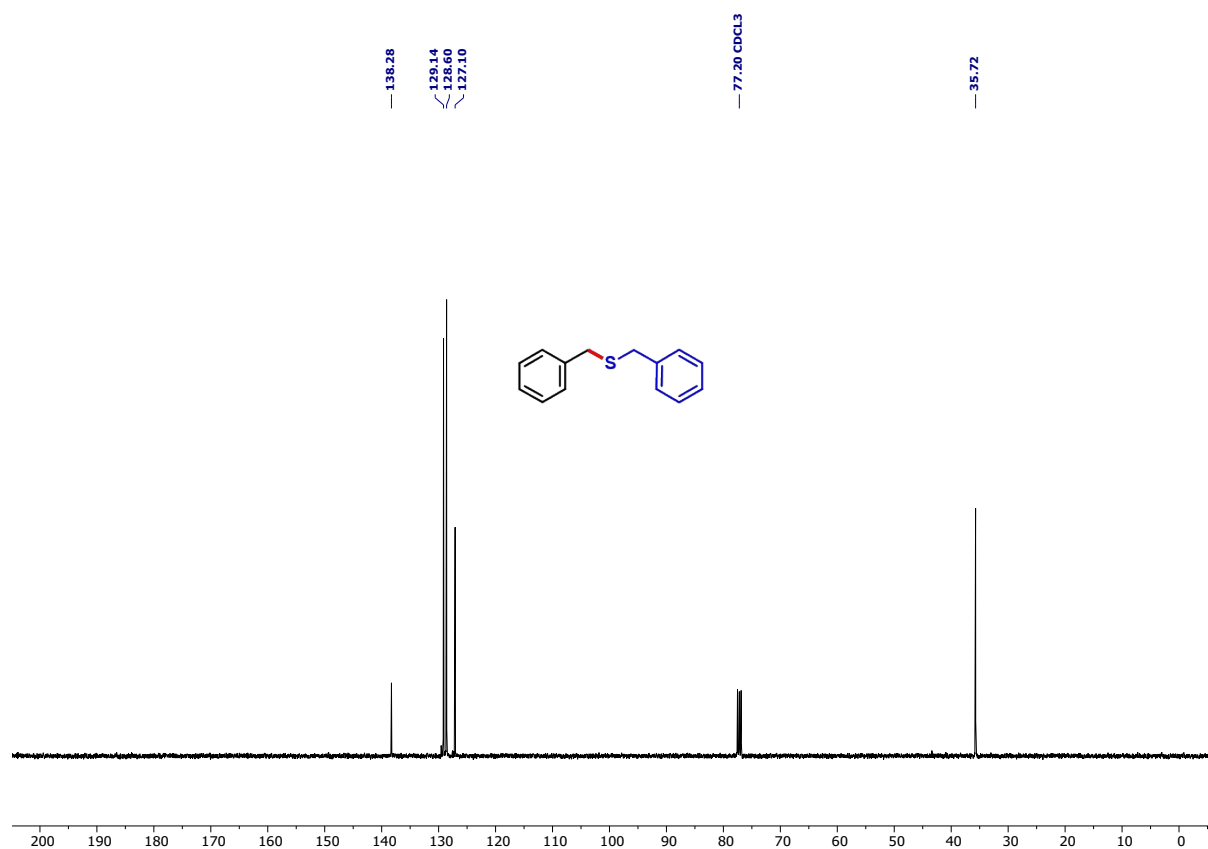

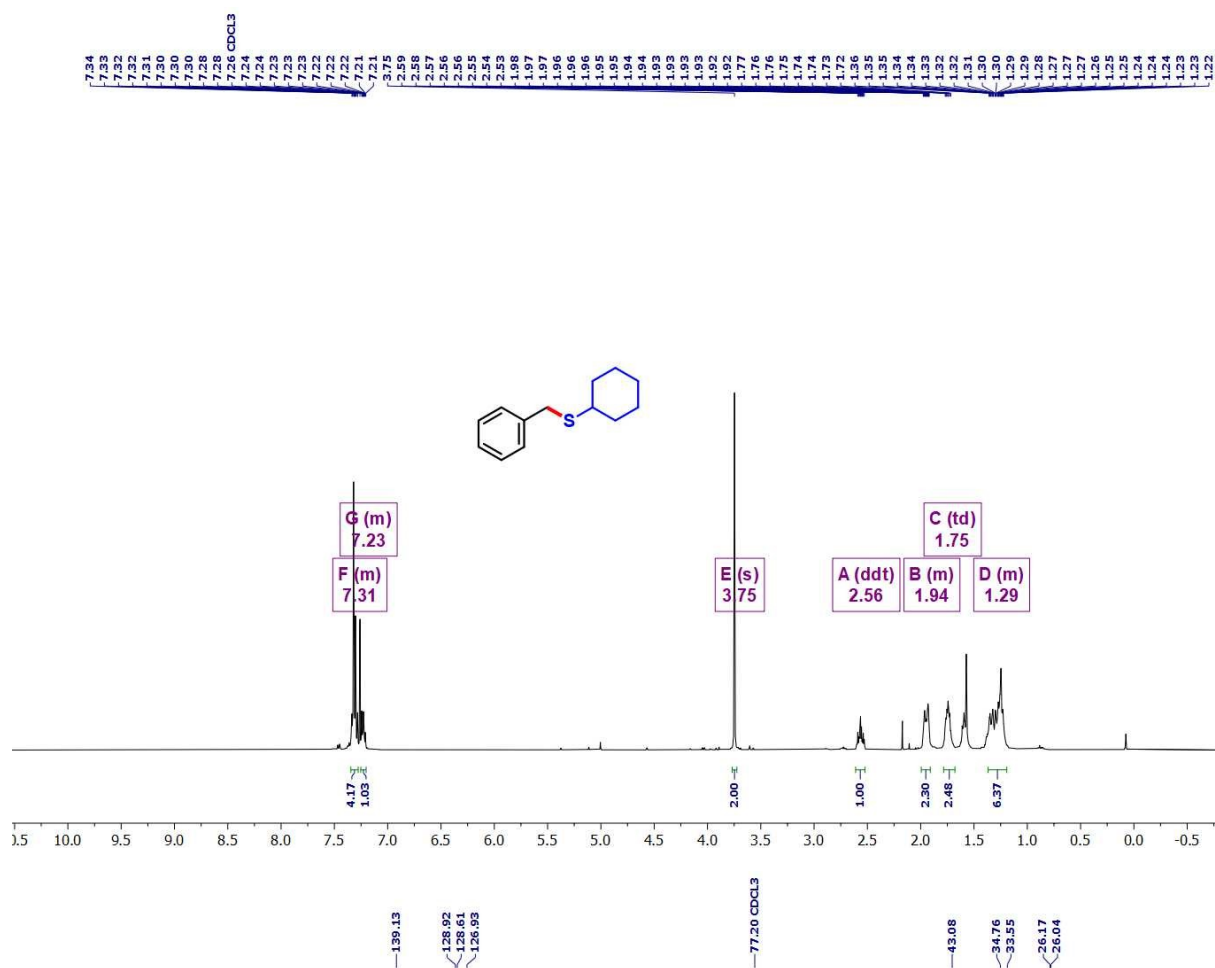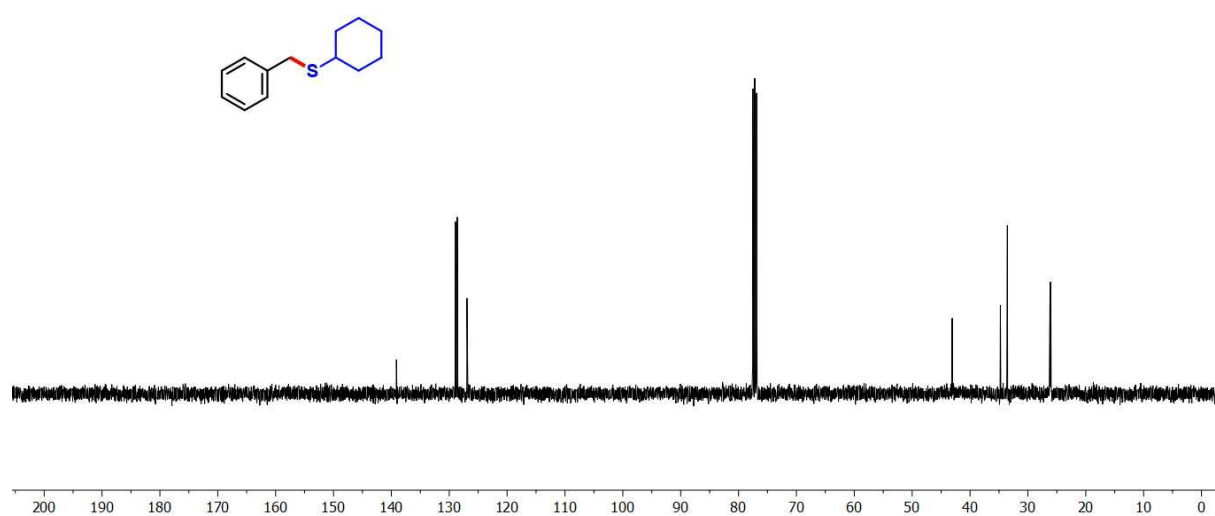

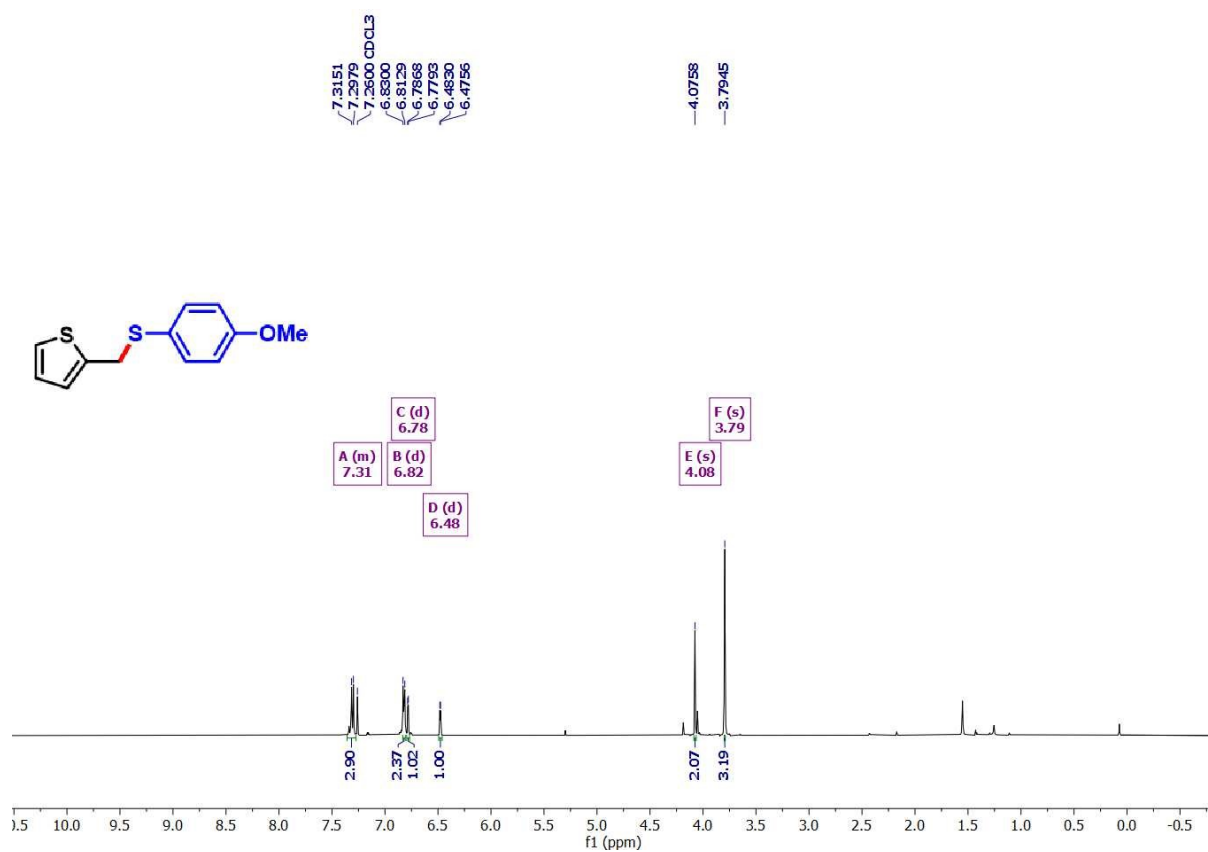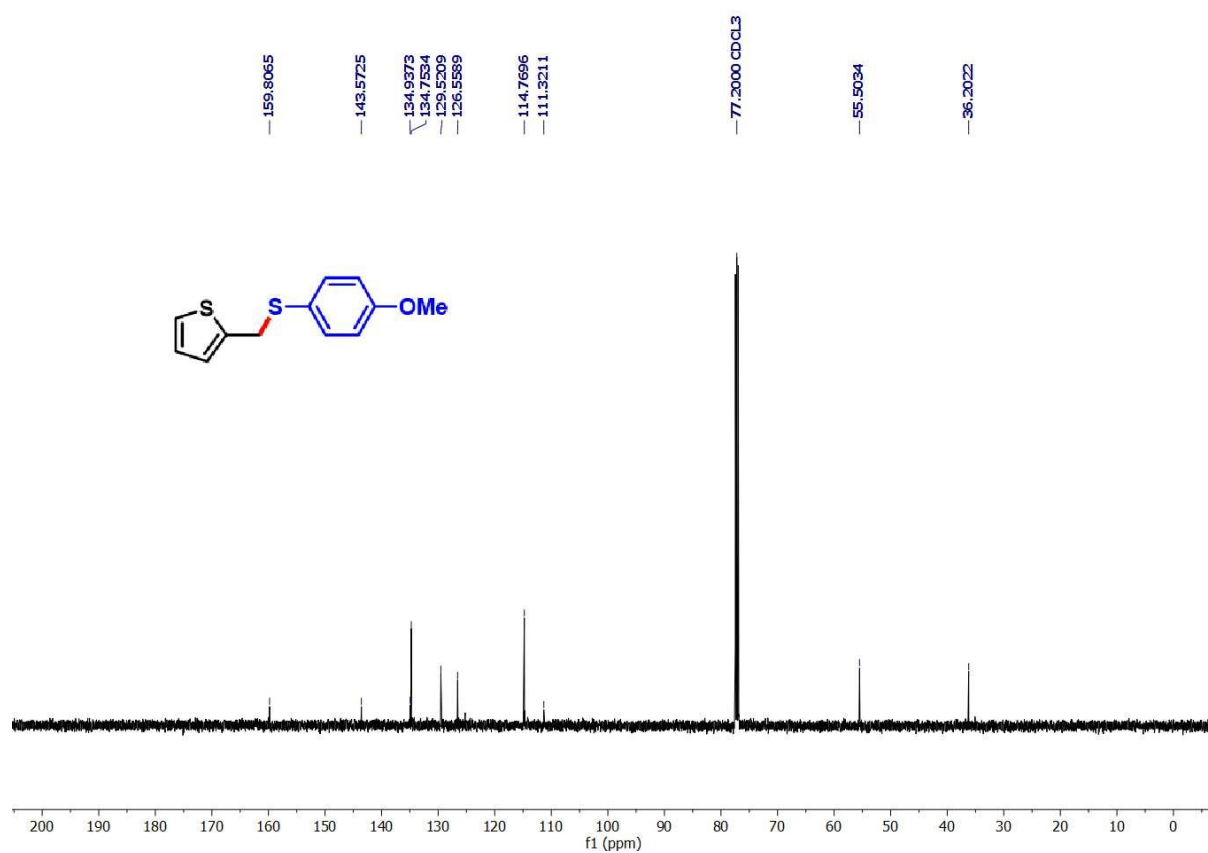

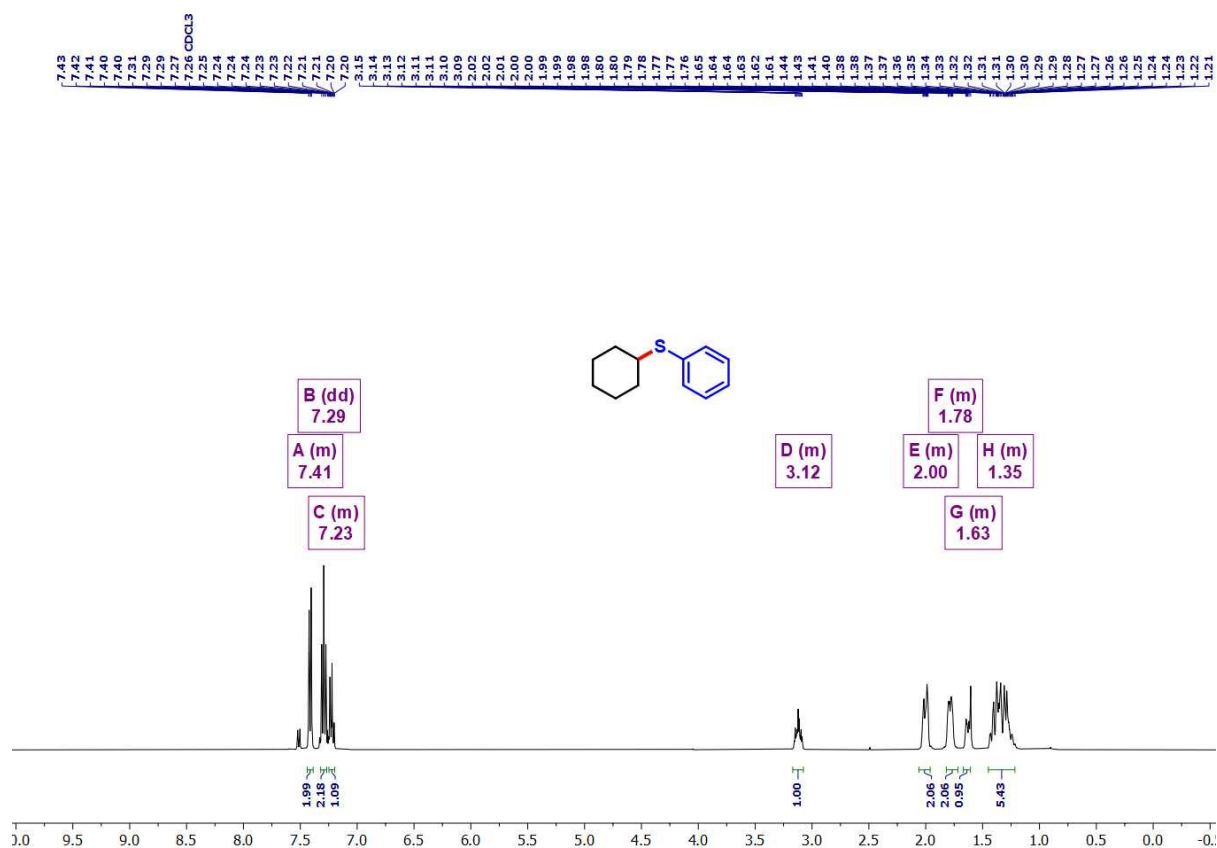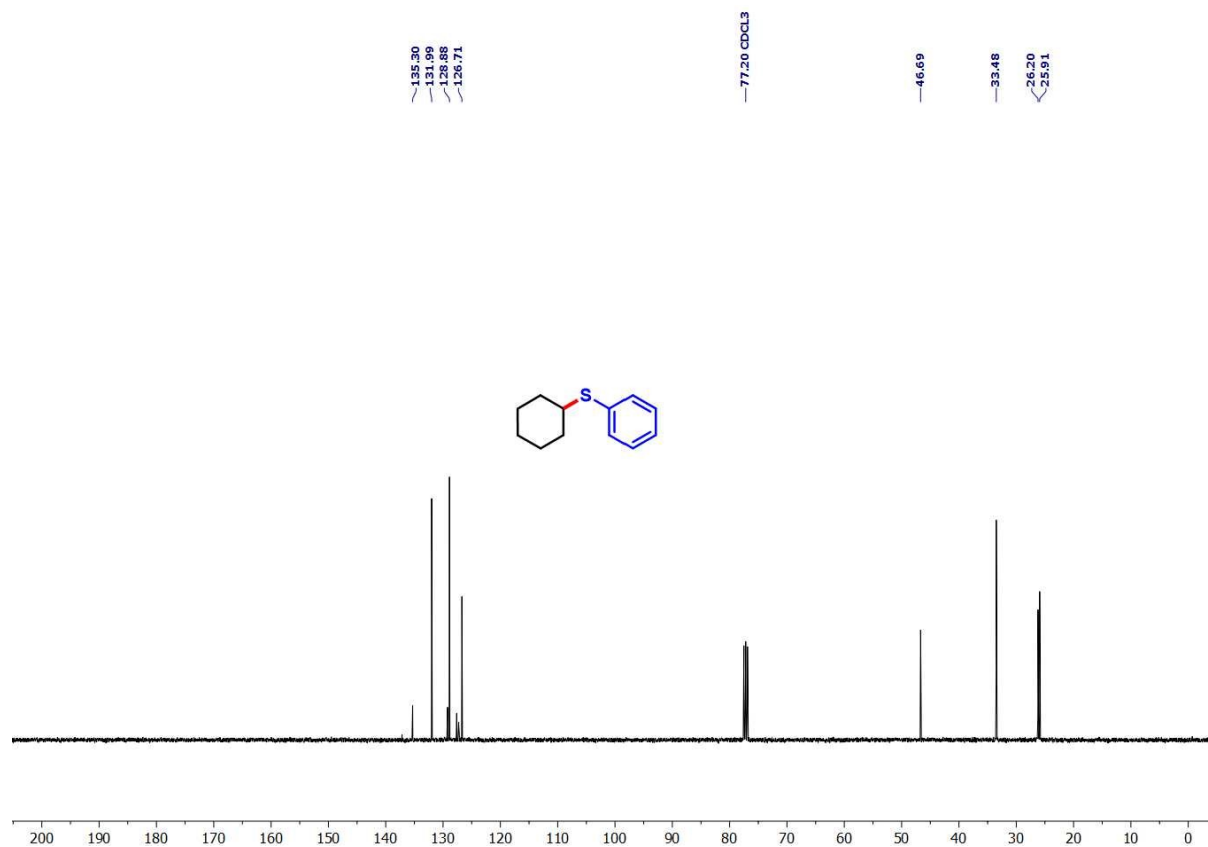



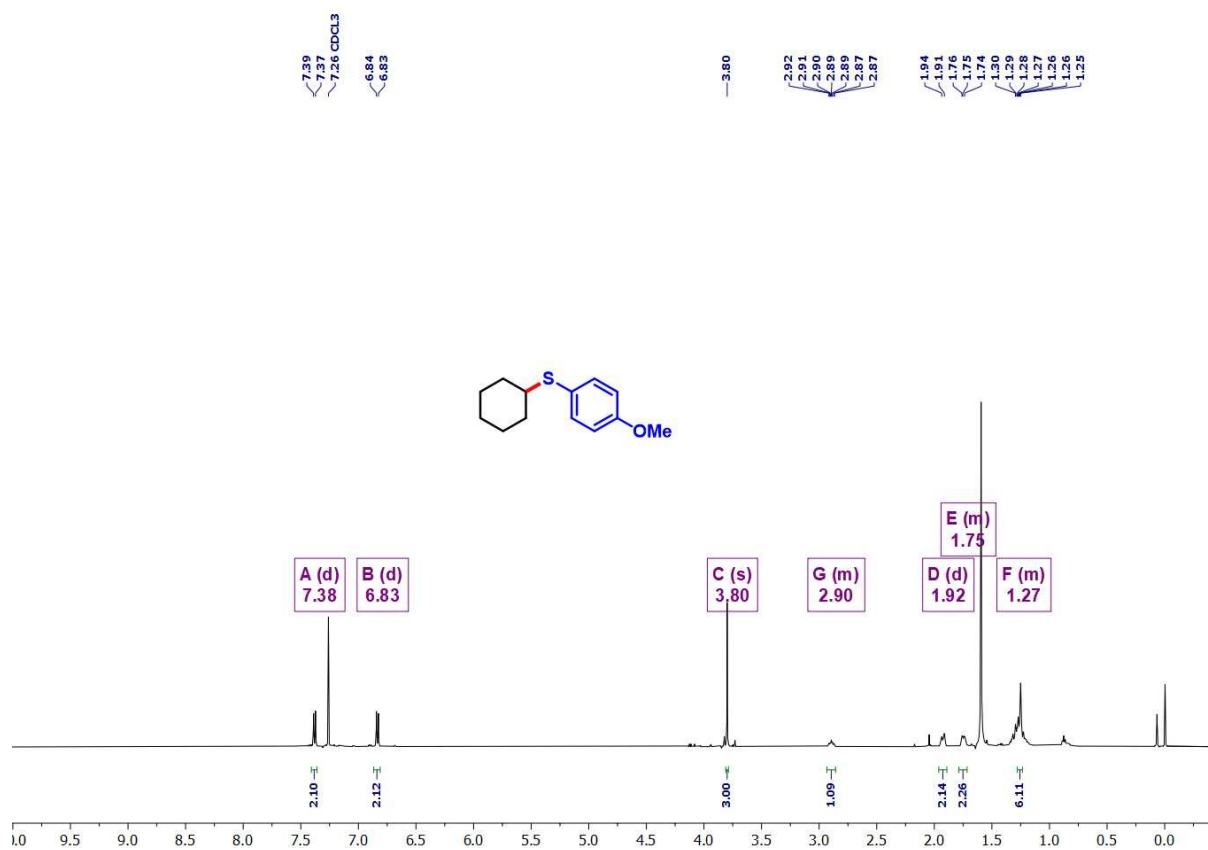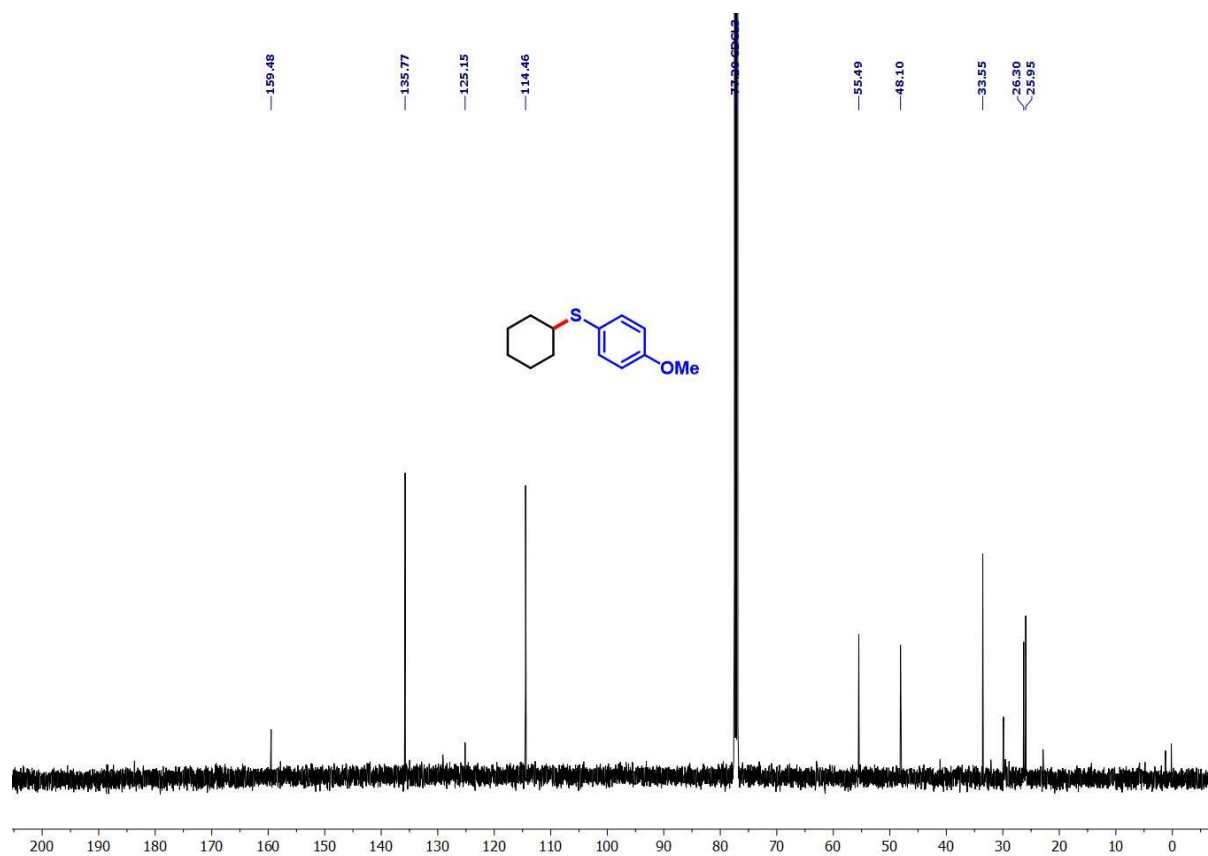

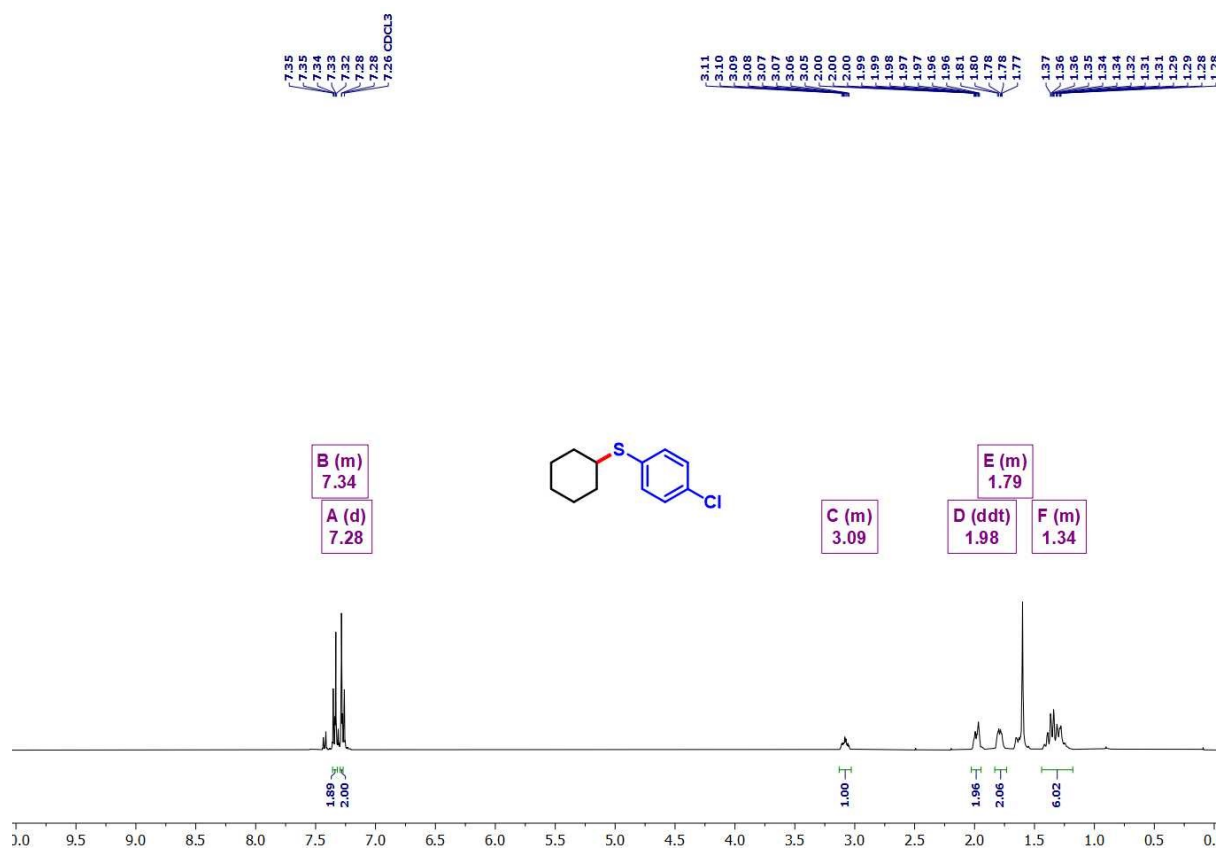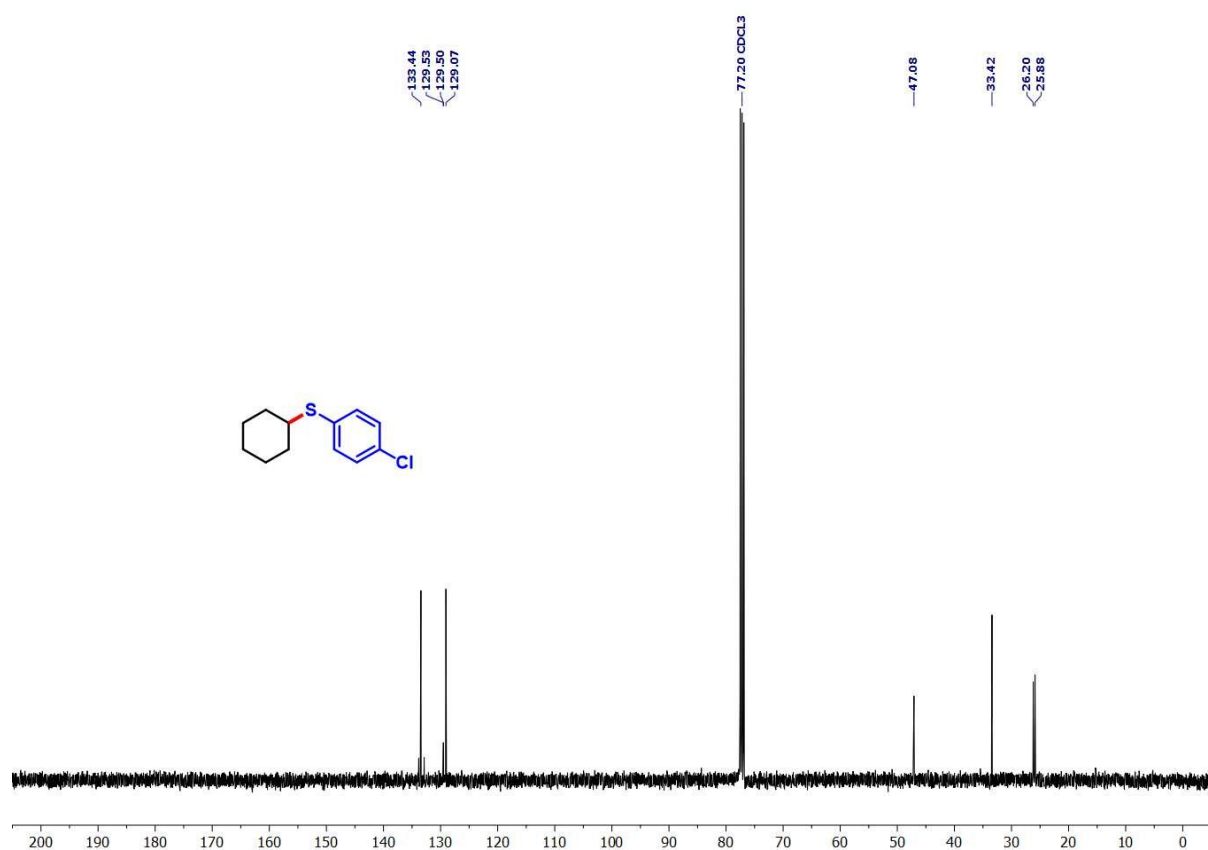

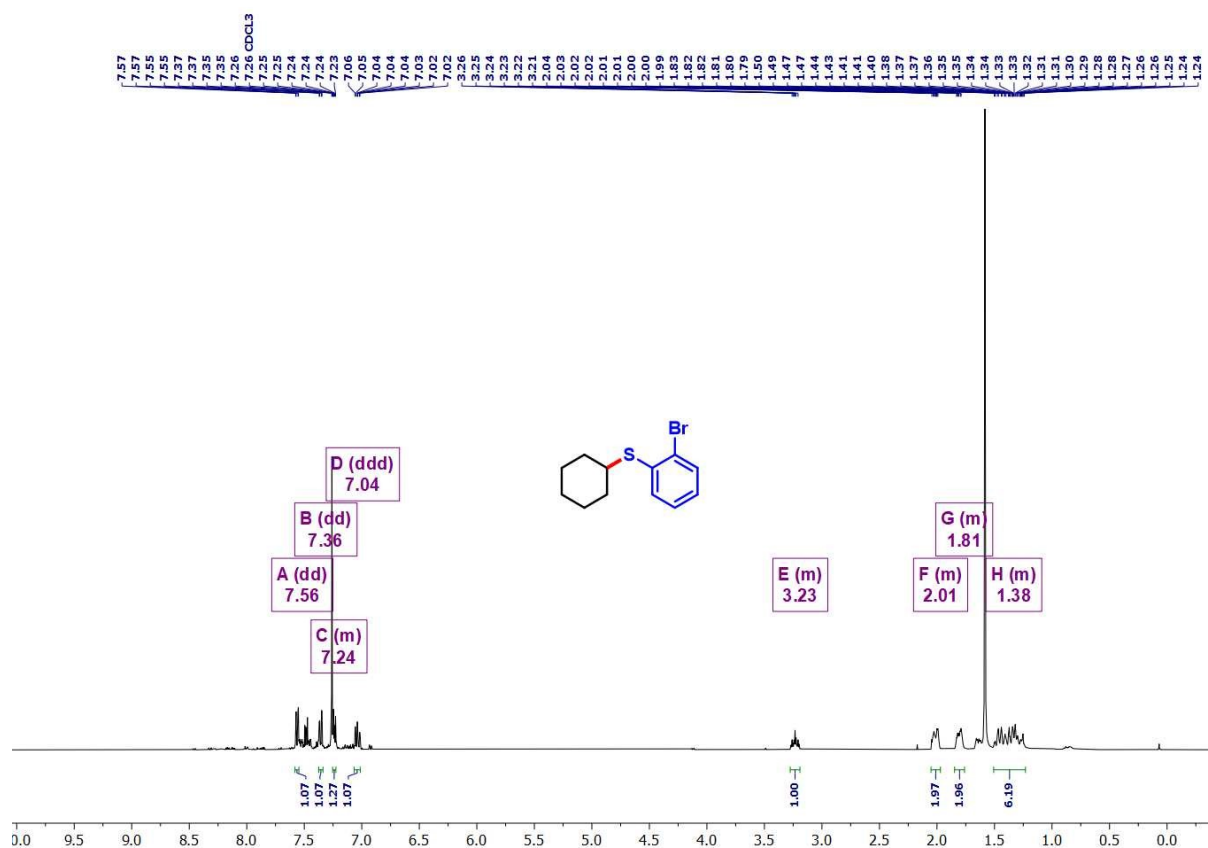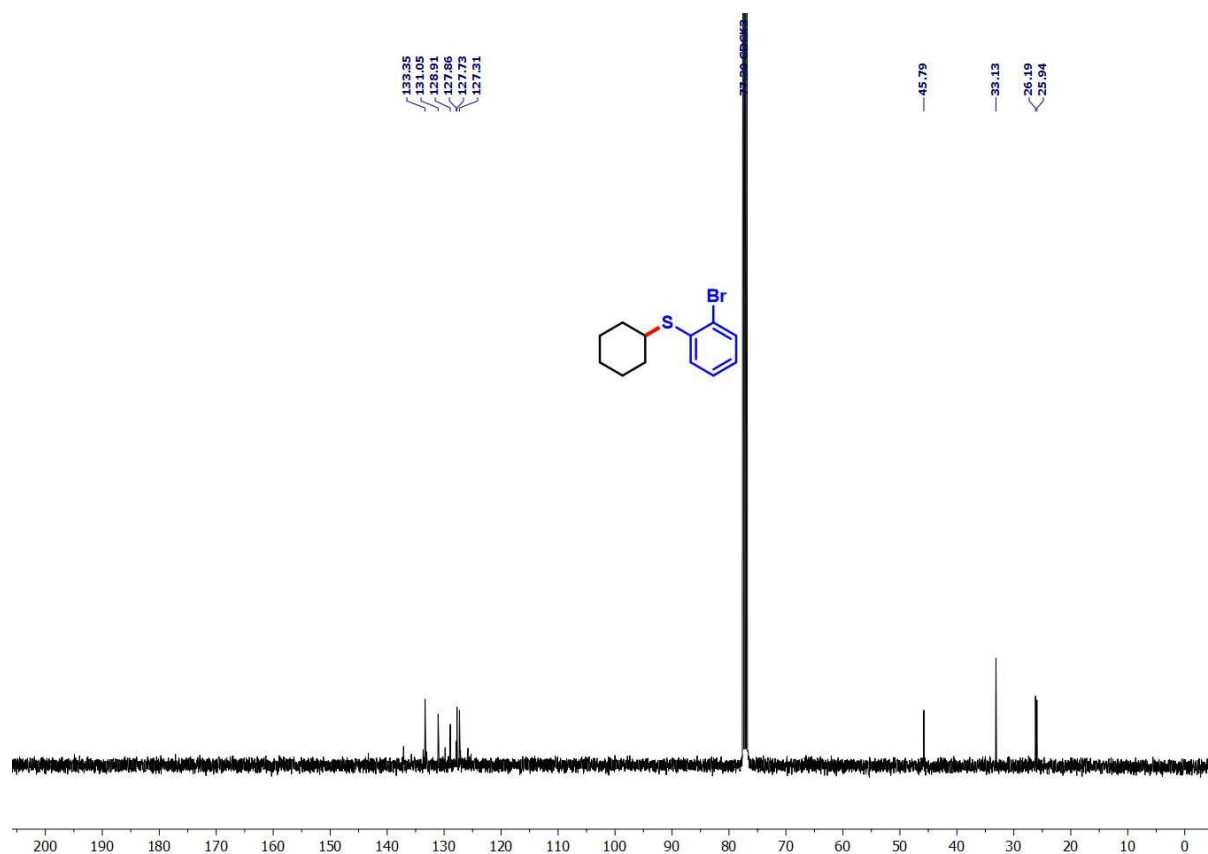

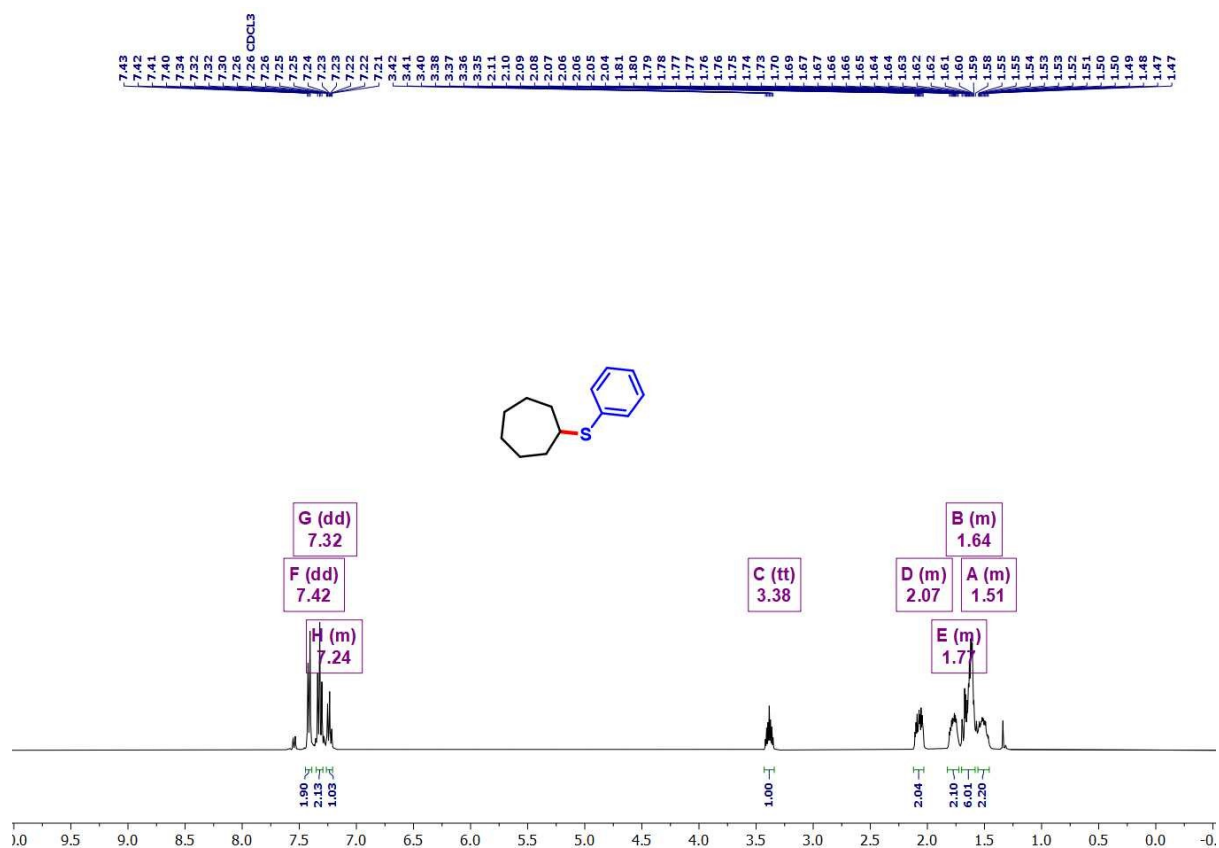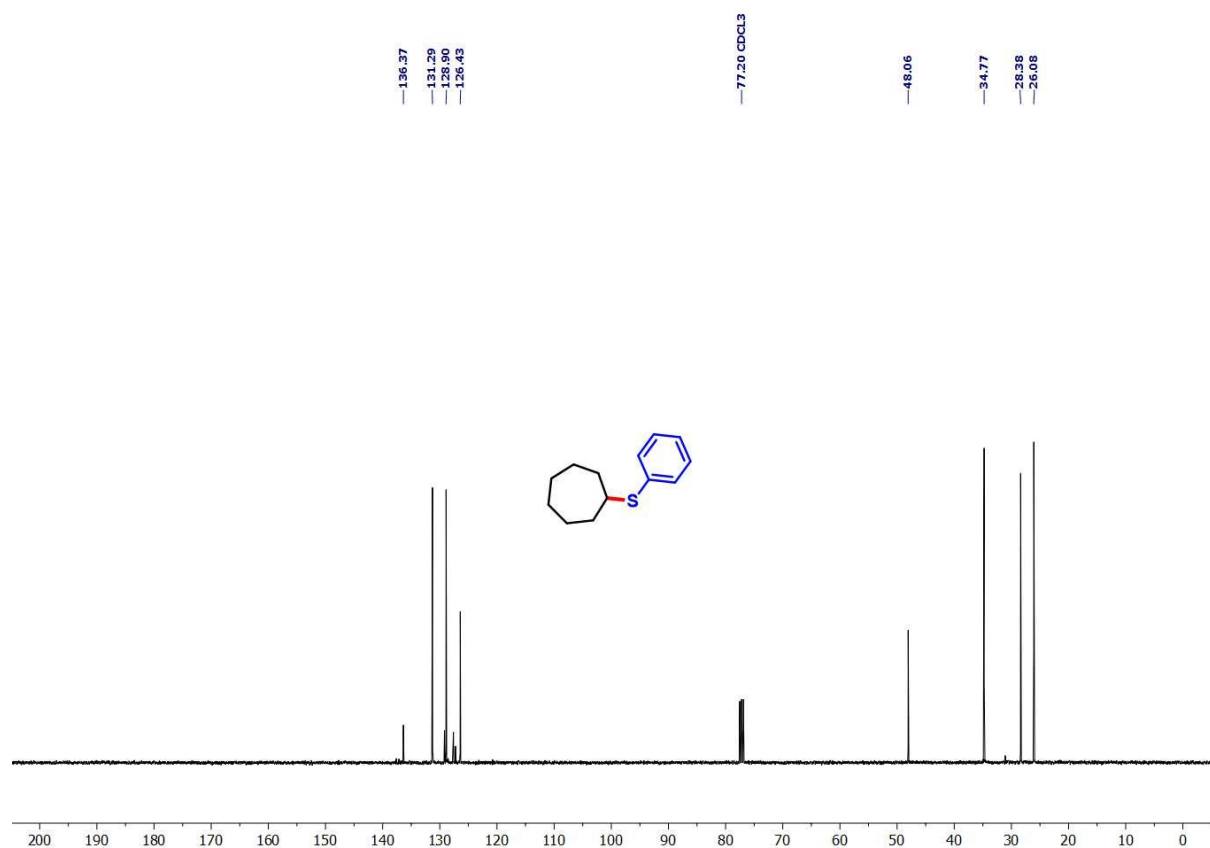

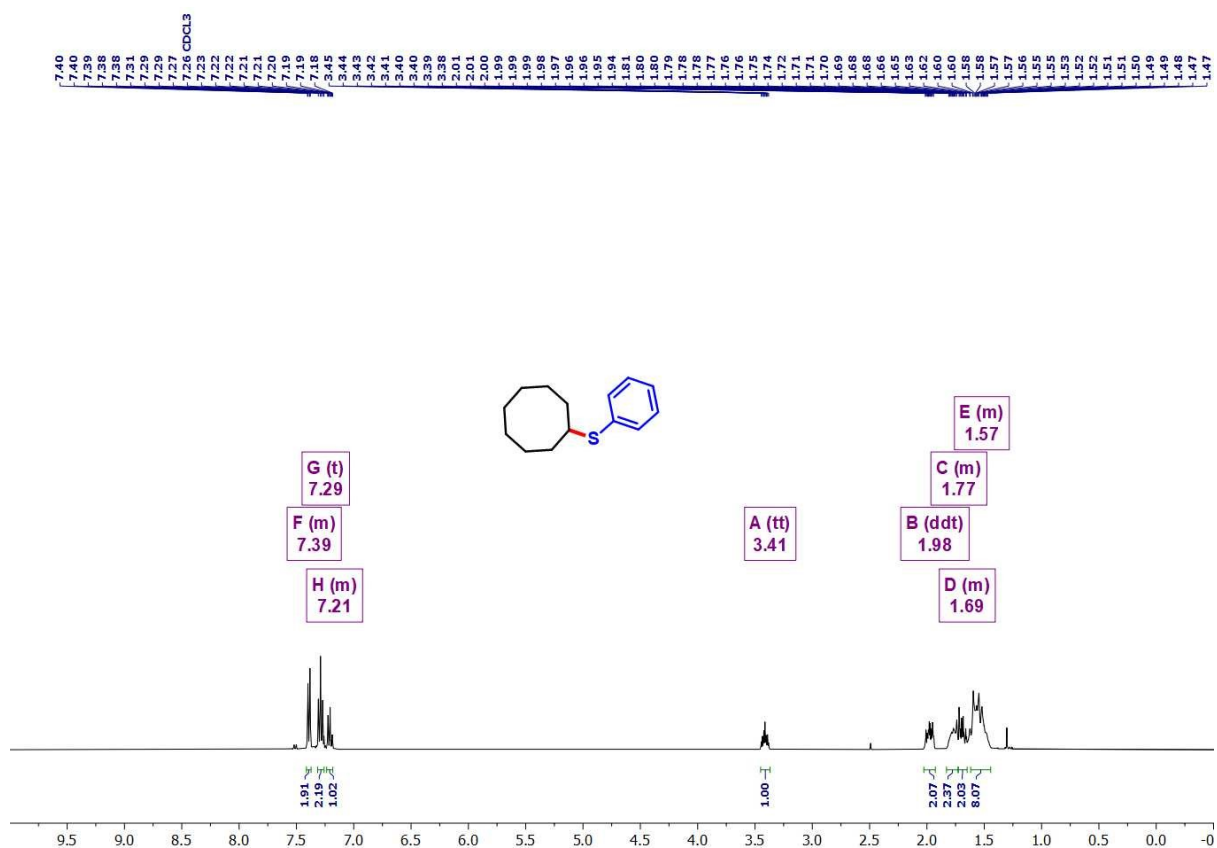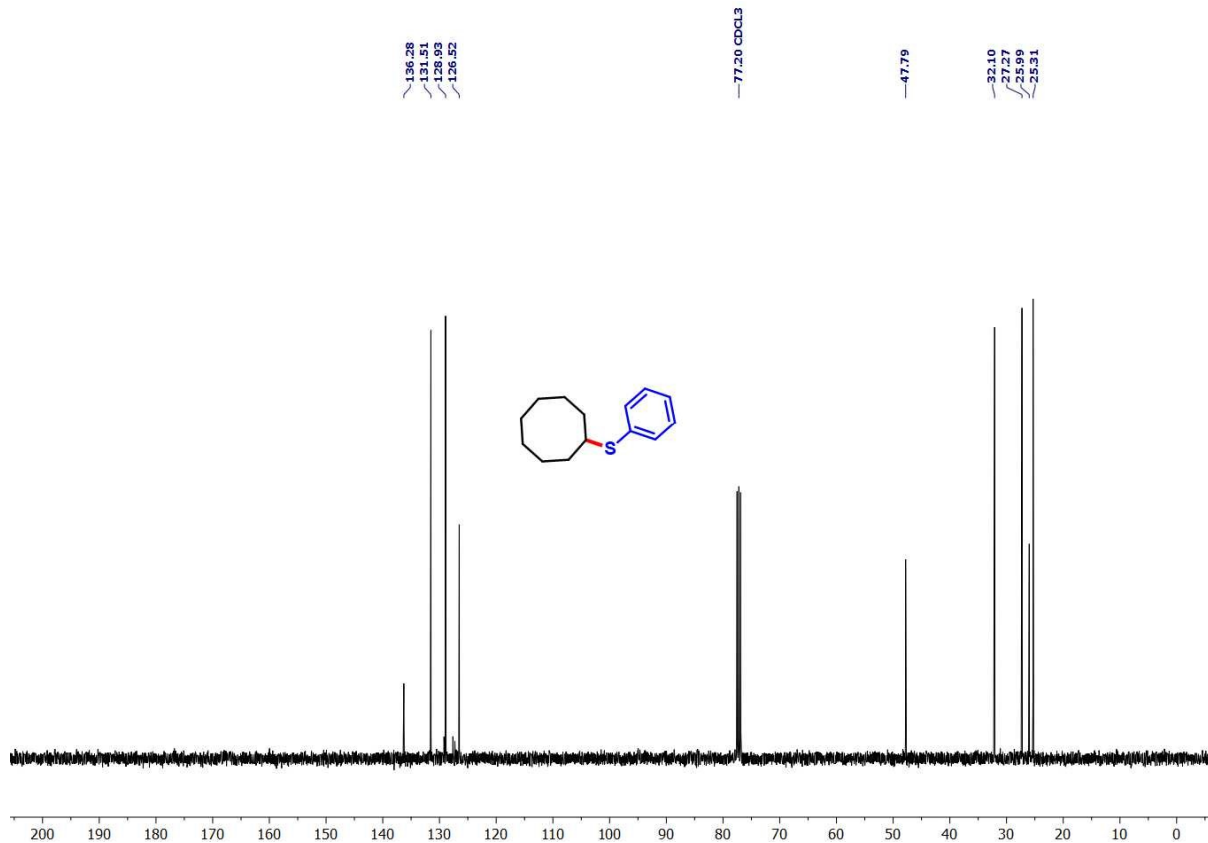

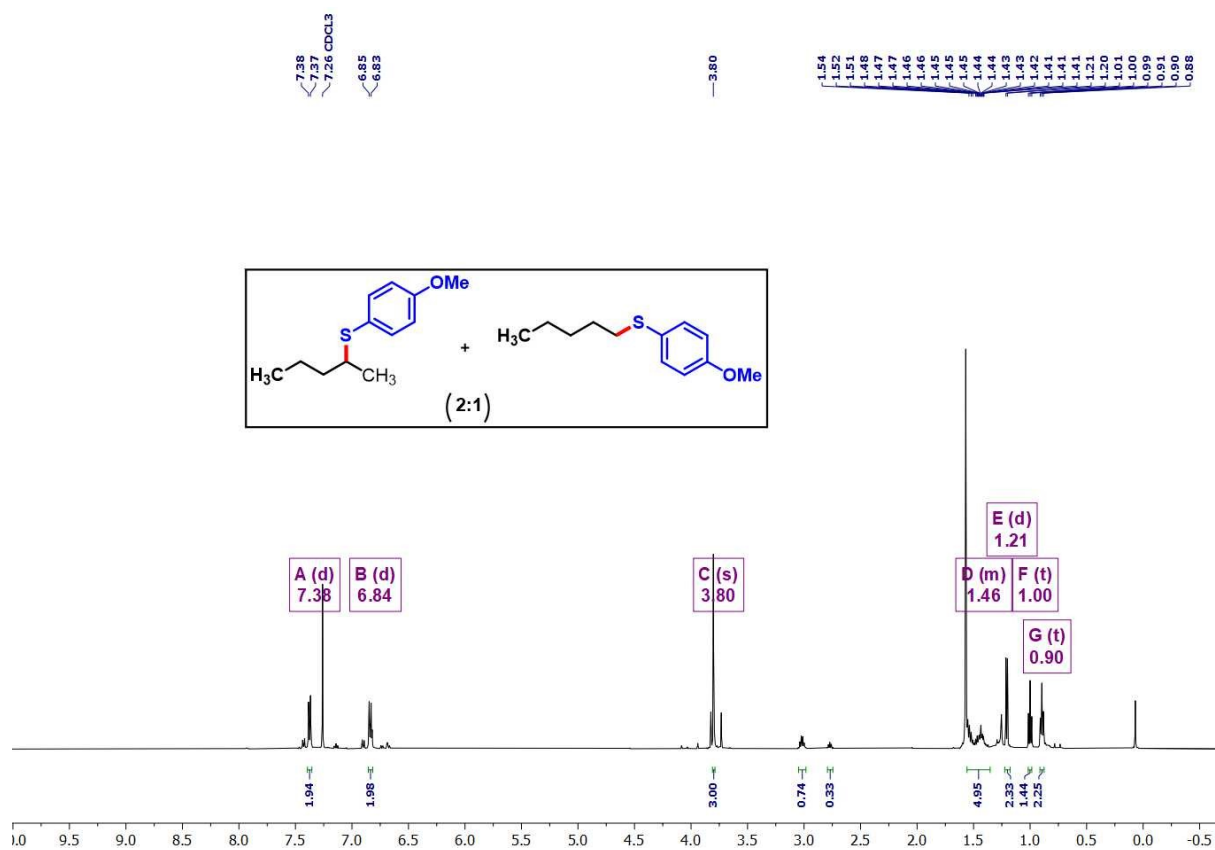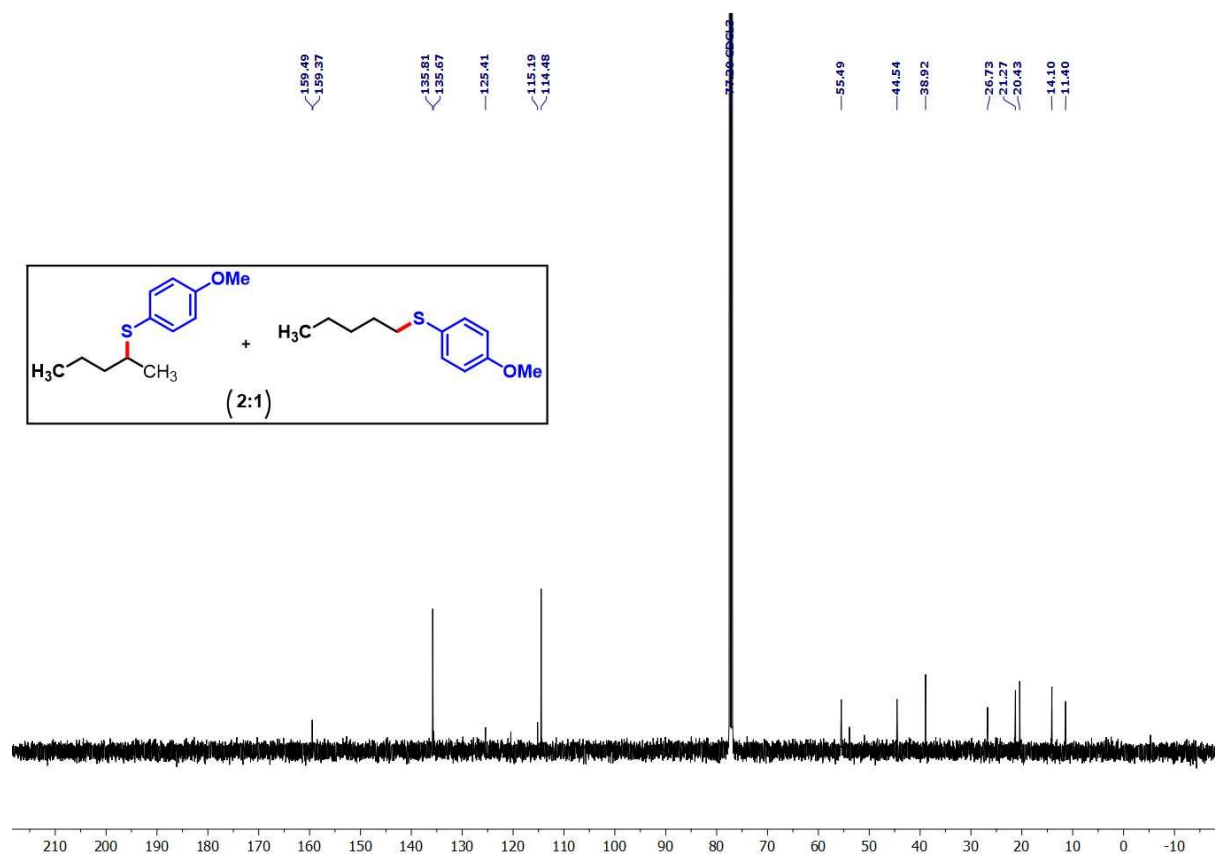

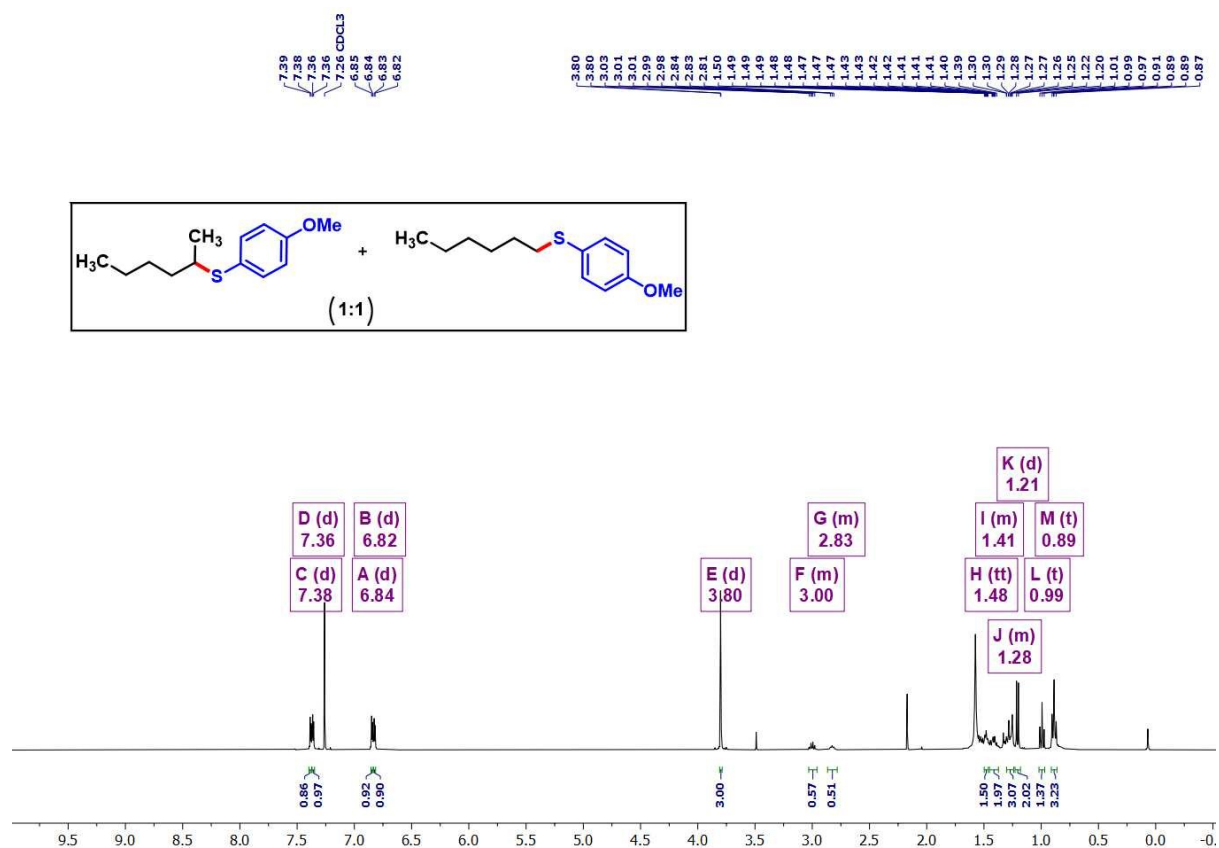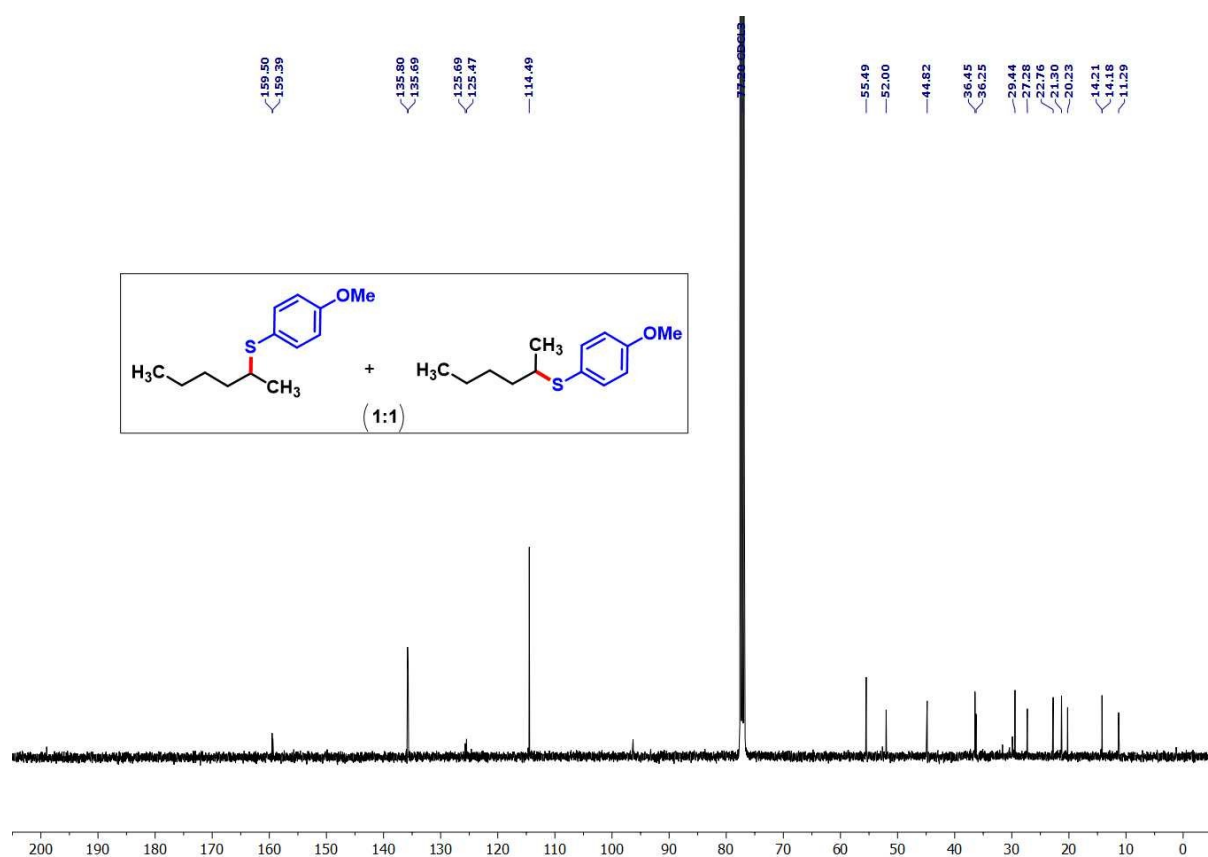

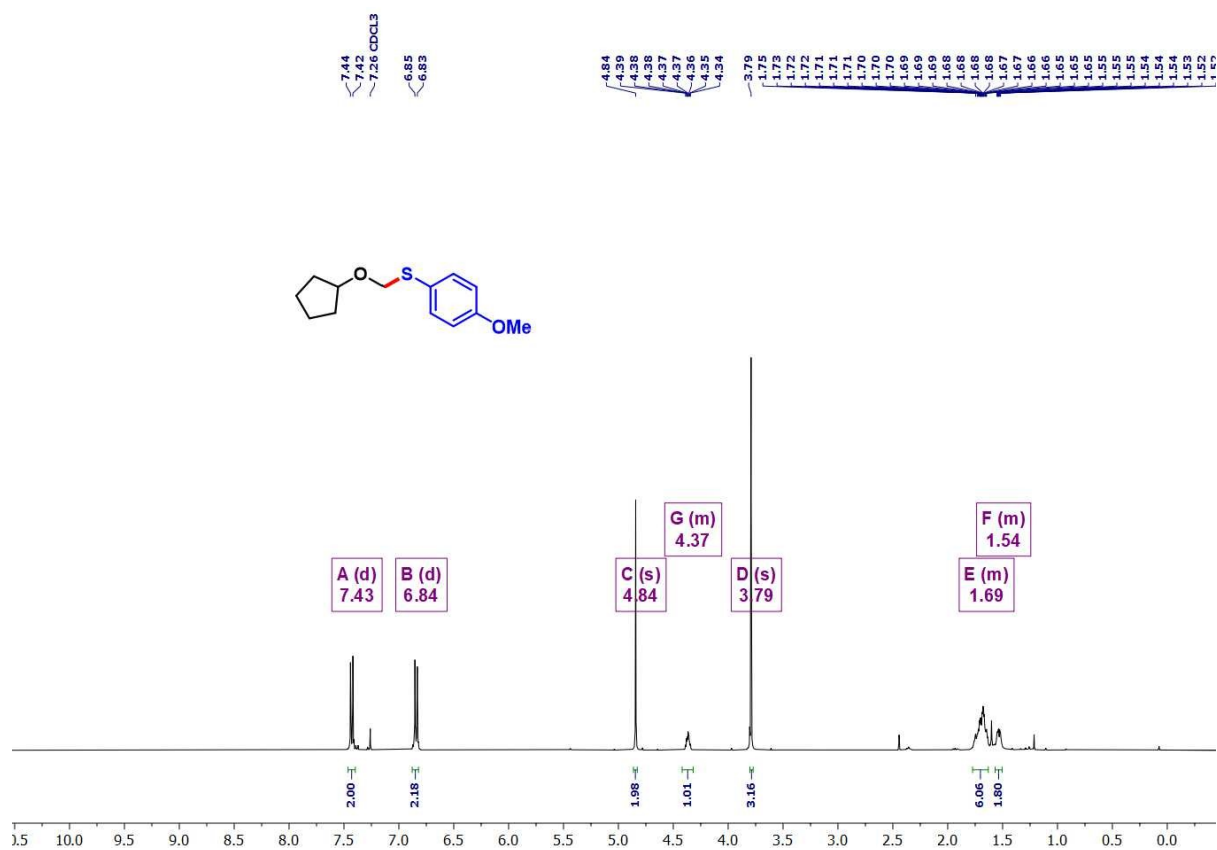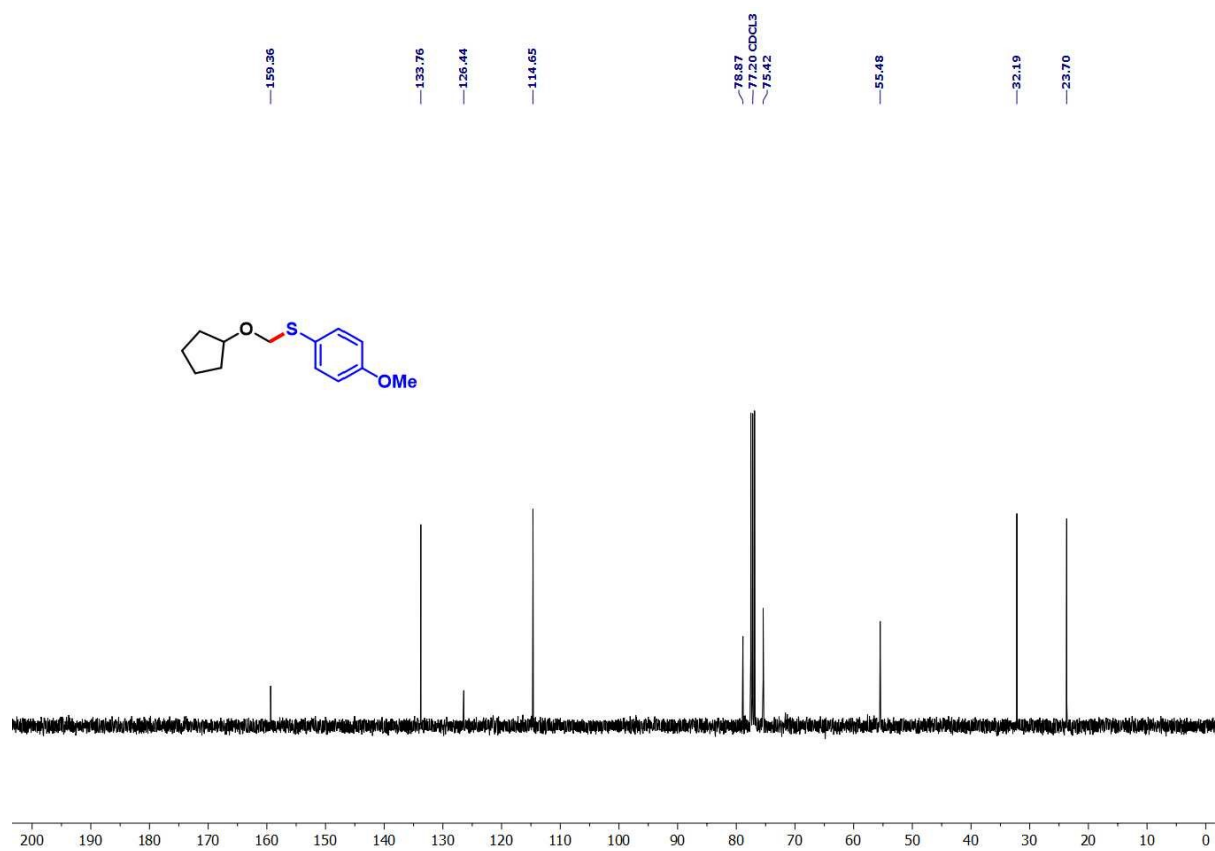



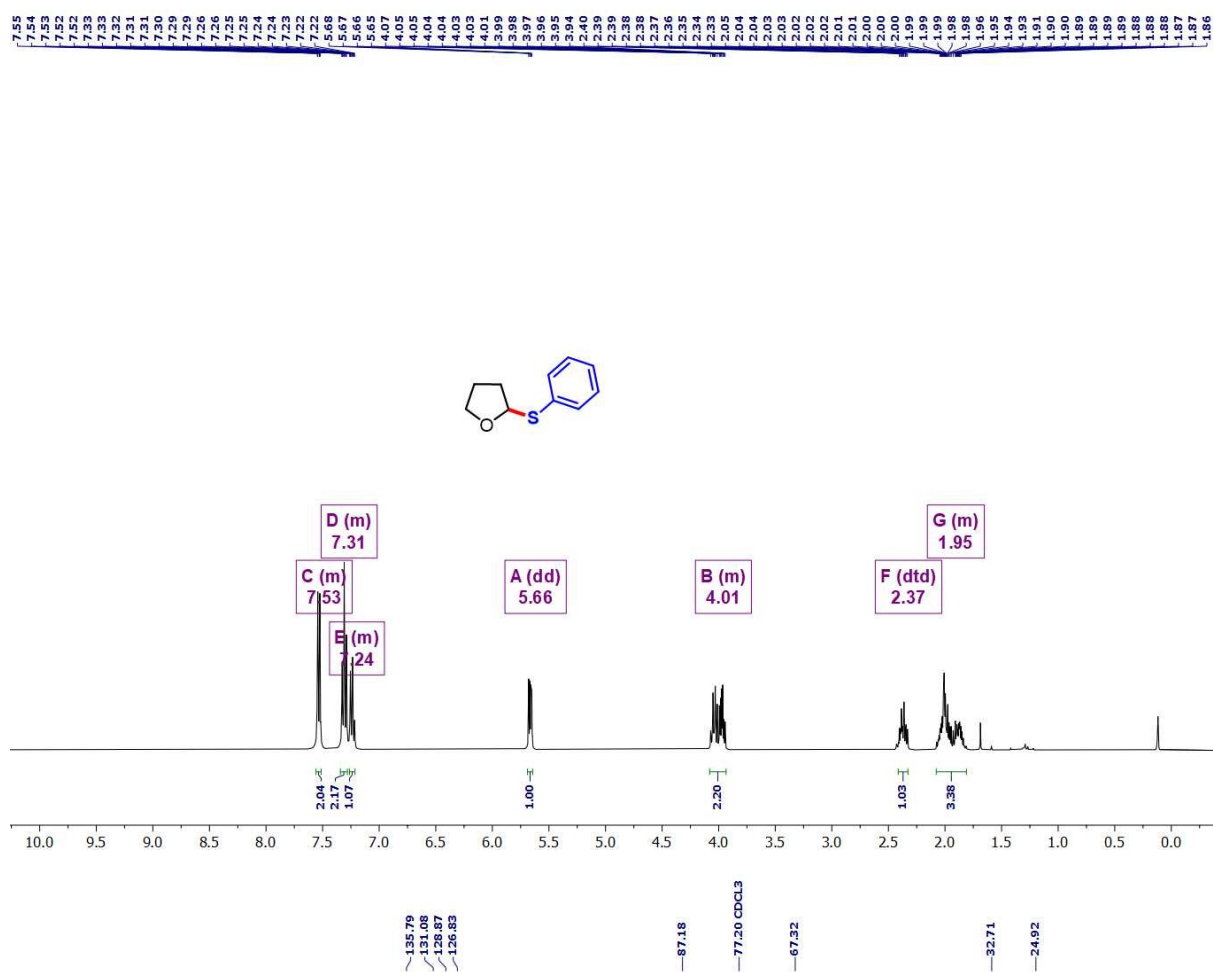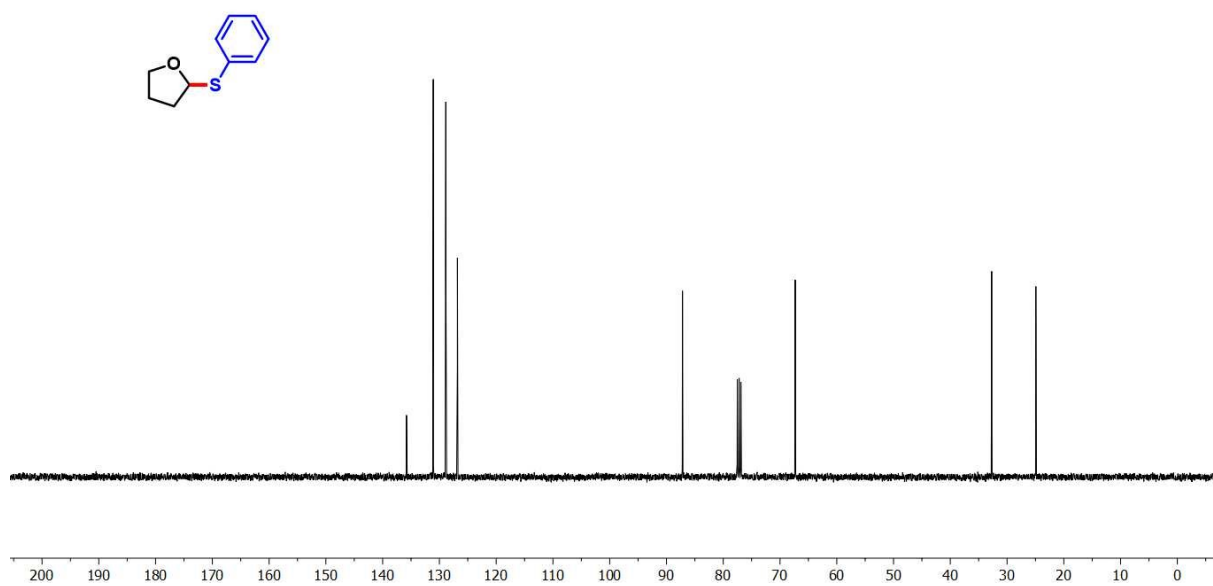

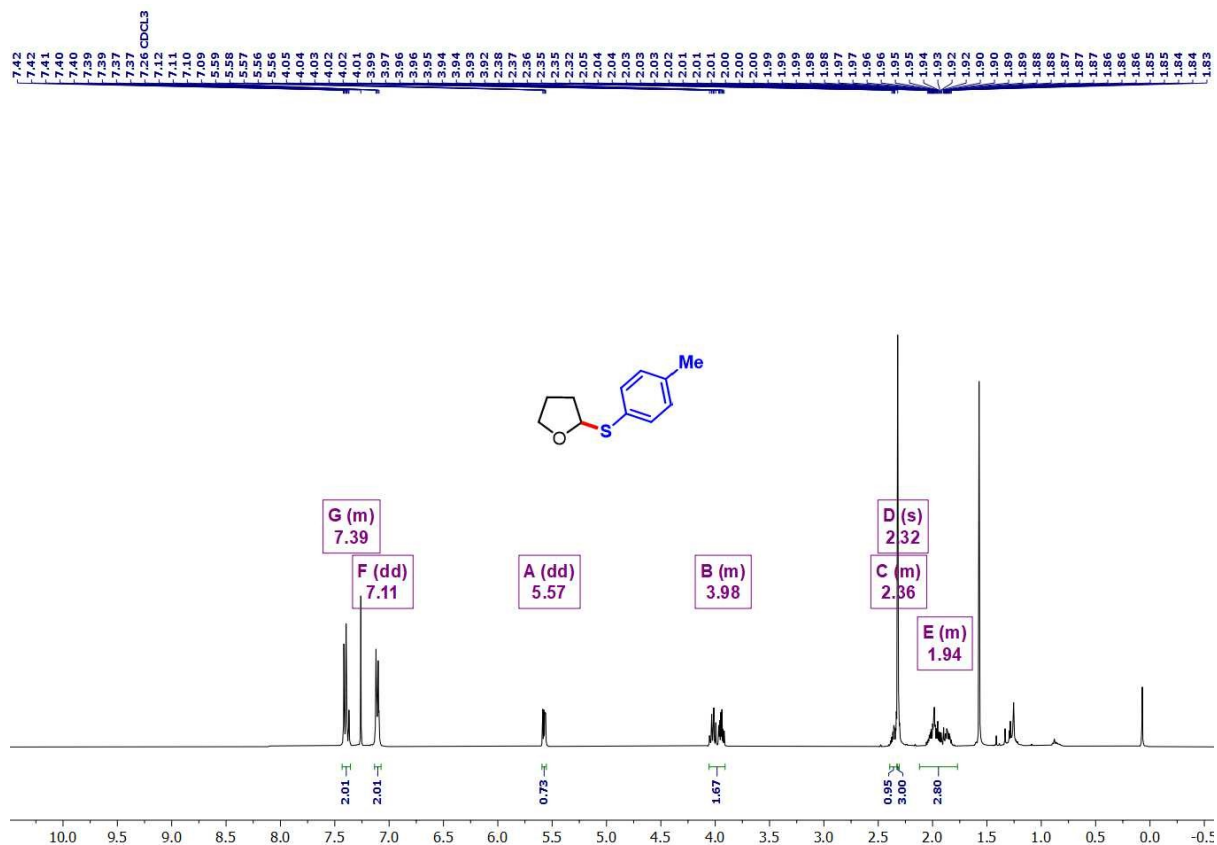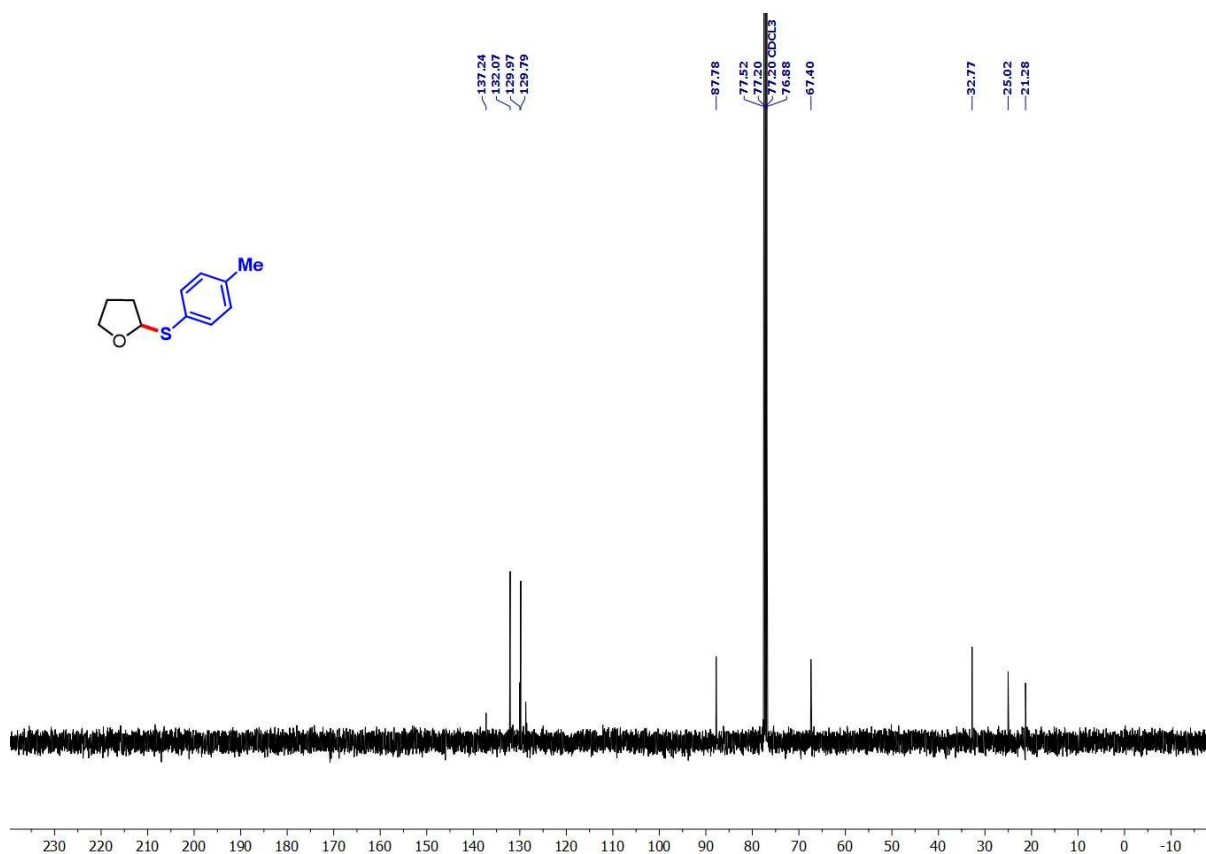

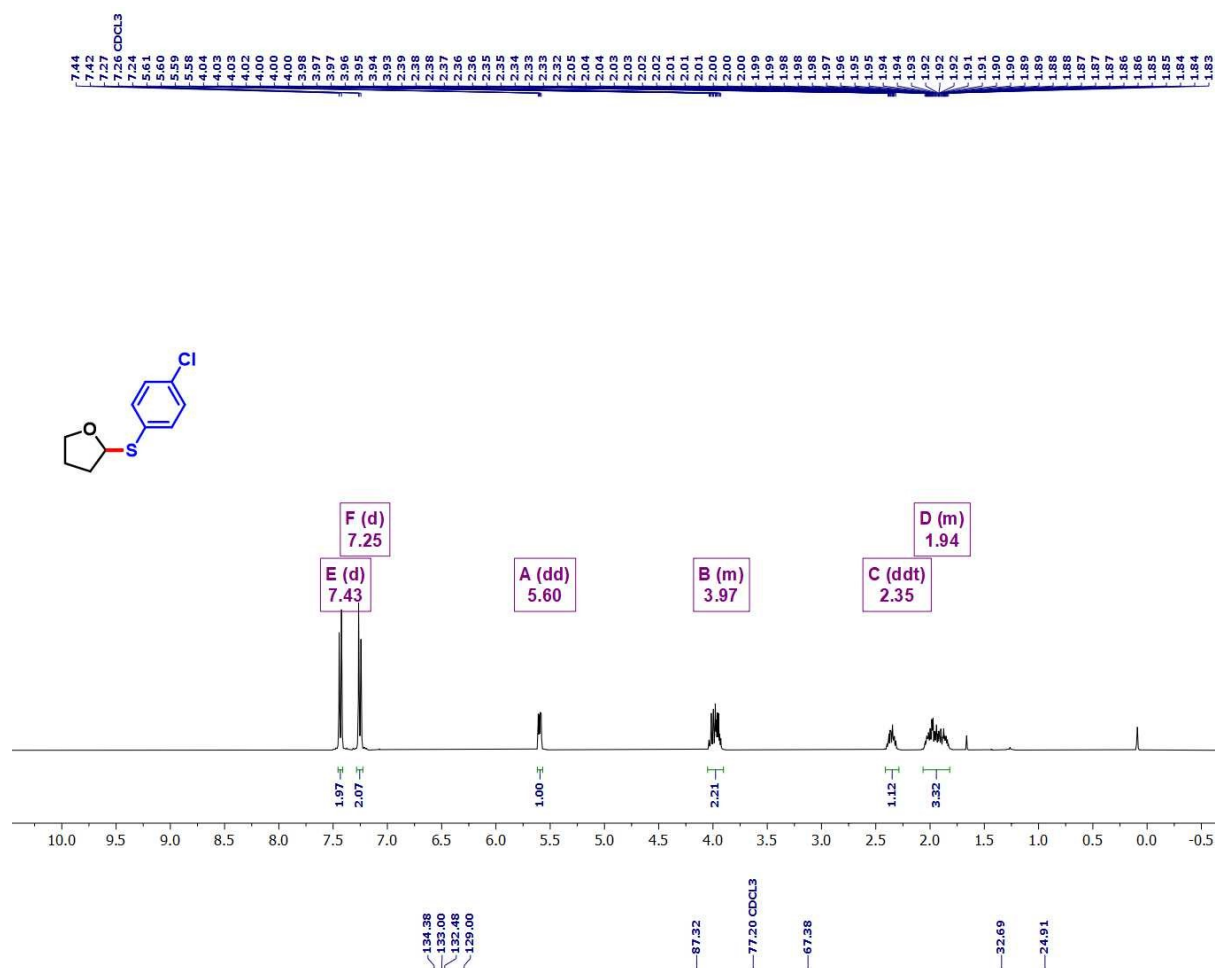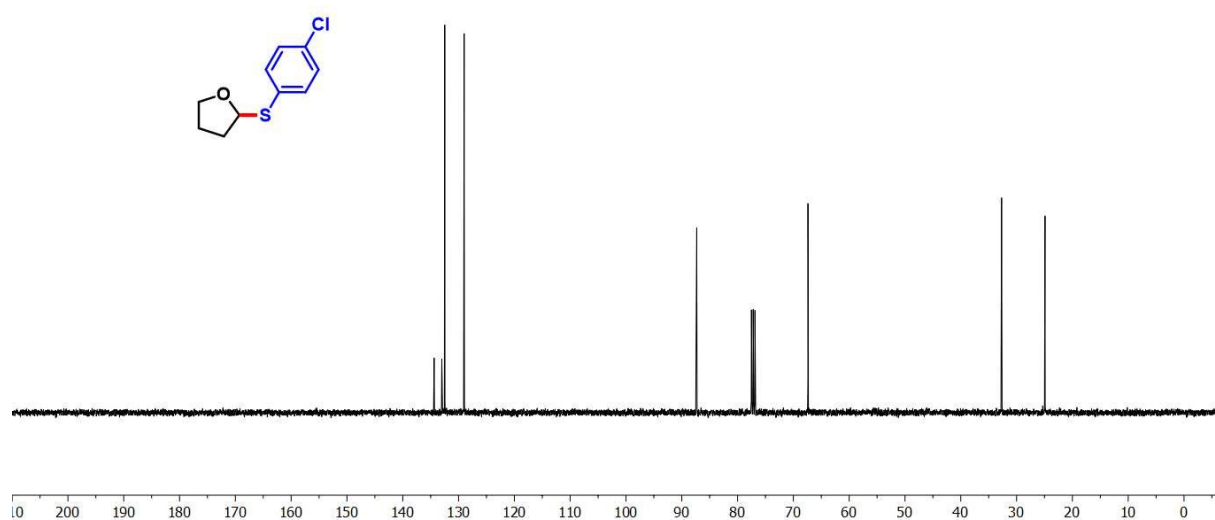

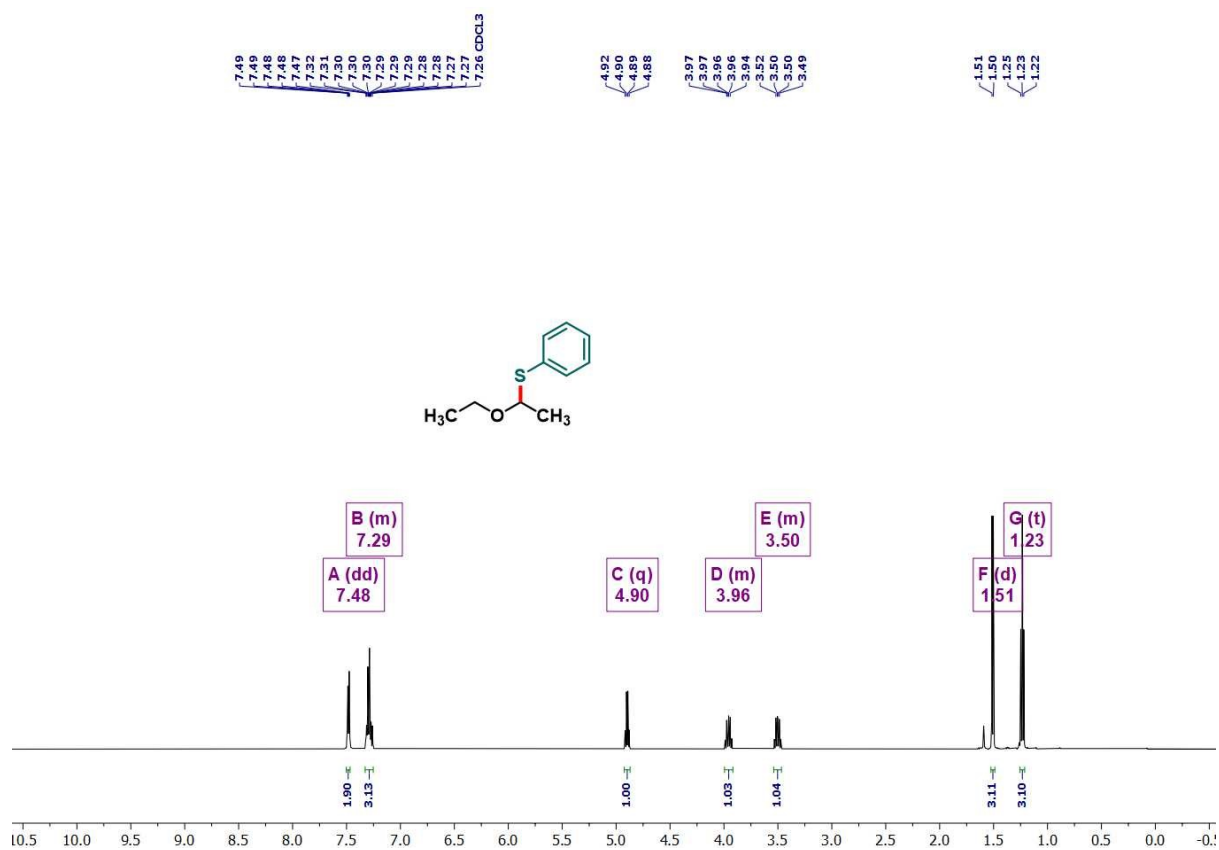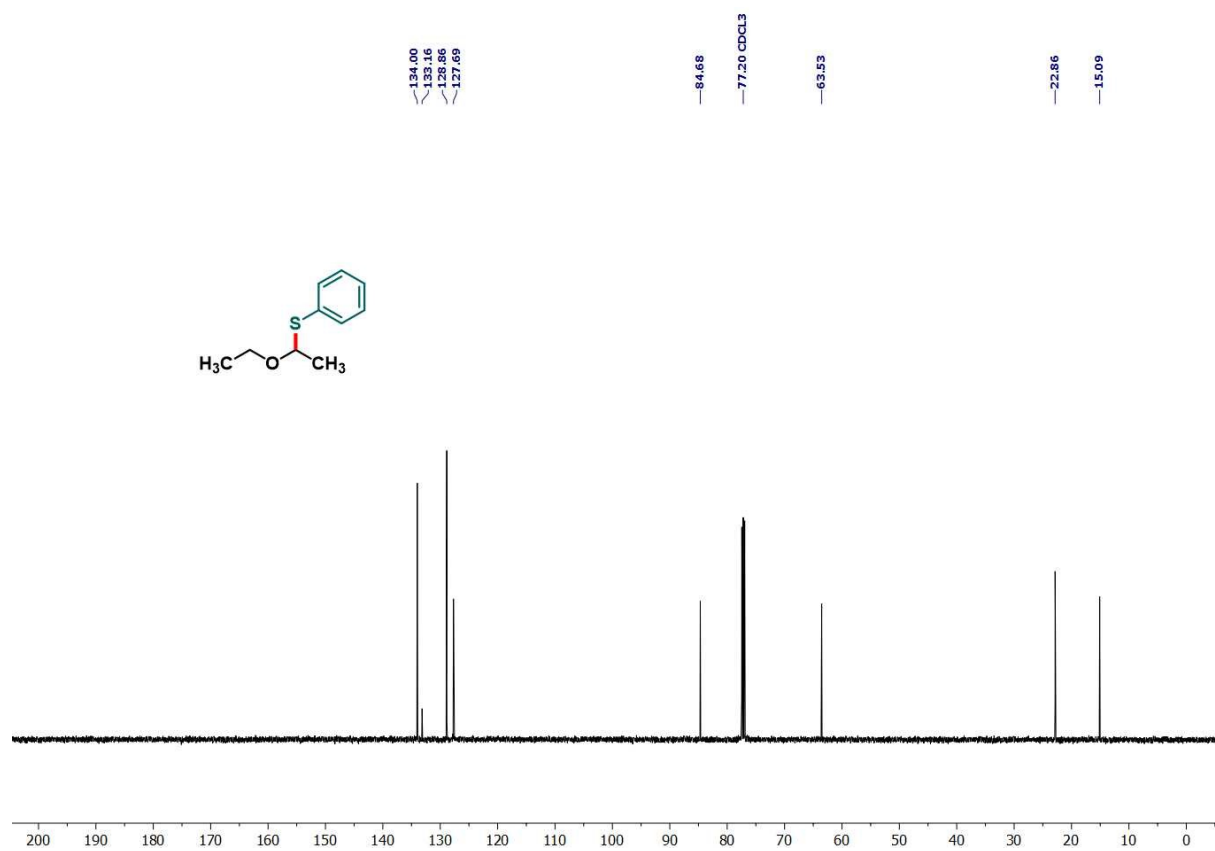

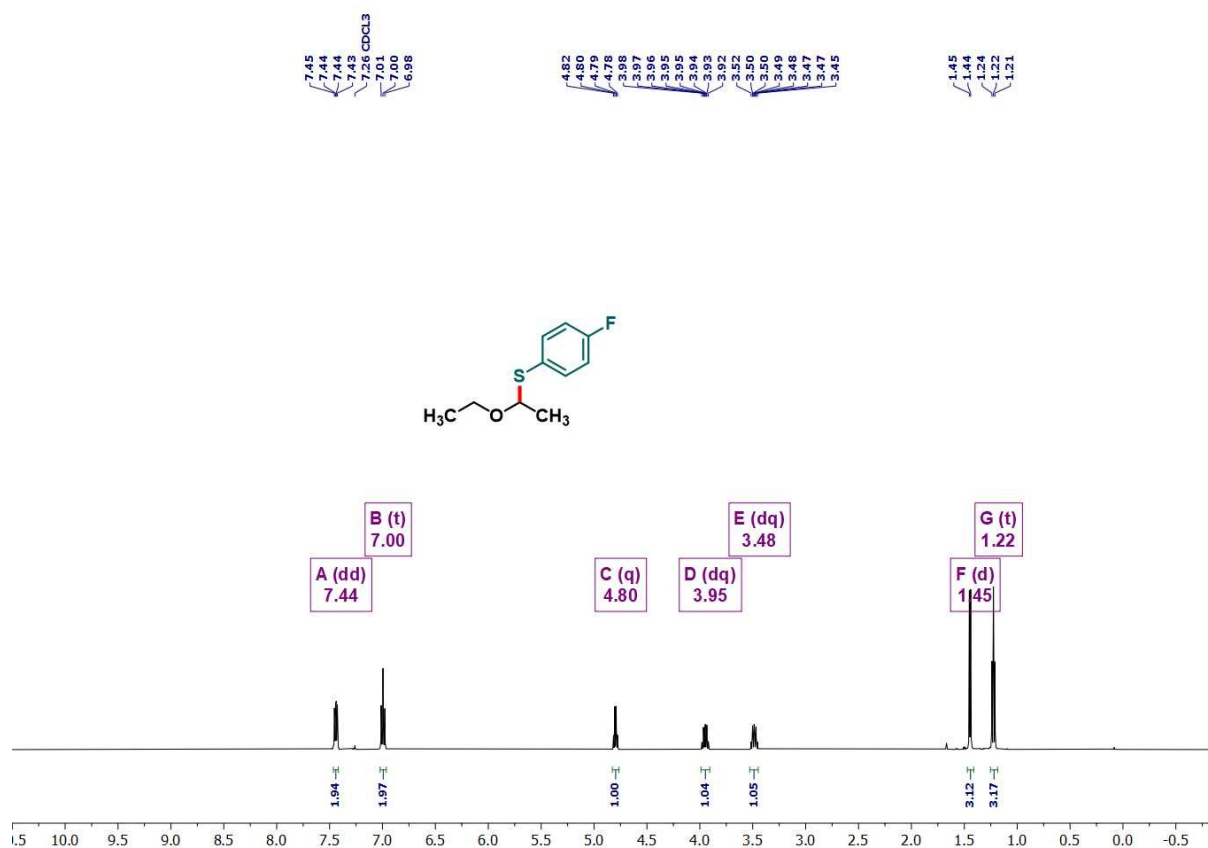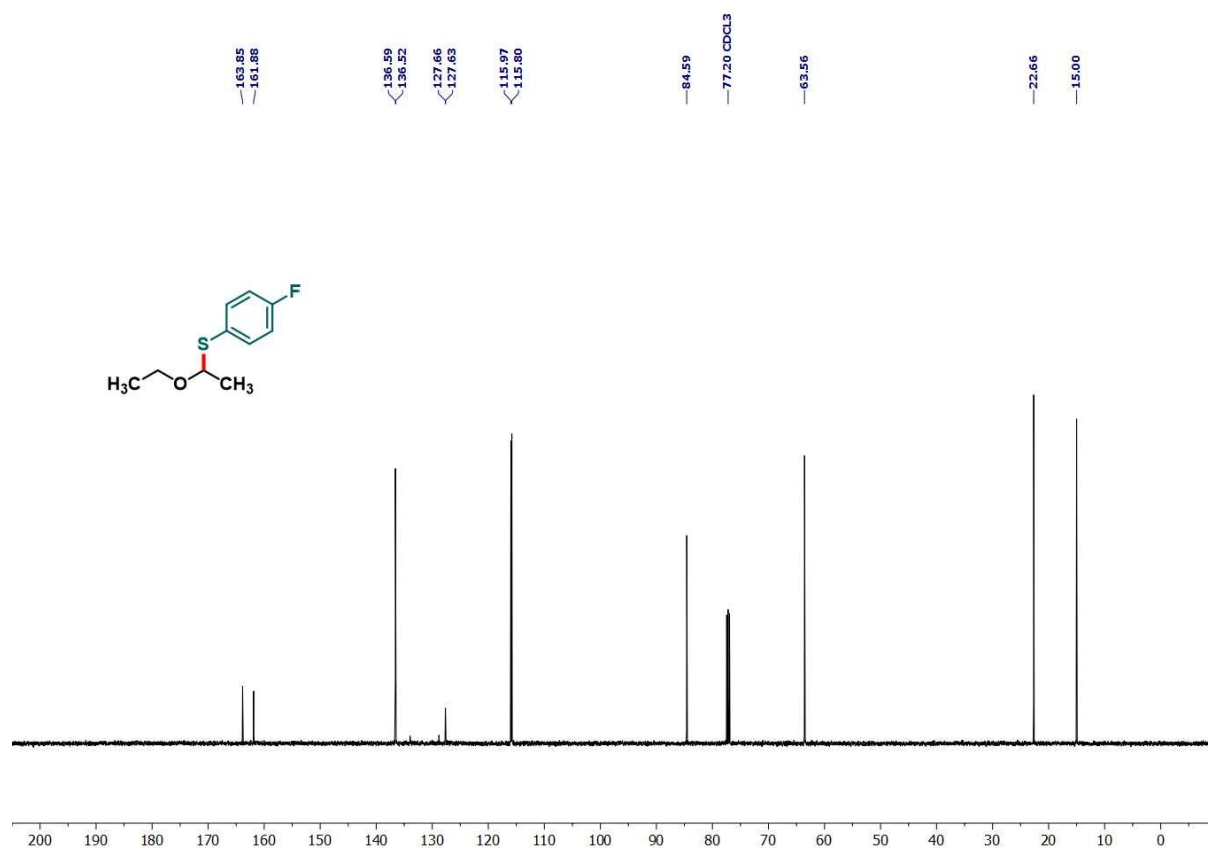

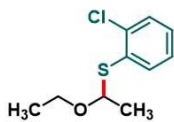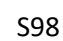

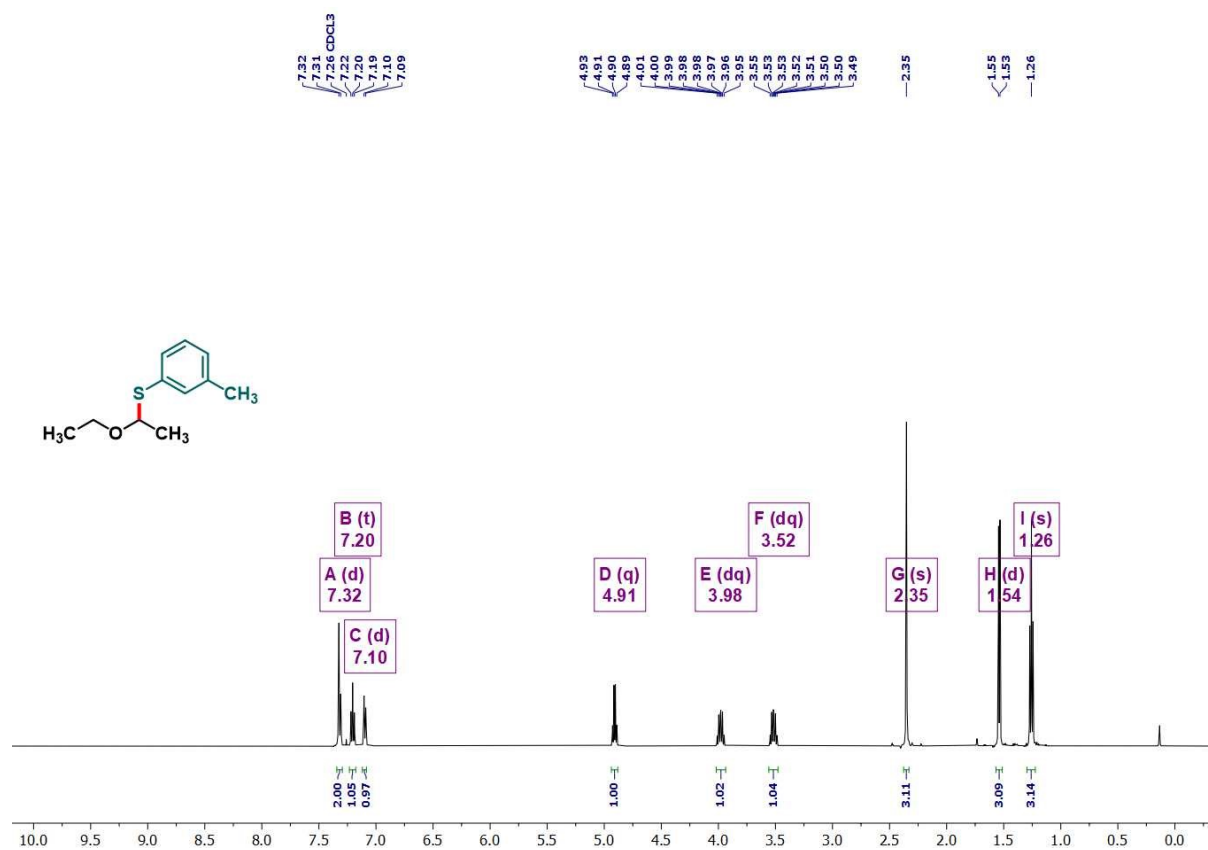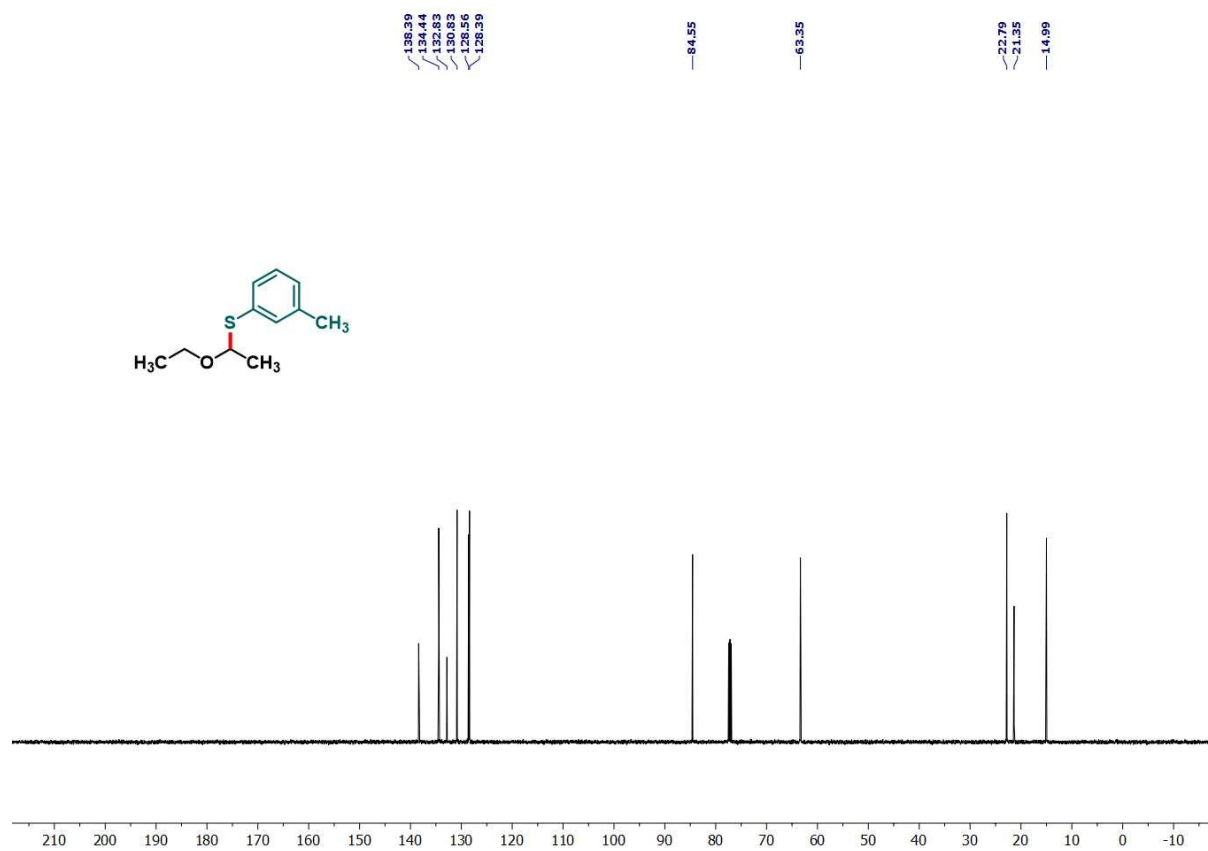

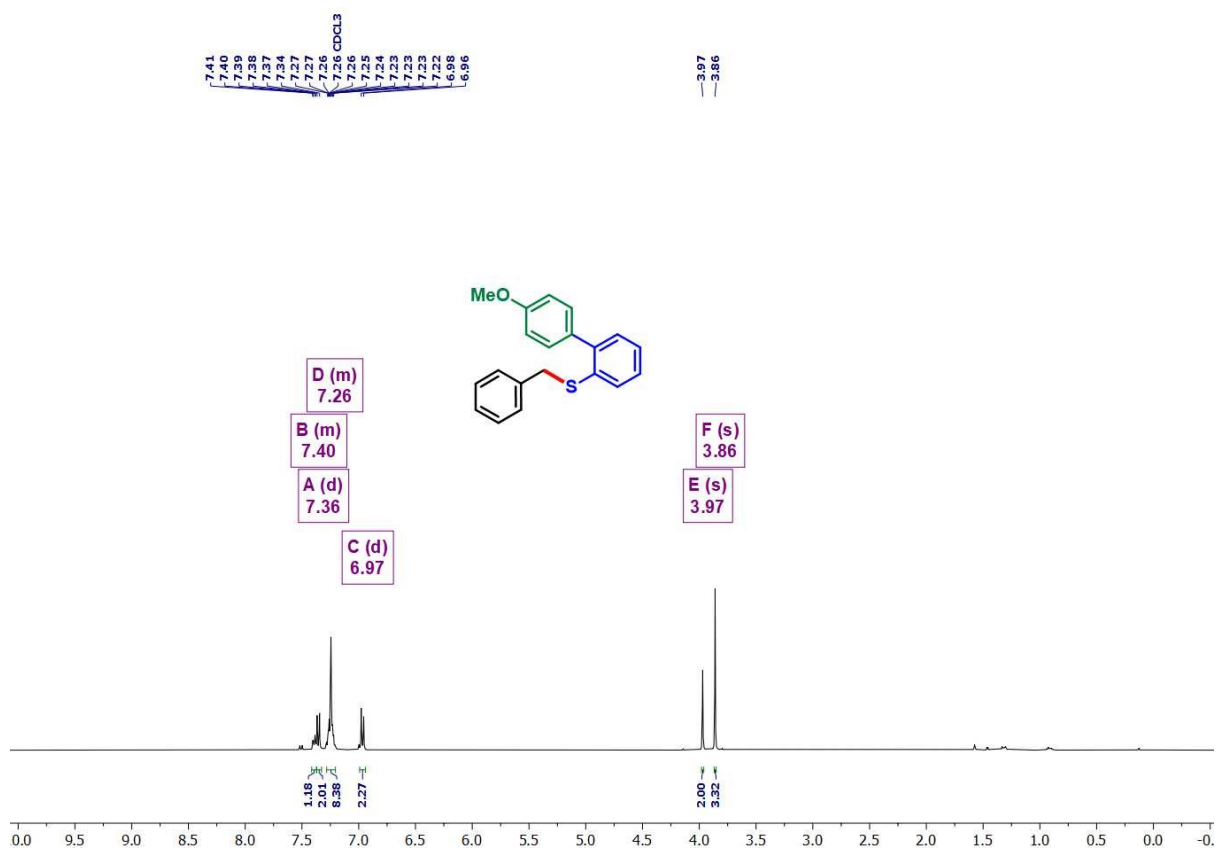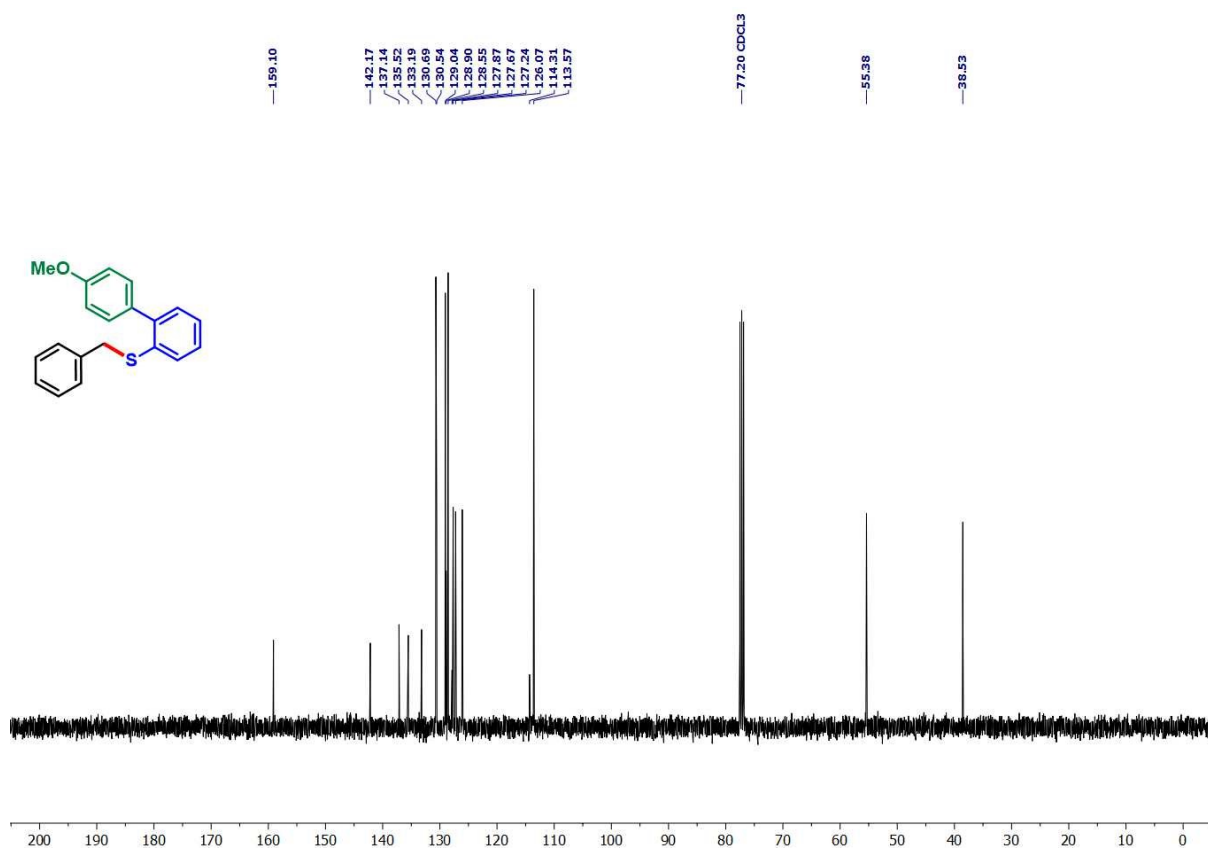



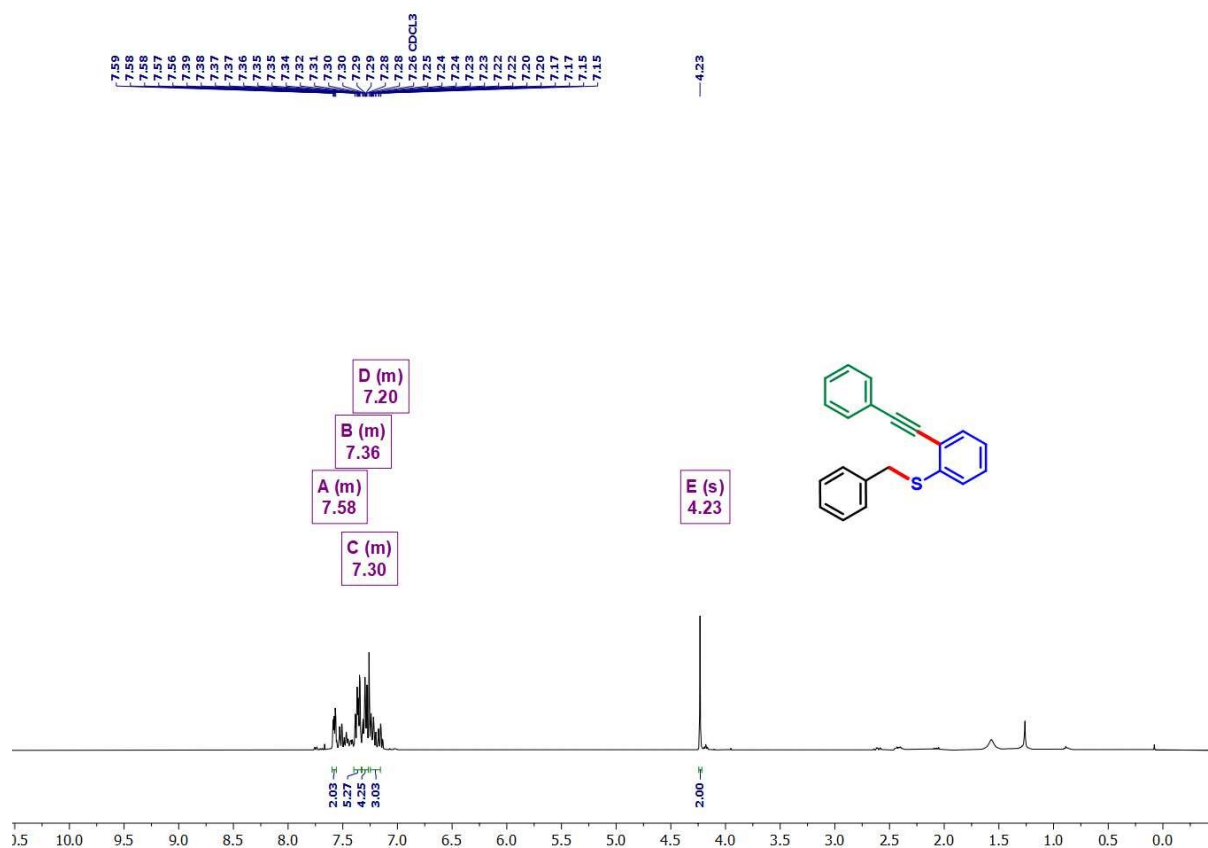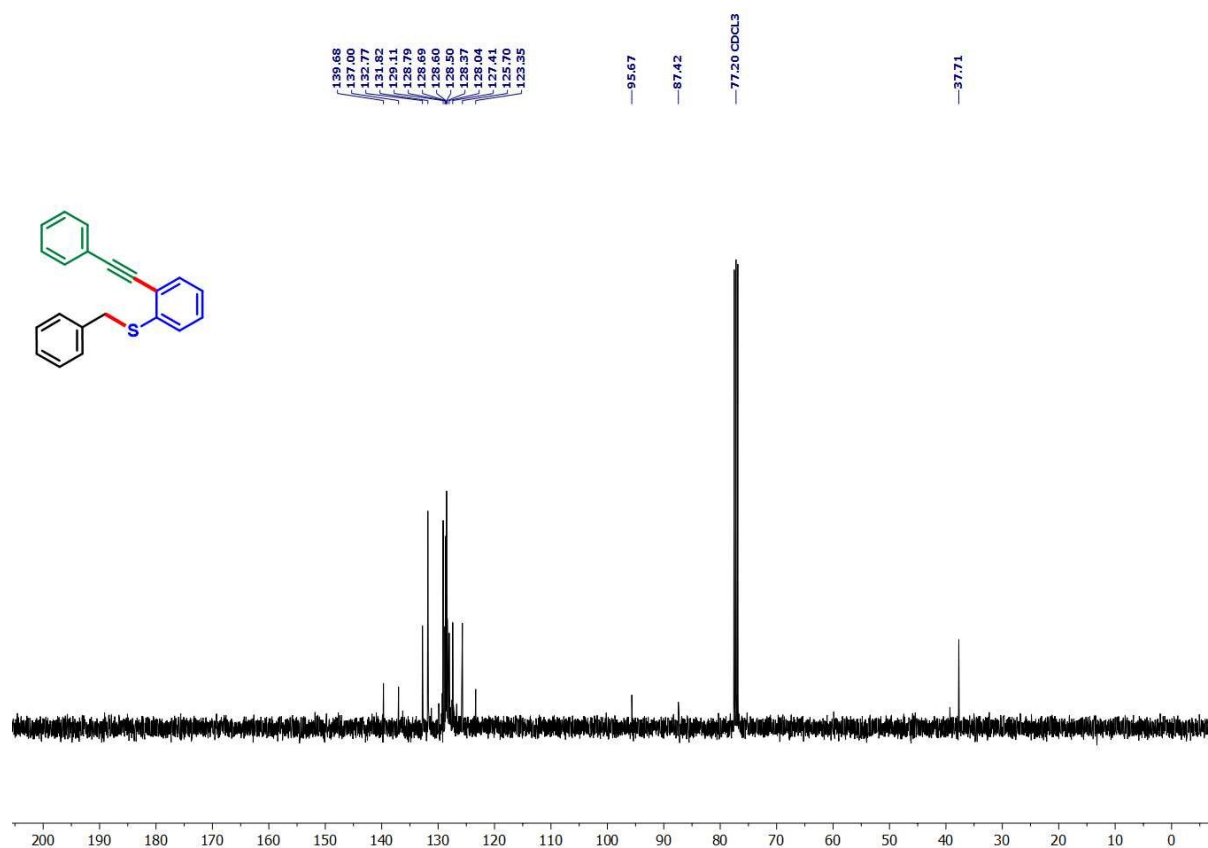

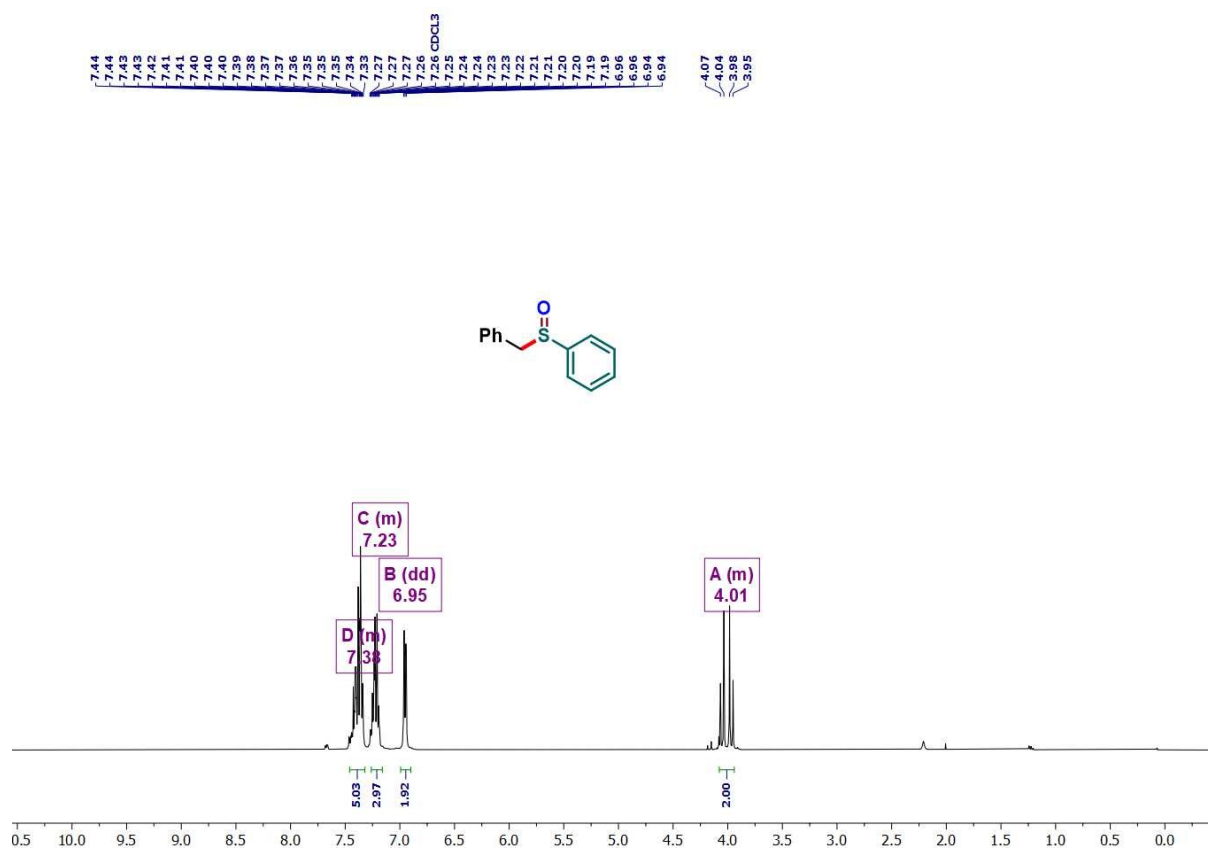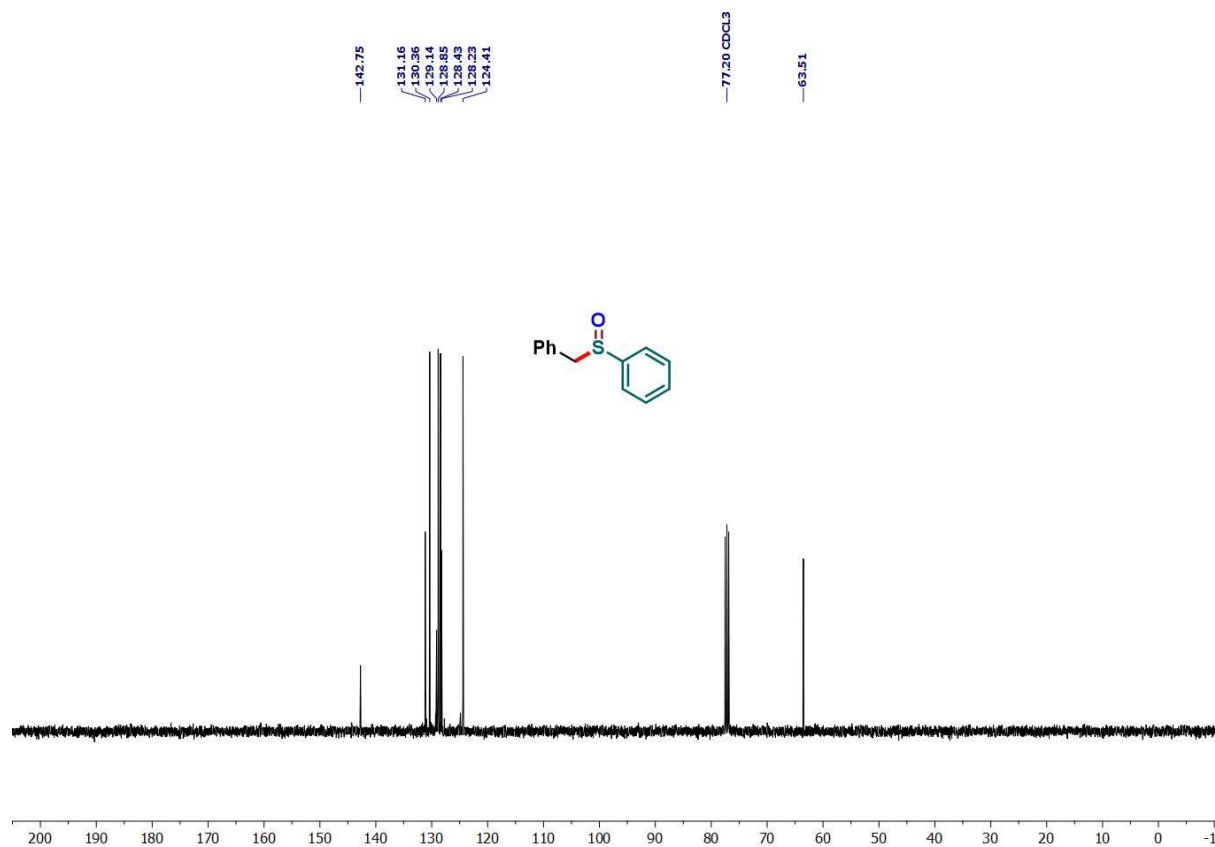

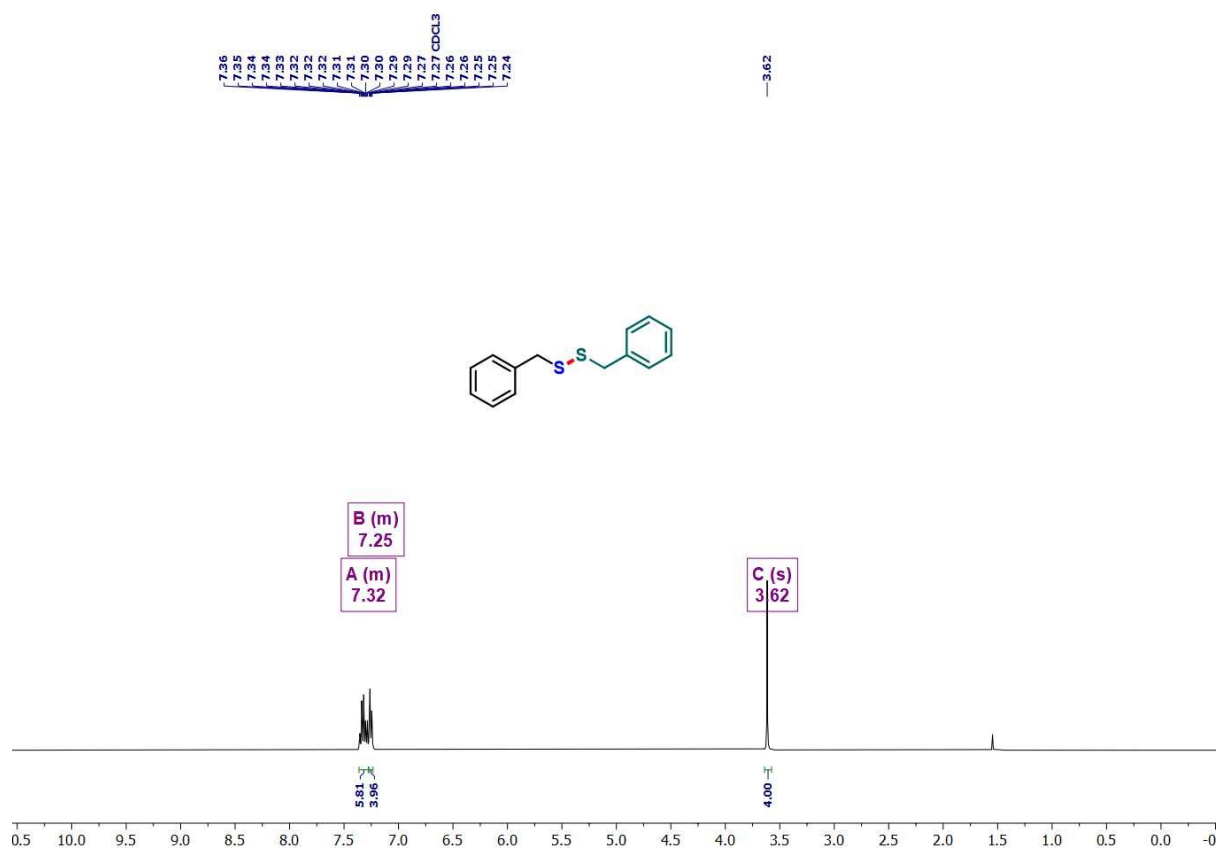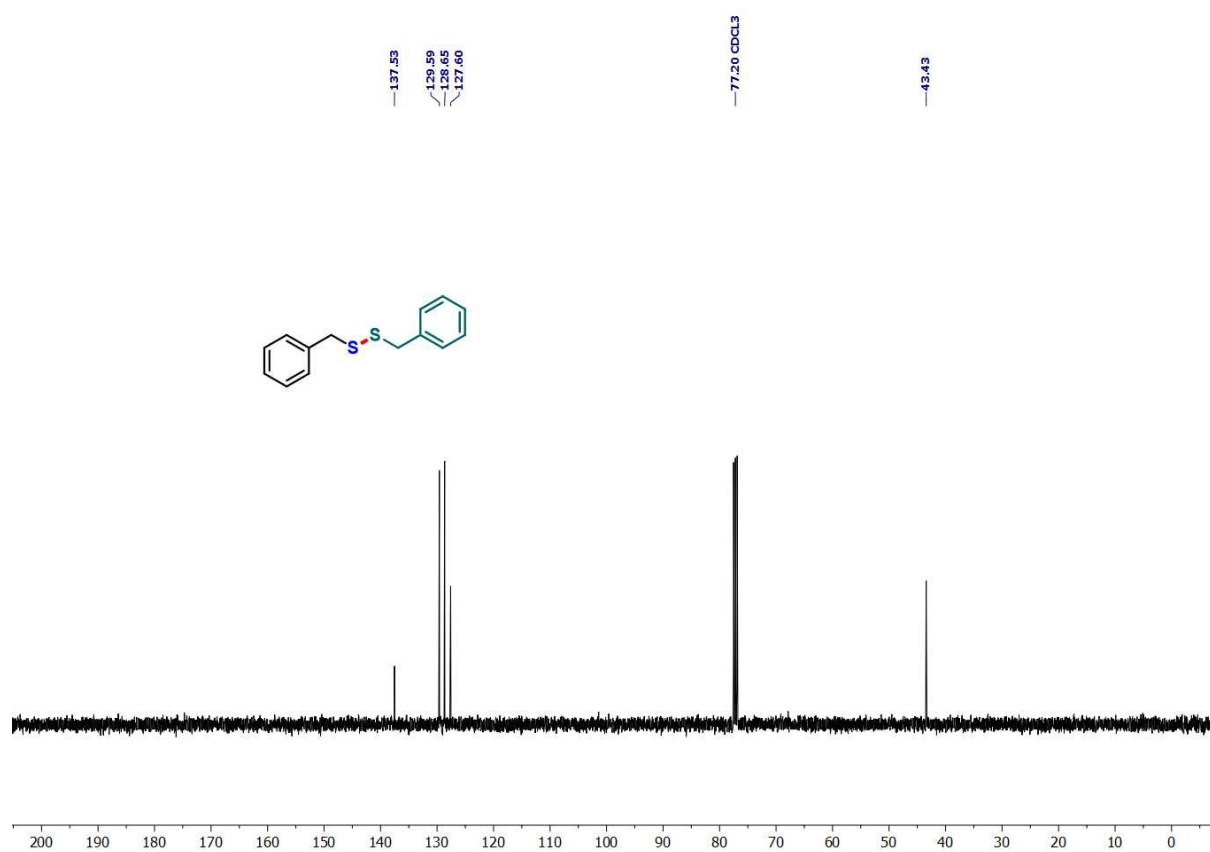

Supplement: d3gc00359k1.pdf [file d3gc00359k1.pdf]
